# Supplementary material for: Decarboxylative cascade cyclization of α-keto acids with 2-cyano-3-arylaniline-derived acrylamides
Source: Royal Society of Chemistry journal article supplement (doi:10.1039/c9ob02023c), 2019-01-01

## Supporting Information

### Decarboxylative cascade cyclization of $\alpha$ -keto acids with 2-cyano-3-arylaniline derived acrylamides

Jia-Qi Shang,<sup>†a</sup> Xiang-Xiang Wang,<sup>†a</sup> Yangchun Xin,<sup>b</sup> Yi Li,<sup>a</sup> Bin Zhou<sup>a</sup> and Ya-Min Li<sup>\*a</sup>

<sup>a</sup>Faculty of Life Science and Technology, Kunming University of Science and Technology, Kunming 650500, P. R. China.

<sup>b</sup>Katzin Diagnostic & Research PET/MR Center, Nemours/Alfred I. DuPont Hospital for Children, Wilmington, DE 19803, United States.

<sup>†</sup>These authors contributed equally.

E-mail: liym@kust.edu.cn.

#### Table of Contents

|                                  |    |
|----------------------------------|----|
| 1. Reaction conditions screening | S1 |
| 2. Mechanistic studies           | S2 |
| 3. Charts of compounds           | S5 |

## 1. Reaction conditions screening

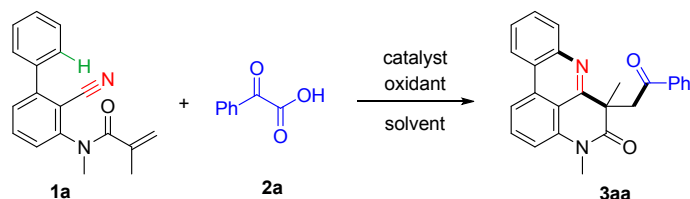

| Entry <sup>a</sup> | 2a (equiv) | Catalyst (mol%)                     | Oxidant (equiv)                                                   | Solvent (mL, v/v)                            | Temp (°C) | Yield <sup>b</sup> (%) |
|--------------------|------------|-------------------------------------|-------------------------------------------------------------------|----------------------------------------------|-----------|------------------------|
| 1                  | 3          | Ag <sub>2</sub> CO <sub>3</sub> (5) | (NH <sub>4</sub> ) <sub>2</sub> S <sub>2</sub> O <sub>8</sub> (1) | Acetone/H <sub>2</sub> O (3, 1/1)            | 120       | 47                     |
| 2                  | 3          | AgF (5)                             | (NH <sub>4</sub> ) <sub>2</sub> S <sub>2</sub> O <sub>8</sub> (1) | Acetone/H <sub>2</sub> O (3, 1/1)            | 120       | 33                     |
| 3                  | 3          | AgOAc (5)                           | (NH <sub>4</sub> ) <sub>2</sub> S <sub>2</sub> O <sub>8</sub> (1) | Acetone/H <sub>2</sub> O (3, 1/1)            | 120       | 28                     |
| 4                  | 3          | AgOTf (5)                           | (NH <sub>4</sub> ) <sub>2</sub> S <sub>2</sub> O <sub>8</sub> (1) | Acetone/H <sub>2</sub> O (3, 1/1)            | 120       | 46                     |
| 5                  | 3          | AgClO <sub>4</sub> (5)              | (NH <sub>4</sub> ) <sub>2</sub> S <sub>2</sub> O <sub>8</sub> (1) | Acetone/H <sub>2</sub> O (3, 1/1)            | 120       | 47                     |
| 6                  | 3          | AgNO <sub>3</sub> (5)               | (NH <sub>4</sub> ) <sub>2</sub> S <sub>2</sub> O <sub>8</sub> (1) | Acetone/H <sub>2</sub> O (3, 1/1)            | 120       | 52                     |
| 7                  | 3          | Ag <sub>2</sub> O (5)               | (NH <sub>4</sub> ) <sub>2</sub> S <sub>2</sub> O <sub>8</sub> (1) | Acetone/H <sub>2</sub> O (3, 1/1)            | 120       | 54                     |
| 8                  | 3          | Ag <sub>2</sub> O (3)               | (NH <sub>4</sub> ) <sub>2</sub> S <sub>2</sub> O <sub>8</sub> (1) | Acetone/H <sub>2</sub> O (3, 1/1)            | 120       | 47                     |
| 9                  | 3          | Ag <sub>2</sub> O (10)              | (NH <sub>4</sub> ) <sub>2</sub> S <sub>2</sub> O <sub>8</sub> (1) | Acetone/H <sub>2</sub> O (3, 1/1)            | 120       | 37                     |
| 10                 | 3          | Ag <sub>2</sub> O (5)               | K <sub>2</sub> S <sub>2</sub> O <sub>8</sub> (1)                  | Acetone/H <sub>2</sub> O (3, 1/1)            | 120       | 43                     |
| 11                 | 3          | Ag <sub>2</sub> O (5)               | Oxone (1)                                                         | Acetone/H <sub>2</sub> O (3, 1/1)            | 120       | Trace                  |
| 12                 | 3          | Ag <sub>2</sub> O (5)               | Ce(SO <sub>4</sub> ) <sub>2</sub> (1)                             | Acetone/H <sub>2</sub> O (3, 1/1)            | 120       | 0                      |
| 13                 | 3          | Ag <sub>2</sub> O (5)               | DTBP (1)                                                          | Acetone/H <sub>2</sub> O (3, 1/1)            | 120       | Trace                  |
| 14                 | 3          | Ag <sub>2</sub> O (5)               | TBPB (1)                                                          | Acetone/H <sub>2</sub> O (3, 1/1)            | 120       | Trace                  |
| 15                 | 3          | Ag <sub>2</sub> O (5)               | BPO (1)                                                           | Acetone/H <sub>2</sub> O (3, 1/1)            | 120       | 11                     |
| 16                 | 3          | Ag <sub>2</sub> O (5)               | DCP (1)                                                           | Acetone/H <sub>2</sub> O (3, 1/1)            | 120       | Trace                  |
| 17                 | 3          | Ag <sub>2</sub> O (5)               | (NH <sub>4</sub> ) <sub>2</sub> S <sub>2</sub> O <sub>8</sub> (2) | Acetone/H <sub>2</sub> O (3, 1/1)            | 120       | 57                     |
| 18                 | 3          | Ag <sub>2</sub> O (5)               | (NH <sub>4</sub> ) <sub>2</sub> S <sub>2</sub> O <sub>8</sub> (3) | Acetone/H <sub>2</sub> O (3, 1/1)            | 120       | 61                     |
| 19                 | 3          | Ag <sub>2</sub> O (5)               | (NH <sub>4</sub> ) <sub>2</sub> S <sub>2</sub> O <sub>8</sub> (4) | Acetone/H <sub>2</sub> O (3, 1/1)            | 120       | 60                     |
| 20                 | 2          | Ag <sub>2</sub> O (5)               | (NH <sub>4</sub> ) <sub>2</sub> S <sub>2</sub> O <sub>8</sub> (3) | Acetone/H <sub>2</sub> O (3, 1/1)            | 120       | 28                     |
| 21                 | 4          | Ag <sub>2</sub> O (5)               | (NH <sub>4</sub> ) <sub>2</sub> S <sub>2</sub> O <sub>8</sub> (3) | Acetone/H <sub>2</sub> O (3, 1/1)            | 120       | 43                     |
| 22                 | 3          | Ag <sub>2</sub> O (5)               | (NH <sub>4</sub> ) <sub>2</sub> S <sub>2</sub> O <sub>8</sub> (3) | THF/H <sub>2</sub> O (3, 1/1)                | 120       | 27                     |
| 23                 | 3          | Ag <sub>2</sub> O (5)               | (NH <sub>4</sub> ) <sub>2</sub> S <sub>2</sub> O <sub>8</sub> (3) | <i>i</i> -PrOH/H <sub>2</sub> O (3, 1/1)     | 120       | 45                     |
| 24                 | 3          | Ag <sub>2</sub> O (5)               | (NH <sub>4</sub> ) <sub>2</sub> S <sub>2</sub> O <sub>8</sub> (3) | CH <sub>3</sub> CN/H <sub>2</sub> O (3, 1/1) | 120       | 35                     |
| 25                 | 3          | Ag <sub>2</sub> O (5)               | (NH <sub>4</sub> ) <sub>2</sub> S <sub>2</sub> O <sub>8</sub> (3) | Dioxane/H <sub>2</sub> O (3, 1/1)            | 120       | 33                     |
| 26                 | 3          | Ag <sub>2</sub> O (5)               | (NH <sub>4</sub> ) <sub>2</sub> S <sub>2</sub> O <sub>8</sub> (3) | DMF/H <sub>2</sub> O (3, 1/1)                | 120       | 29                     |
| 27                 | 3          | Ag <sub>2</sub> O (5)               | (NH <sub>4</sub> ) <sub>2</sub> S <sub>2</sub> O <sub>8</sub> (3) | DMSO/H <sub>2</sub> O (3, 1/1)               | 120       | Trace                  |
| 28                 | 3          | Ag <sub>2</sub> O (5)               | (NH <sub>4</sub> ) <sub>2</sub> S <sub>2</sub> O <sub>8</sub> (3) | DCE/H <sub>2</sub> O (3, 1/1)                | 120       | Trace                  |
| 29                 | 3          | Ag <sub>2</sub> O (5)               | (NH <sub>4</sub> ) <sub>2</sub> S <sub>2</sub> O <sub>8</sub> (3) | Toluene/H <sub>2</sub> O (3, 1/1)            | 120       | Trace                  |
| 30                 | 3          | Ag <sub>2</sub> O (5)               | (NH <sub>4</sub> ) <sub>2</sub> S <sub>2</sub> O <sub>8</sub> (3) | Acetone/H <sub>2</sub> O (1.5, 1/1)          | 120       | 42                     |
| 31                 | 3          | Ag <sub>2</sub> O (5)               | (NH <sub>4</sub> ) <sub>2</sub> S <sub>2</sub> O <sub>8</sub> (3) | Acetone/H <sub>2</sub> O (4.5, 1/1)          | 120       | 38                     |
| 32                 | 3          | Ag <sub>2</sub> O (5)               | (NH <sub>4</sub> ) <sub>2</sub> S <sub>2</sub> O <sub>8</sub> (3) | Acetone/H <sub>2</sub> O (3, 1/1)            | 90        | 54                     |
| 33                 | 3          | Ag <sub>2</sub> O (5)               | (NH <sub>4</sub> ) <sub>2</sub> S <sub>2</sub> O <sub>8</sub> (3) | Acetone/H <sub>2</sub> O (3, 1/1)            | 100       | 61                     |
| 34                 | 3          | Ag <sub>2</sub> O (5)               | (NH <sub>4</sub> ) <sub>2</sub> S <sub>2</sub> O <sub>8</sub> (3) | Acetone/H <sub>2</sub> O (3, 1/1)            | 110       | 59                     |
| 35                 | 3          | Ag <sub>2</sub> O (5)               | (NH <sub>4</sub> ) <sub>2</sub> S <sub>2</sub> O <sub>8</sub> (3) | Acetone/H <sub>2</sub> O (3, 1/1)            | 130       | 47                     |
| 36                 | 3          | Ag <sub>2</sub> O (5)               | (NH <sub>4</sub> ) <sub>2</sub> S <sub>2</sub> O <sub>8</sub> (3) | Acetone/H <sub>2</sub> O (3, 2/1)            | 100       | 37                     |
| 37                 | 3          | Ag <sub>2</sub> O (5)               | (NH <sub>4</sub> ) <sub>2</sub> S <sub>2</sub> O <sub>8</sub> (3) | Acetone/H <sub>2</sub> O (3, 1/2)            | 100       | Trace                  |

|    |   |                       |                                                                   |                                     |     |    |
|----|---|-----------------------|-------------------------------------------------------------------|-------------------------------------|-----|----|
| 38 | 3 | Ag <sub>2</sub> O (5) | (NH <sub>4</sub> ) <sub>2</sub> S <sub>2</sub> O <sub>8</sub> (3) | Acetone/H <sub>2</sub> O (3, 1.5/1) | 100 | 48 |
| 39 | 3 | Ag <sub>2</sub> O (5) | (NH <sub>4</sub> ) <sub>2</sub> S <sub>2</sub> O <sub>8</sub> (3) | Acetone/H <sub>2</sub> O (3, 1/1.1) | 100 | 61 |
| 40 | 3 | Ag <sub>2</sub> O (5) | (NH <sub>4</sub> ) <sub>2</sub> S <sub>2</sub> O <sub>8</sub> (3) | Acetone/H <sub>2</sub> O (3, 1/1.2) | 100 | 58 |
| 41 | 3 | Ag <sub>2</sub> O (5) | (NH <sub>4</sub> ) <sub>2</sub> S <sub>2</sub> O <sub>8</sub> (3) | Acetone/H <sub>2</sub> O (3, 1/1.3) | 100 | 66 |
| 42 | 3 | Ag <sub>2</sub> O (5) | (NH <sub>4</sub> ) <sub>2</sub> S <sub>2</sub> O <sub>8</sub> (3) | Acetone/H <sub>2</sub> O (3, 1/1.4) | 100 | 58 |
| 43 | 3 | Ag <sub>2</sub> O (5) | (NH <sub>4</sub> ) <sub>2</sub> S <sub>2</sub> O <sub>8</sub> (3) | Acetone/H <sub>2</sub> O (3, 1/1.5) | 100 | 59 |
| 44 | 3 | -                     | (NH <sub>4</sub> ) <sub>2</sub> S <sub>2</sub> O <sub>8</sub> (3) | Acetone/H <sub>2</sub> O (3, 1/1.3) | 100 | 39 |
| 45 | 3 | Ag <sub>2</sub> O (5) | -                                                                 | Acetone/H <sub>2</sub> O (3, 1/1.3) | 100 | 0  |
| 46 | 3 | AgNO <sub>3</sub> (5) | (NH <sub>4</sub> ) <sub>2</sub> S <sub>2</sub> O <sub>8</sub> (3) | Acetone/H <sub>2</sub> O (3, 1/1.3) | 100 | 46 |

<sup>a</sup>Reaction conditions: **1a** (0.30 mmol), **2a**, catalyst and oxidant in solvent for 12 h under air. <sup>b</sup>Isolated yield of **3aa**.

## 2. Mechanistic studies

### 1) Radical-trapping experiment

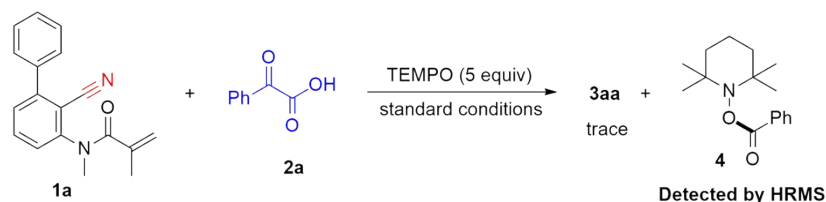

Acrylamide **1a** (0.3 mmol), phenylglyoxylic acid **2a** (0.9 mmol), Ag<sub>2</sub>O (0.015 mmol), (NH<sub>4</sub>)<sub>2</sub>S<sub>2</sub>O<sub>8</sub> (0.9 mmol), TEMPO (1.5 mmol) and acetone/H<sub>2</sub>O [3.0 mL, 1/1.3 (v/v)] were added in a sealed tube with a Teflon lined cap. The mixture was allowed to stir at 100 °C for 12 hours. After cooling down to room temperature, the mixture was under HRMS (ESI) analysis.

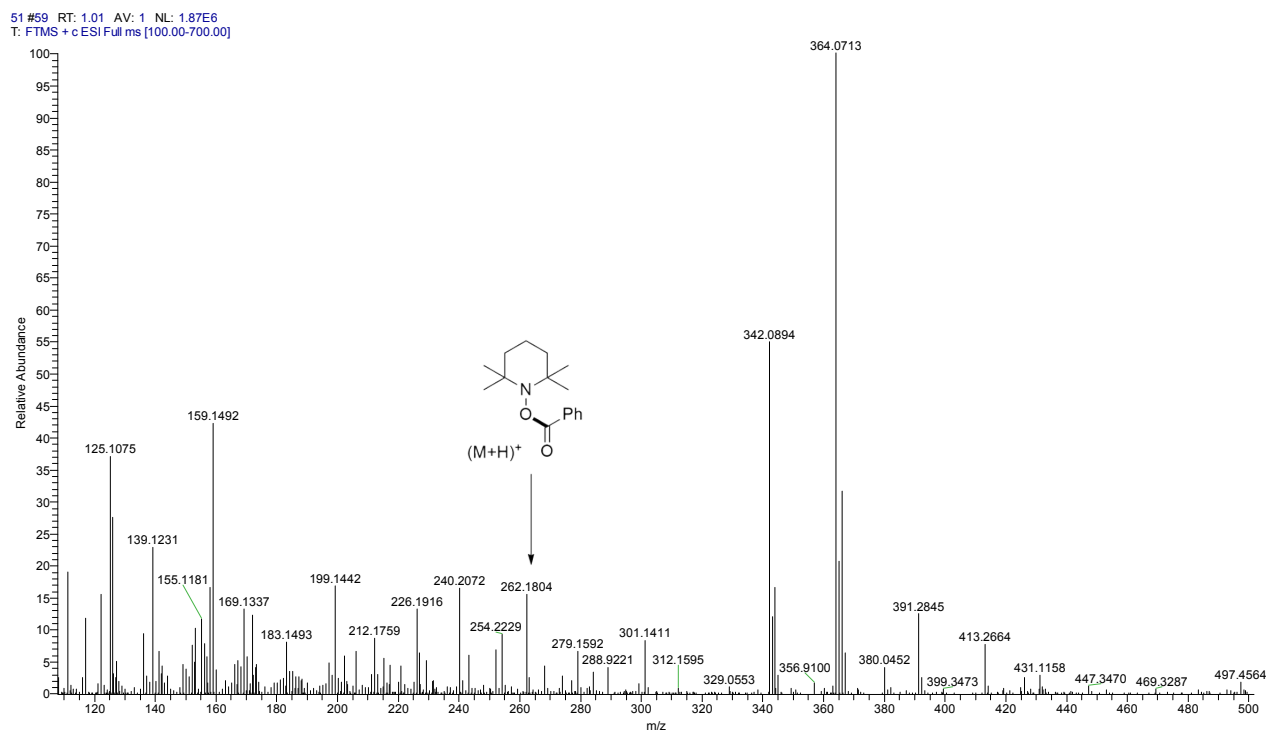

**Figure S1.** HRMS spectra of the reaction solution.

## 2) Kinetic isotope effect (KIE) experiments

### a) Intermolecular KIE experiment

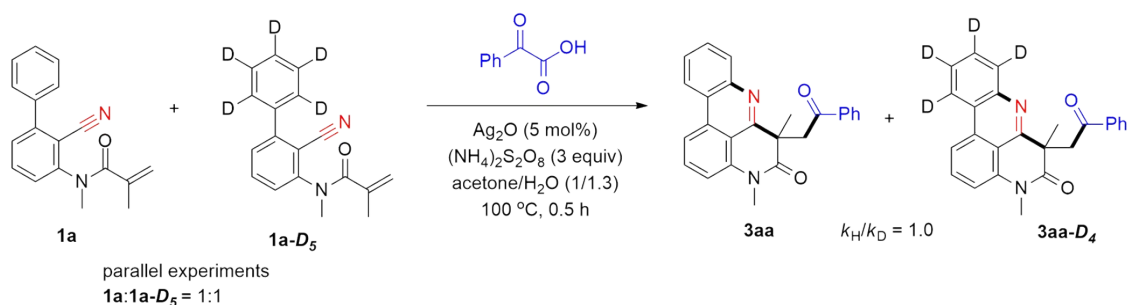

Acrylamide **1a** (0.3 mmol), phenylglyoxylic acid **2a** (0.9 mmol),  $\text{Ag}_2\text{O}$  (0.015 mmol),  $(\text{NH}_4)_2\text{S}_2\text{O}_8$  (0.9 mmol) and acetone/ $\text{H}_2\text{O}$  [3.0 mL, 1/1.3 (v/v)] were added in a sealed tube with a Teflon lined cap. In another reaction vessel, acrylamide **1a-D<sub>5</sub>** was used instead of **1a**. The two reactions were stirred at 100 °C for 0.5 hour. After cooling down to room temperature, the two reaction mixtures were combined, and the aqueous  $\text{Na}_2\text{CO}_3$  (1.0 M, 10.0 mL) was added, then extracted with ethyl acetate. The organic phase was dried over anhydrous  $\text{Na}_2\text{SO}_4$ , and filtered. The filtrate was concentrated by rotary evaporation and purified by flash chromatography on silica gel with petroleum ether/ethyl acetate (6/1) as the eluent to afford the corresponding product **3aa** and **3aa-D<sub>4</sub>** (38 mg, 17%). The products were under  $^1\text{H}$  NMR analysis (Figure S2).

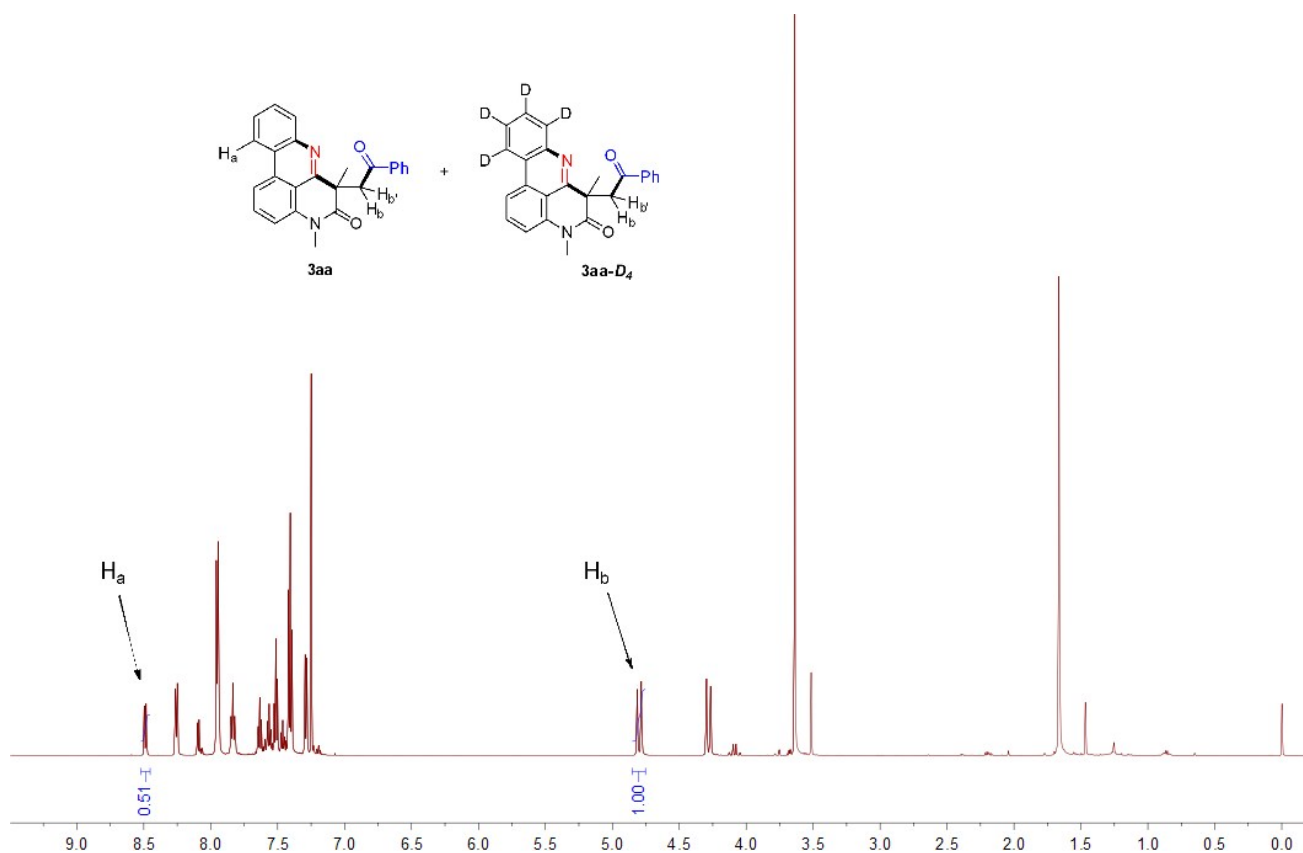

Figure S2.  $^1\text{H}$  NMR spectra of the mixture of compound **3aa** and **3aa-D<sub>4</sub>**.

## b) Intramolecular KIE experiment

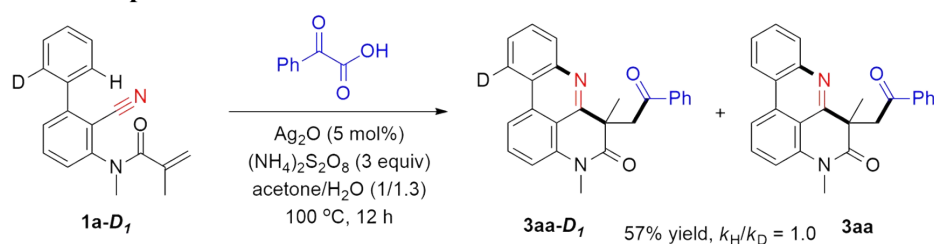

Acrylamide **1a-D<sub>1</sub>** (0.3 mmol), phenylglyoxylic acid **2a** (0.9 mmol),  $\text{Ag}_2\text{O}$  (0.015 mmol),  $(\text{NH}_4)_2\text{S}_2\text{O}_8$  (0.9 mmol) and acetone/ $\text{H}_2\text{O}$  [3.0 mL, 1/1.3 (v/v)] were added in a sealed tube with a Teflon lined cap. The reaction was stirred at 100 °C for 12 hours. After cooling down to room temperature, the aqueous  $\text{Na}_2\text{CO}_3$  (1.0 M, 5.0 mL) was added, then extracted with ethyl acetate. The organic phase was dried over anhydrous  $\text{Na}_2\text{SO}_4$ , and filtered. The filtrate was concentrated by rotary evaporation and purified by flash chromatography on silica gel with petroleum ether/ethyl acetate (6/1) as the eluent to afford the corresponding product **3aa** and **3aa-D<sub>1</sub>** (65 mg, 57%). The products were under  $^1\text{H}$  NMR analysis (Figure S3).

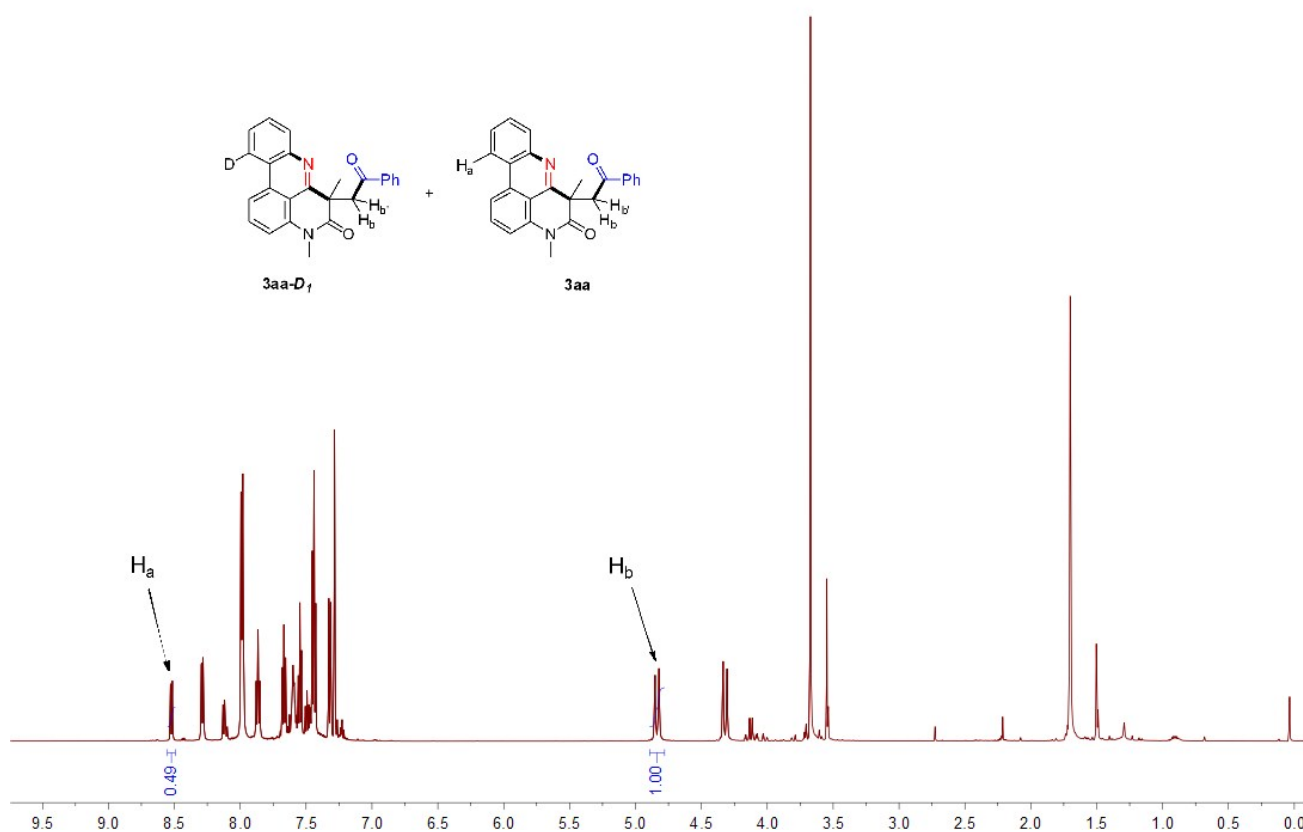

Figure S3.  $^1\text{H}$  NMR spectra of the mixture of compound **3aa** and **3aa-D<sub>1</sub>**.

### 3. Charts of compounds

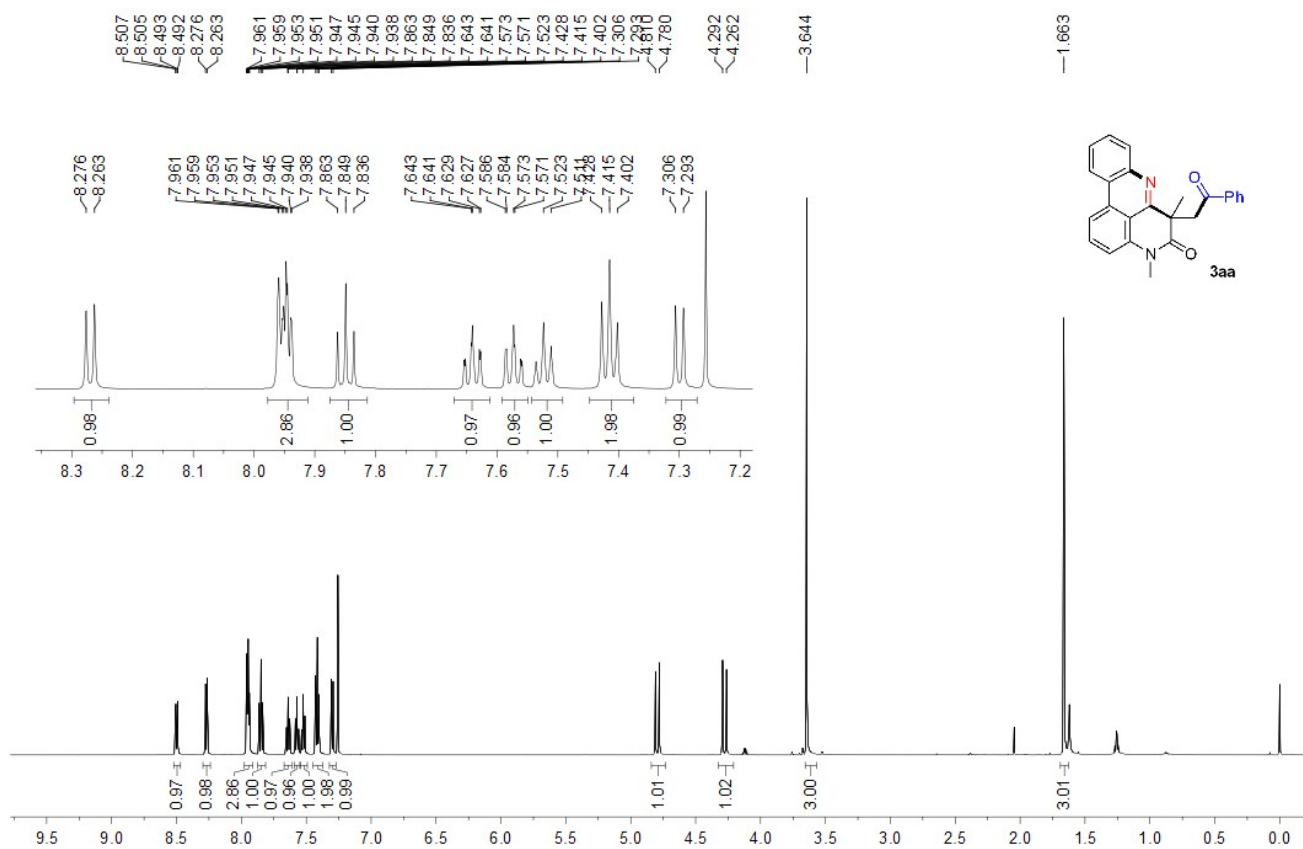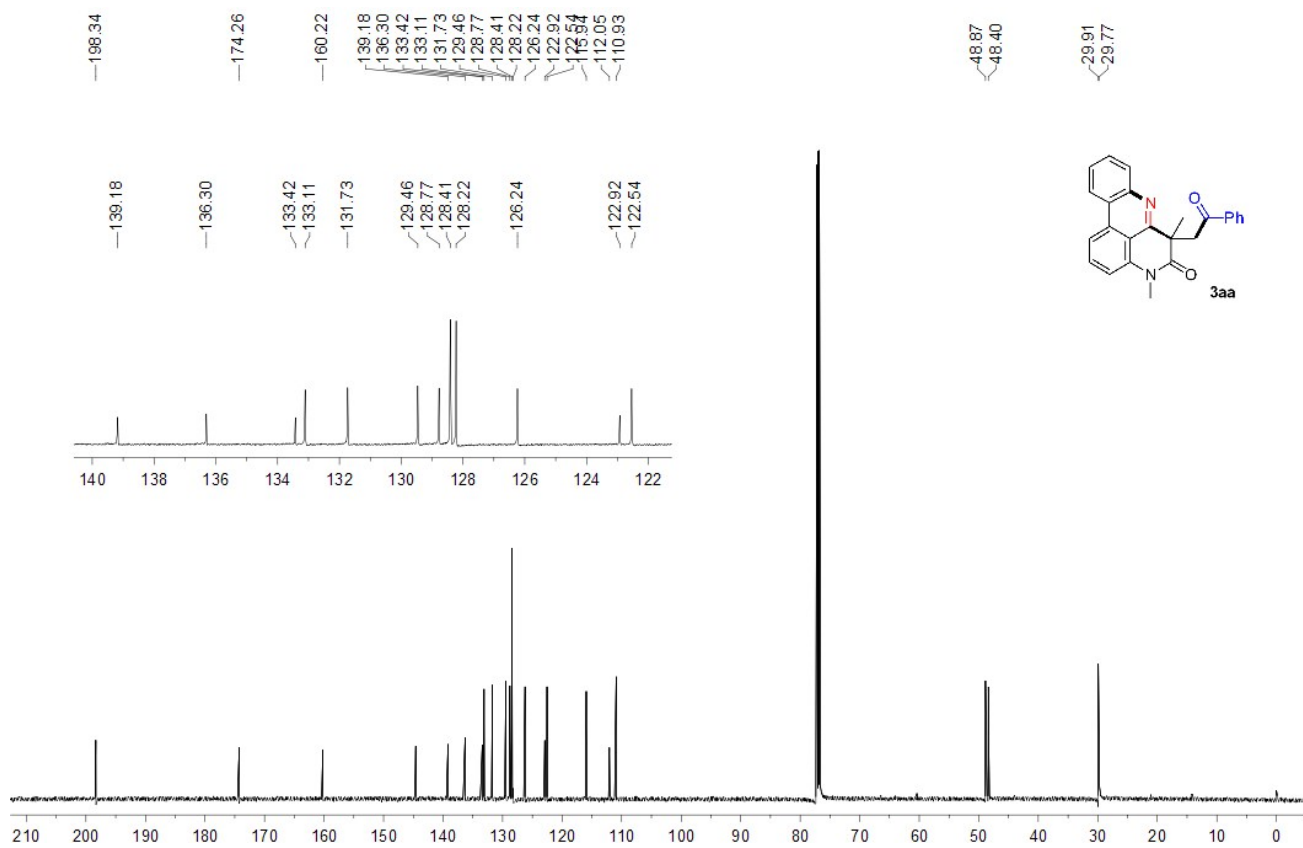

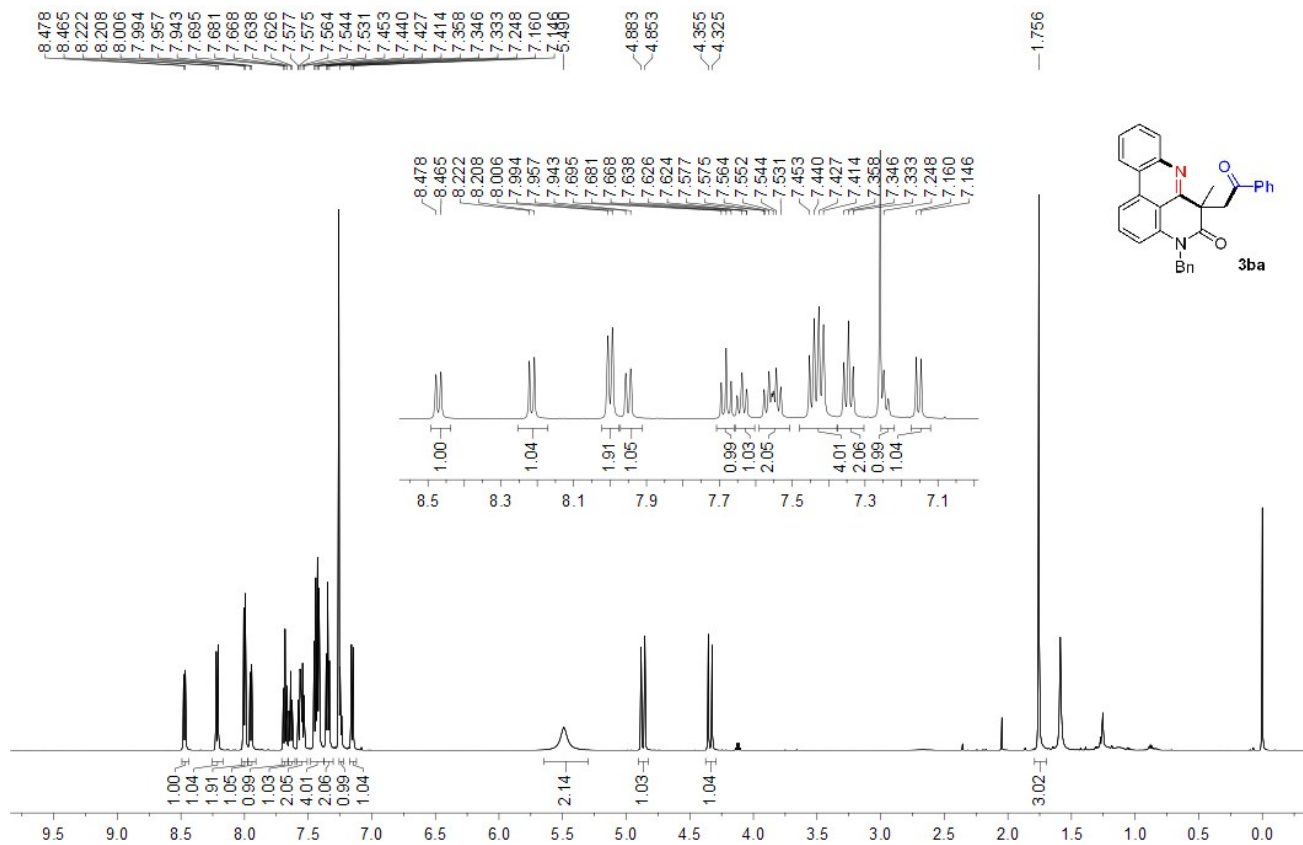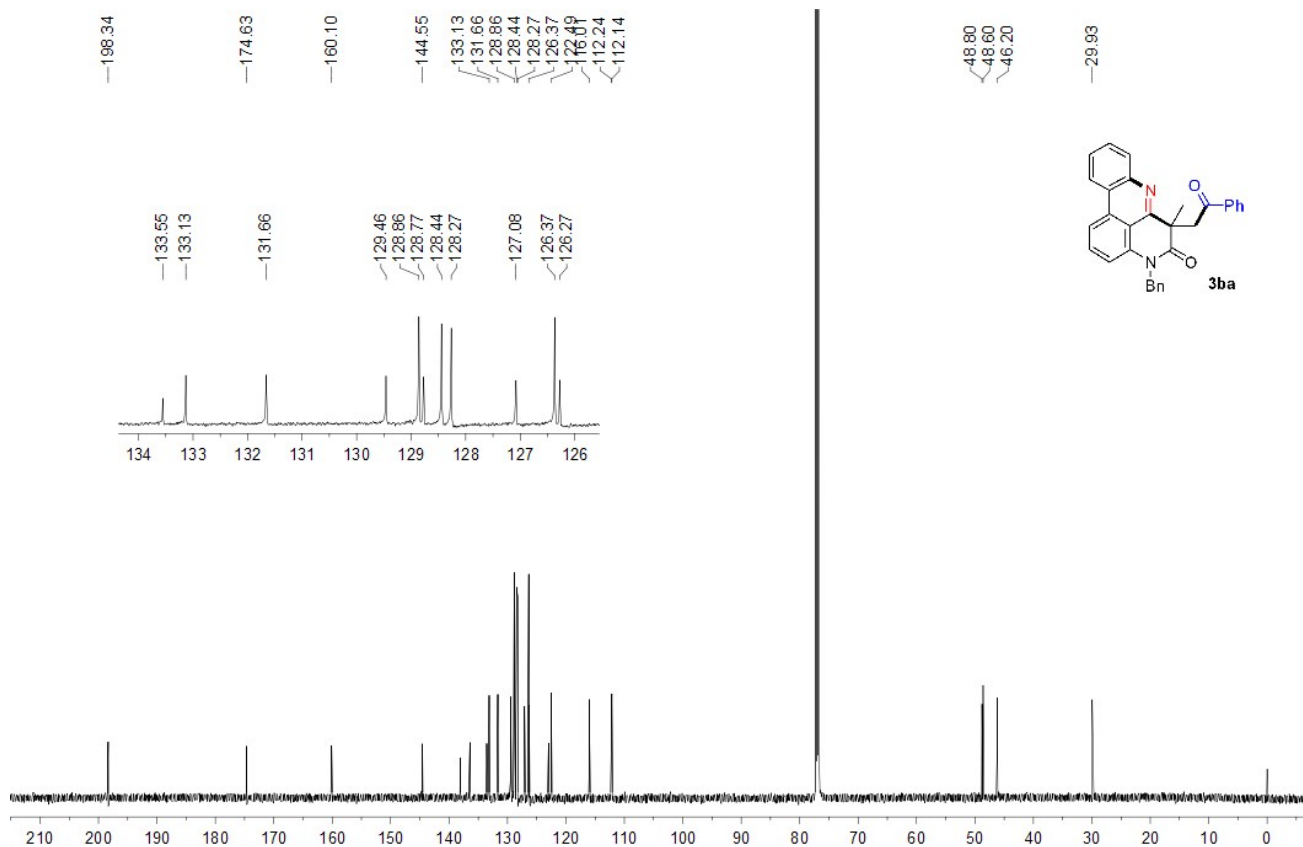

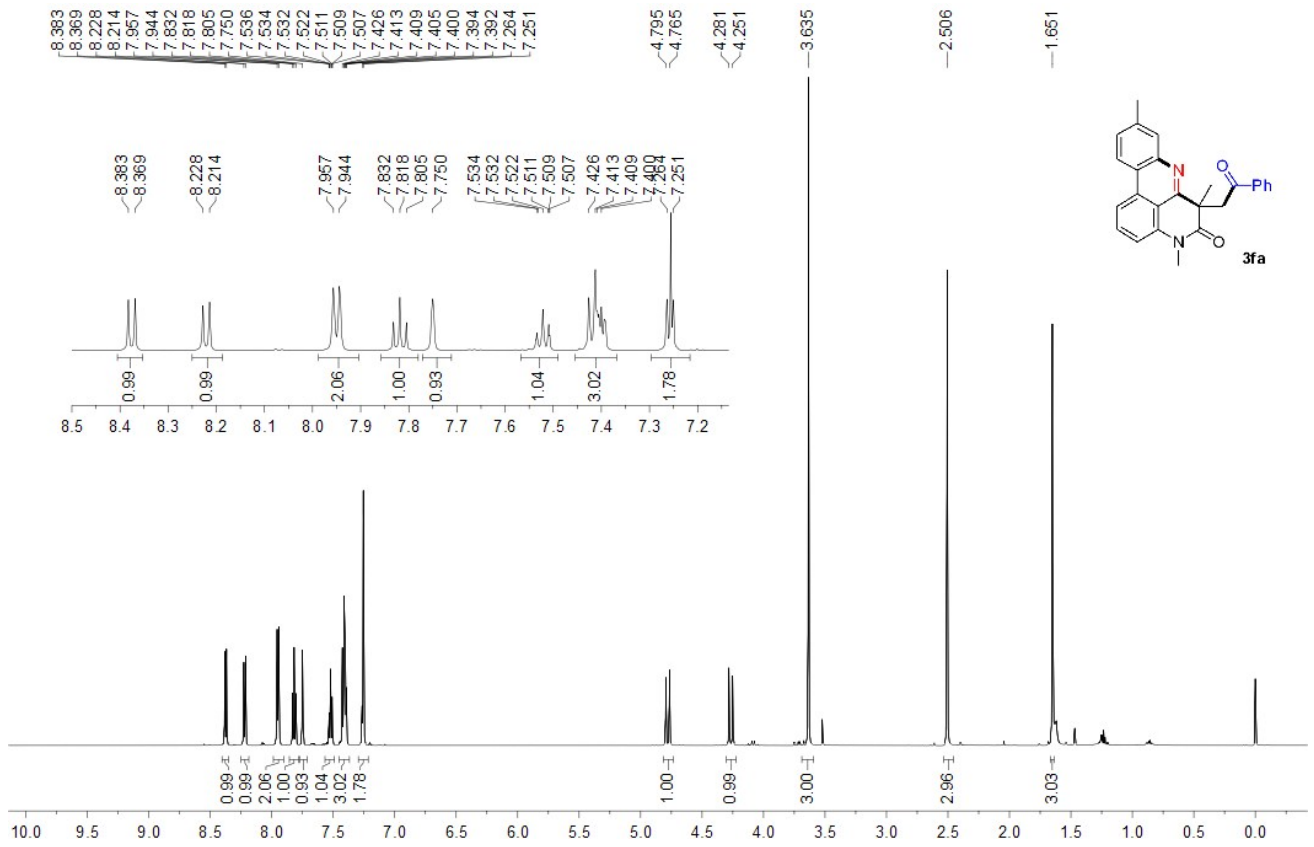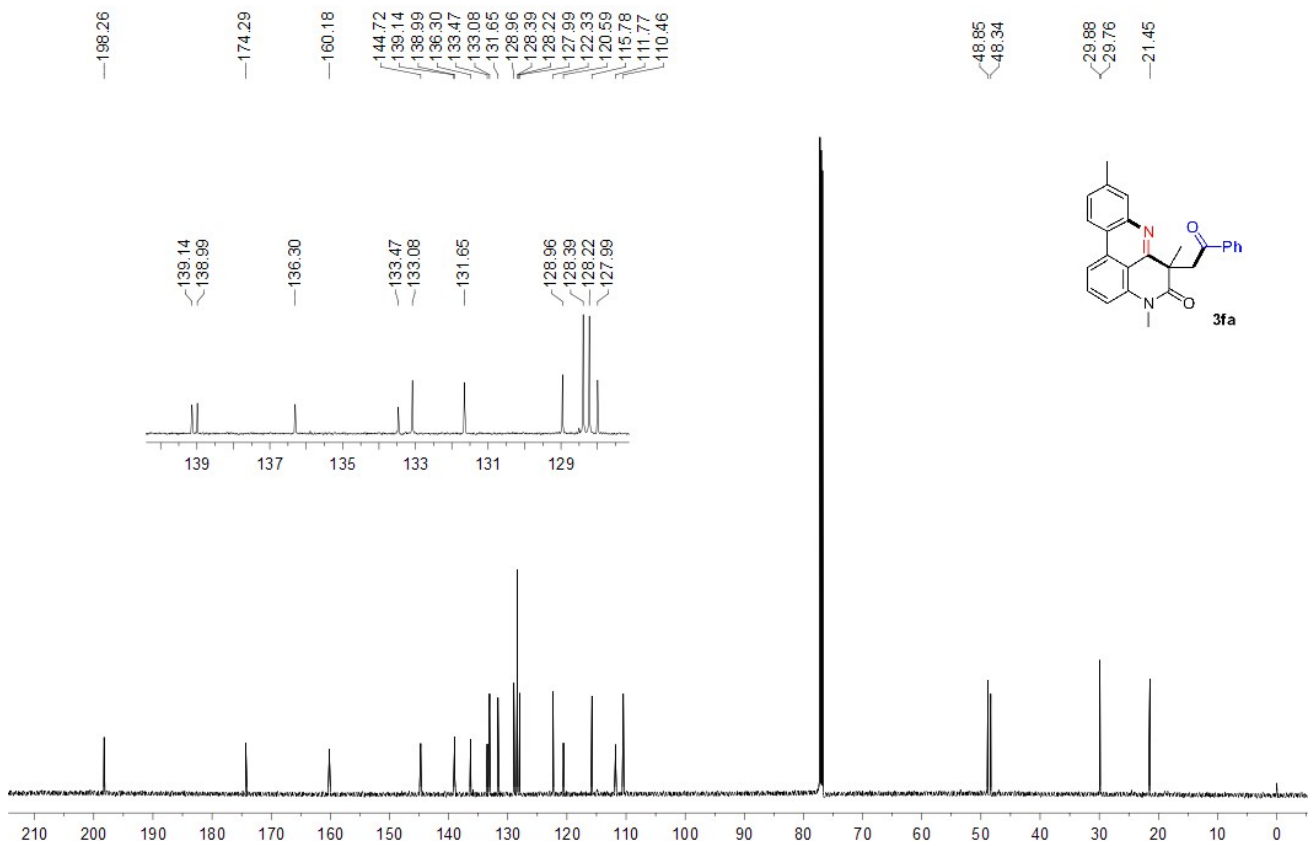



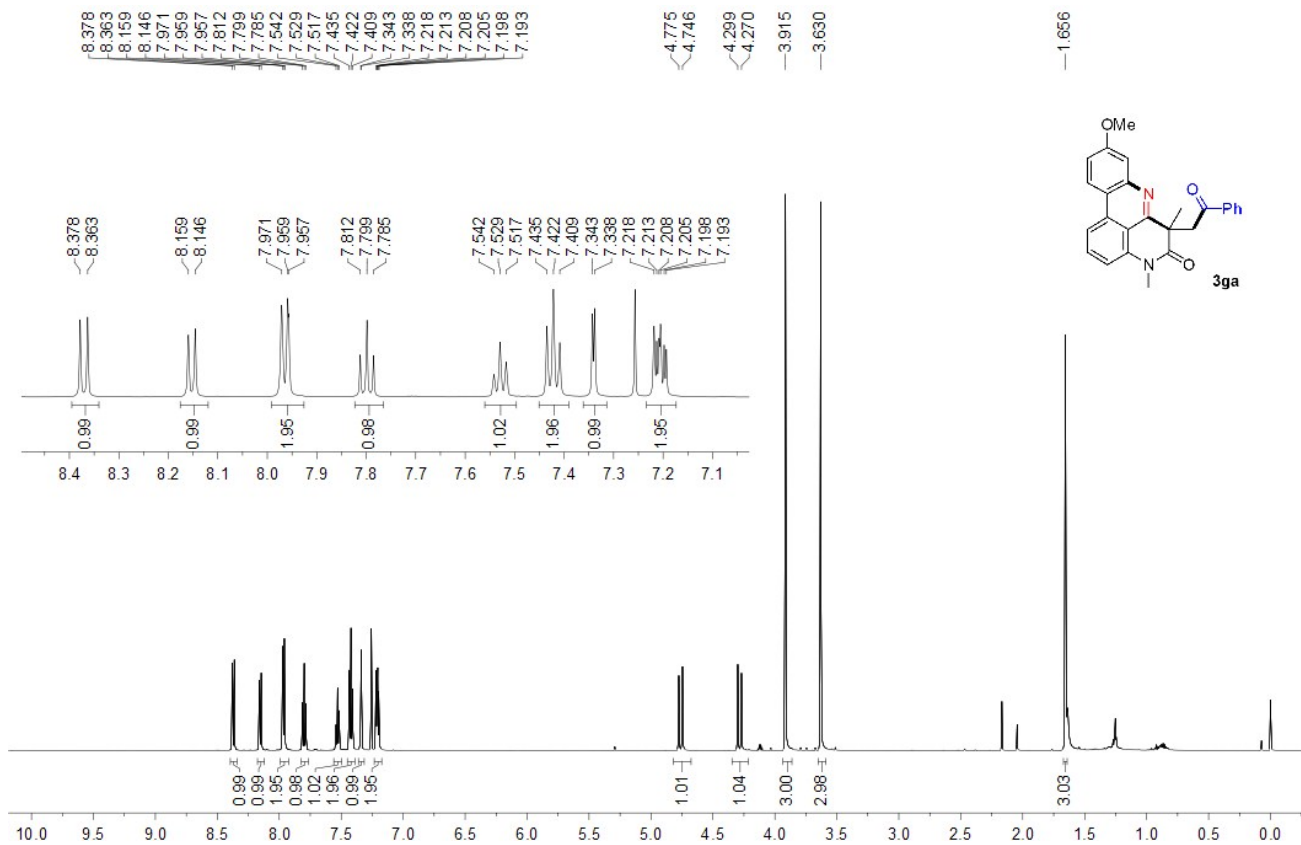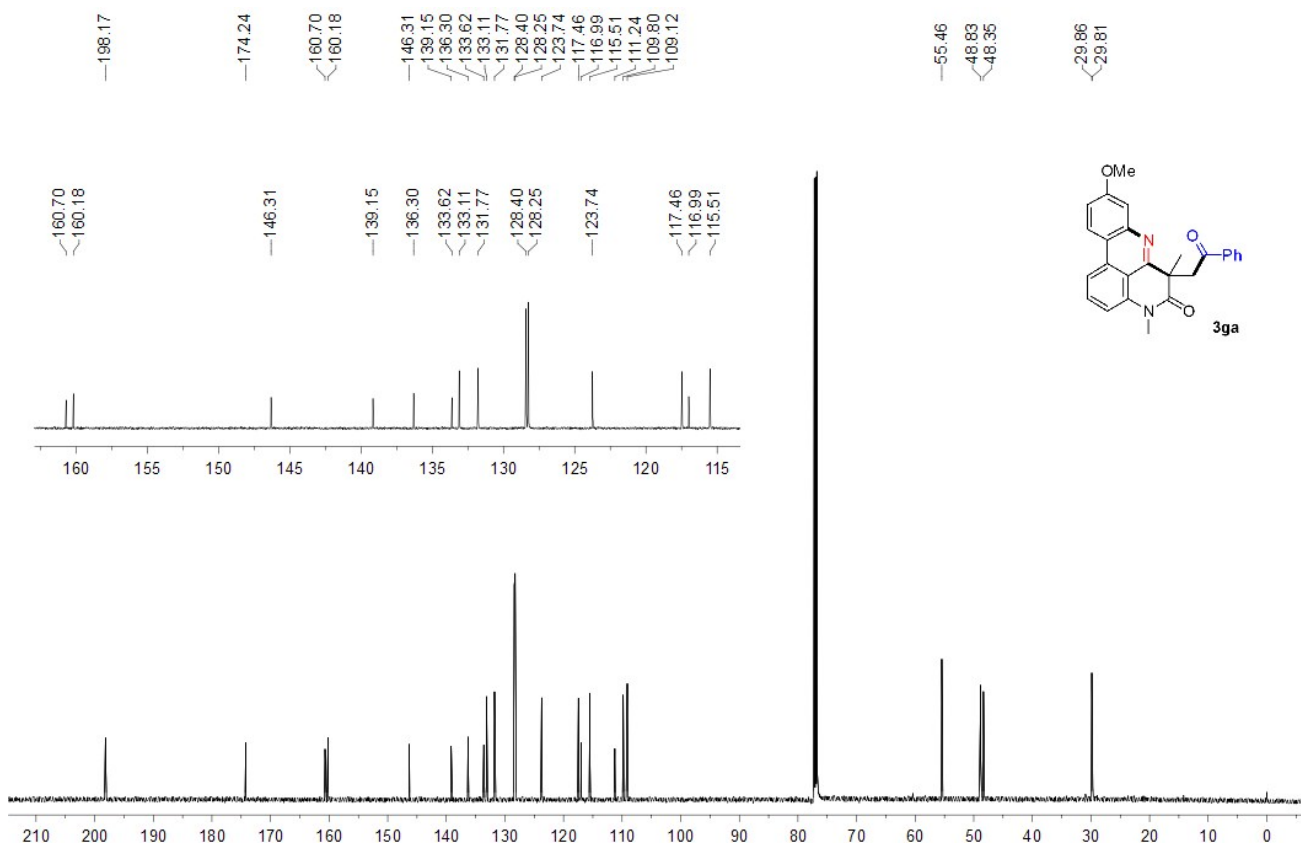

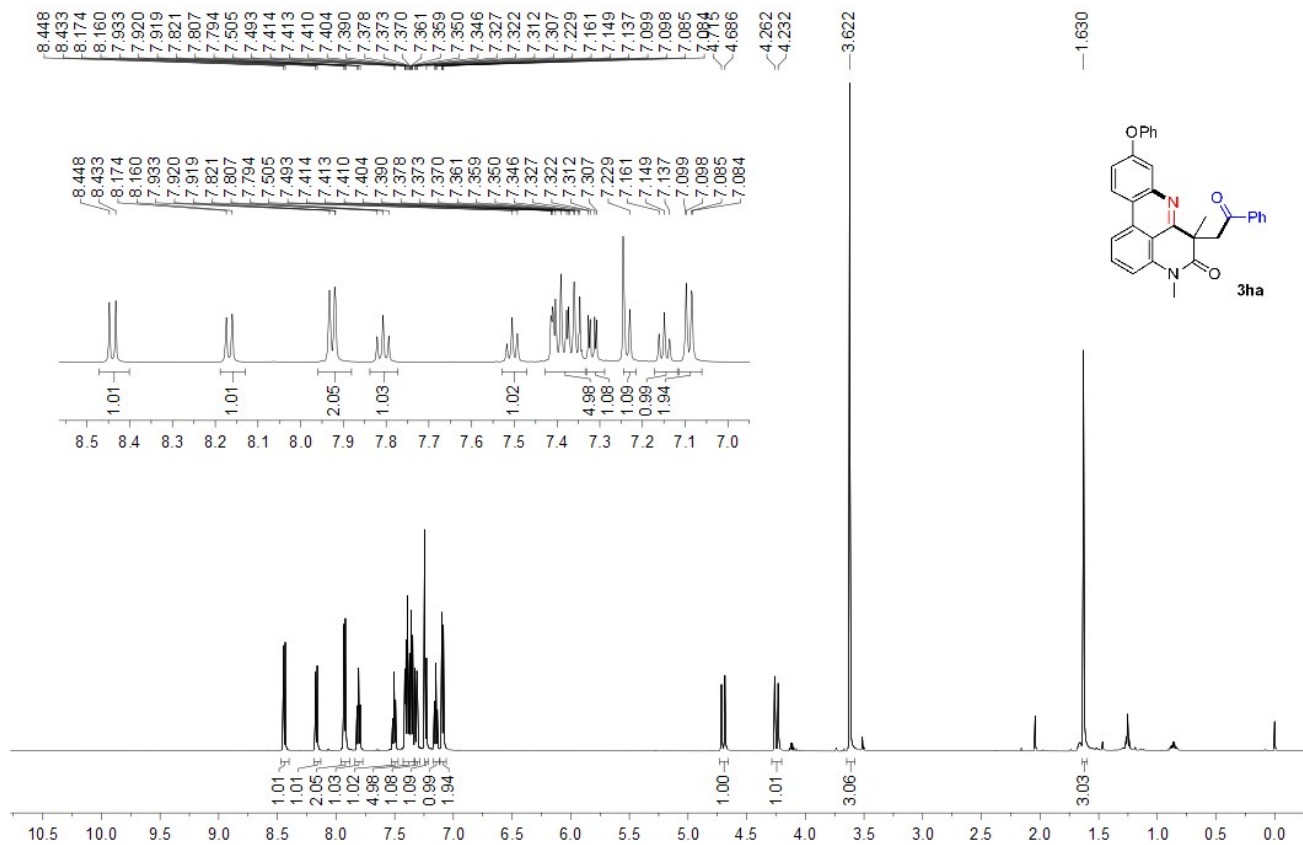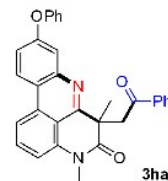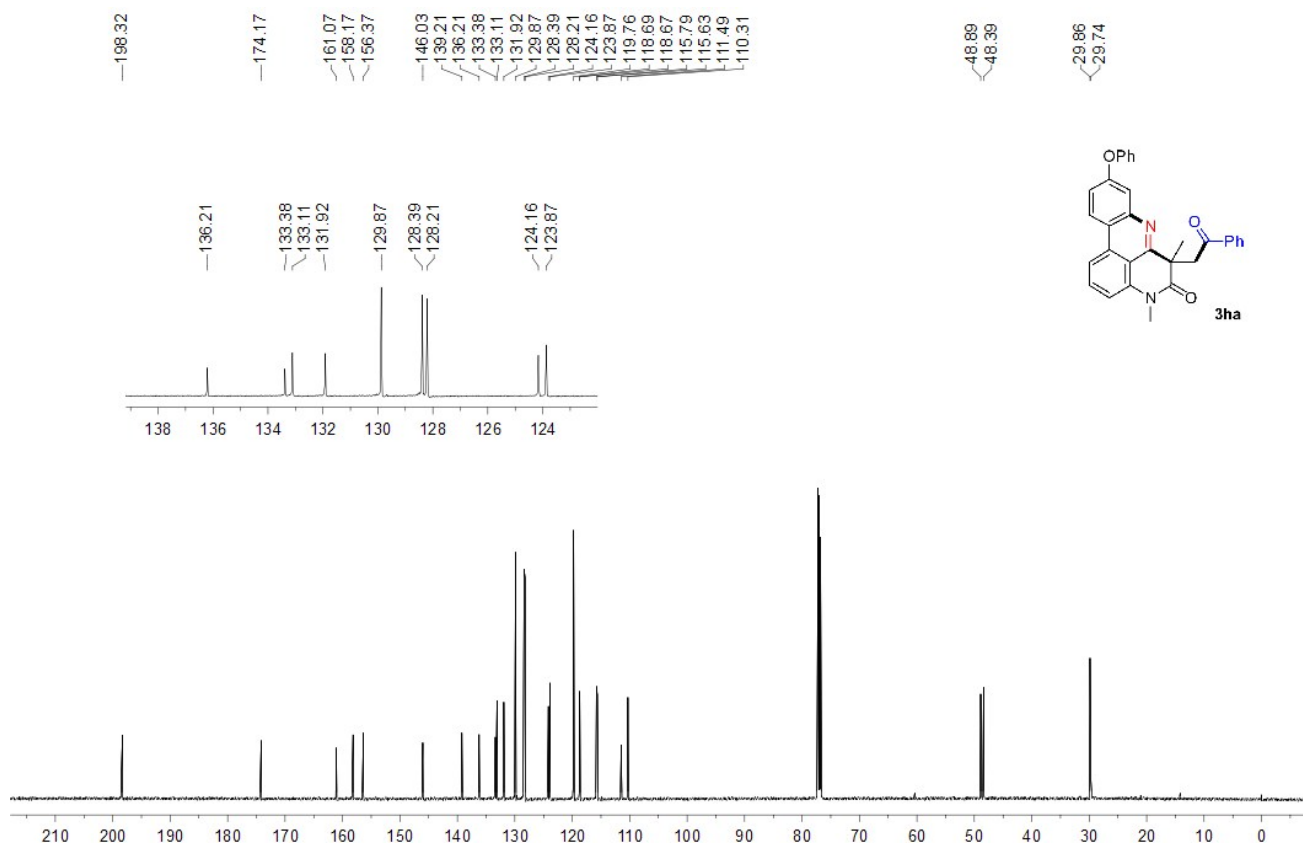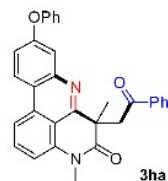

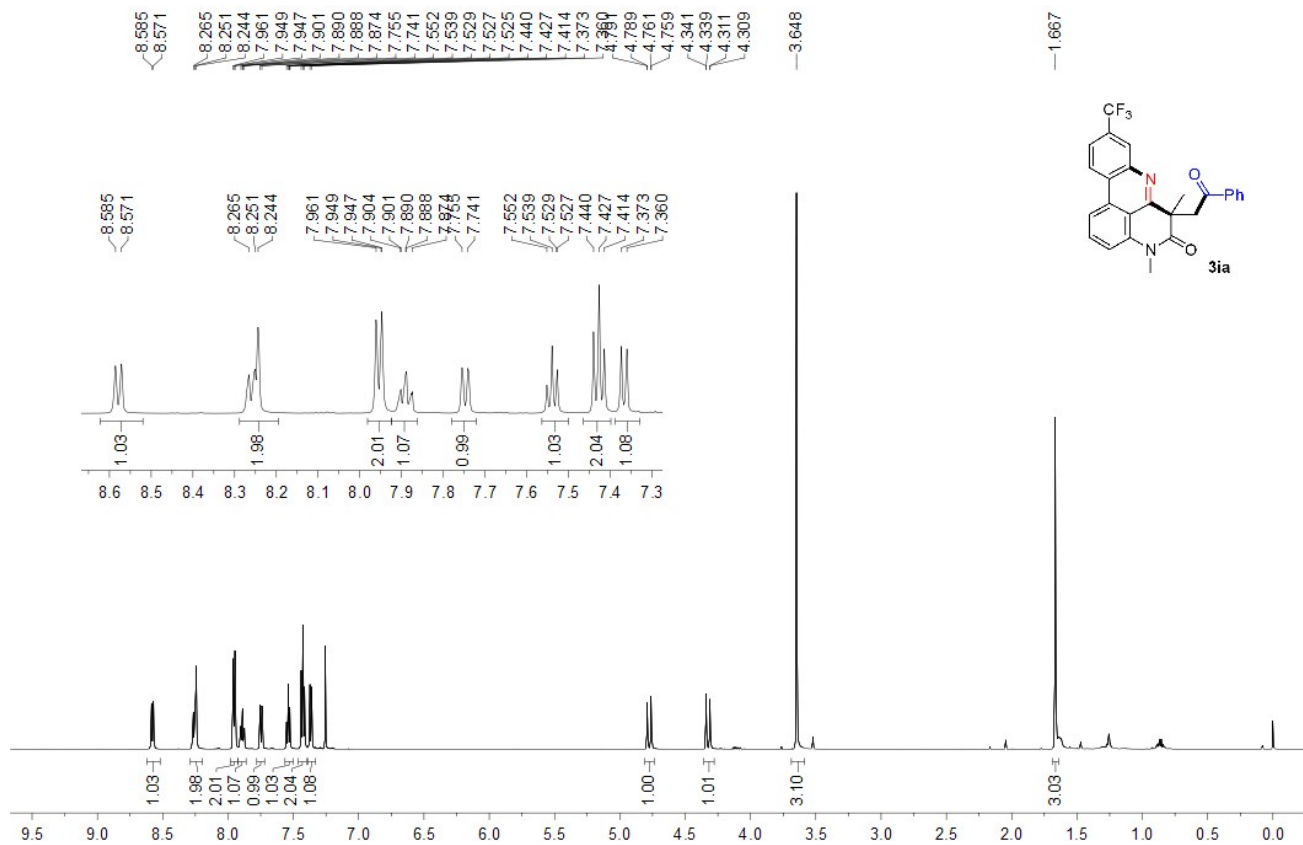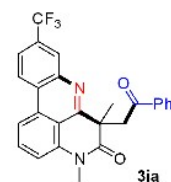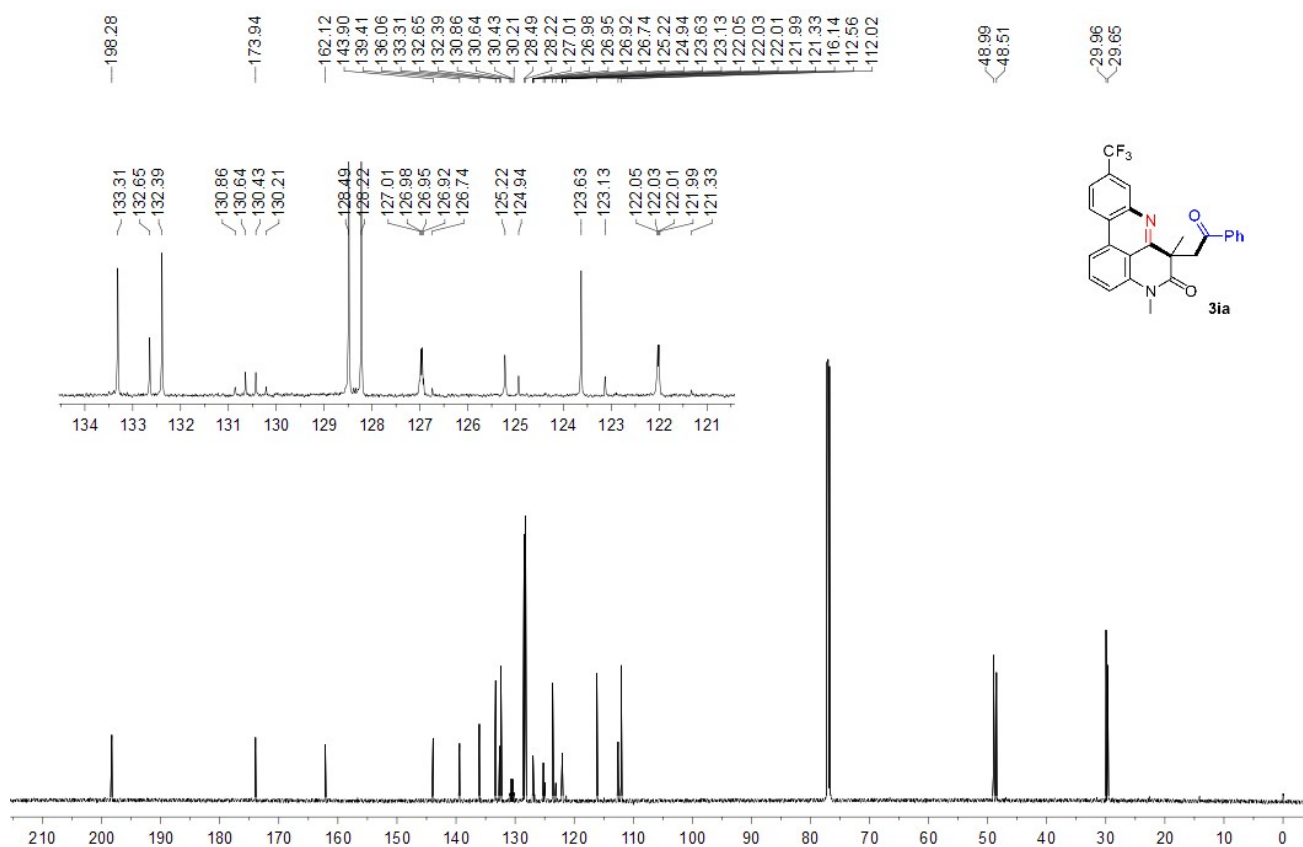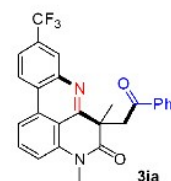

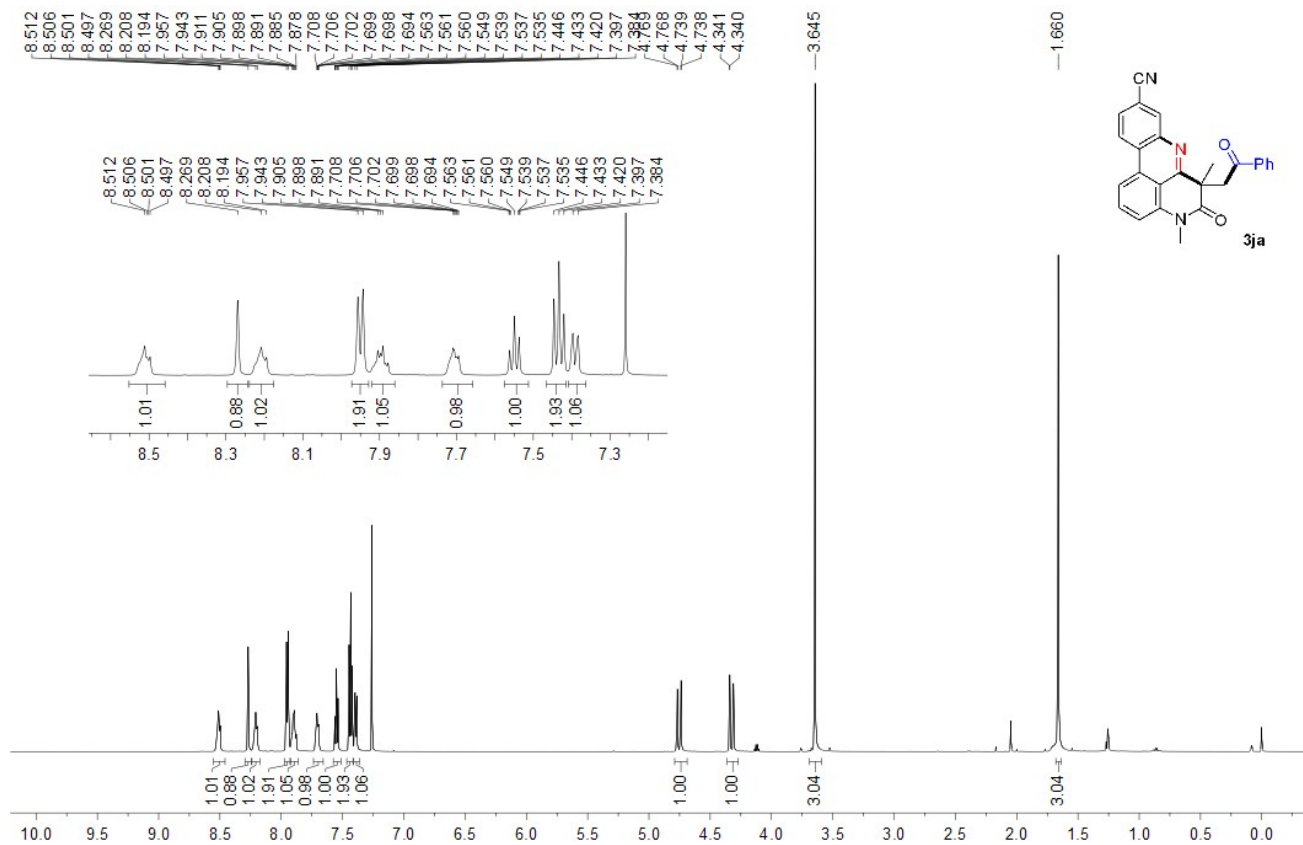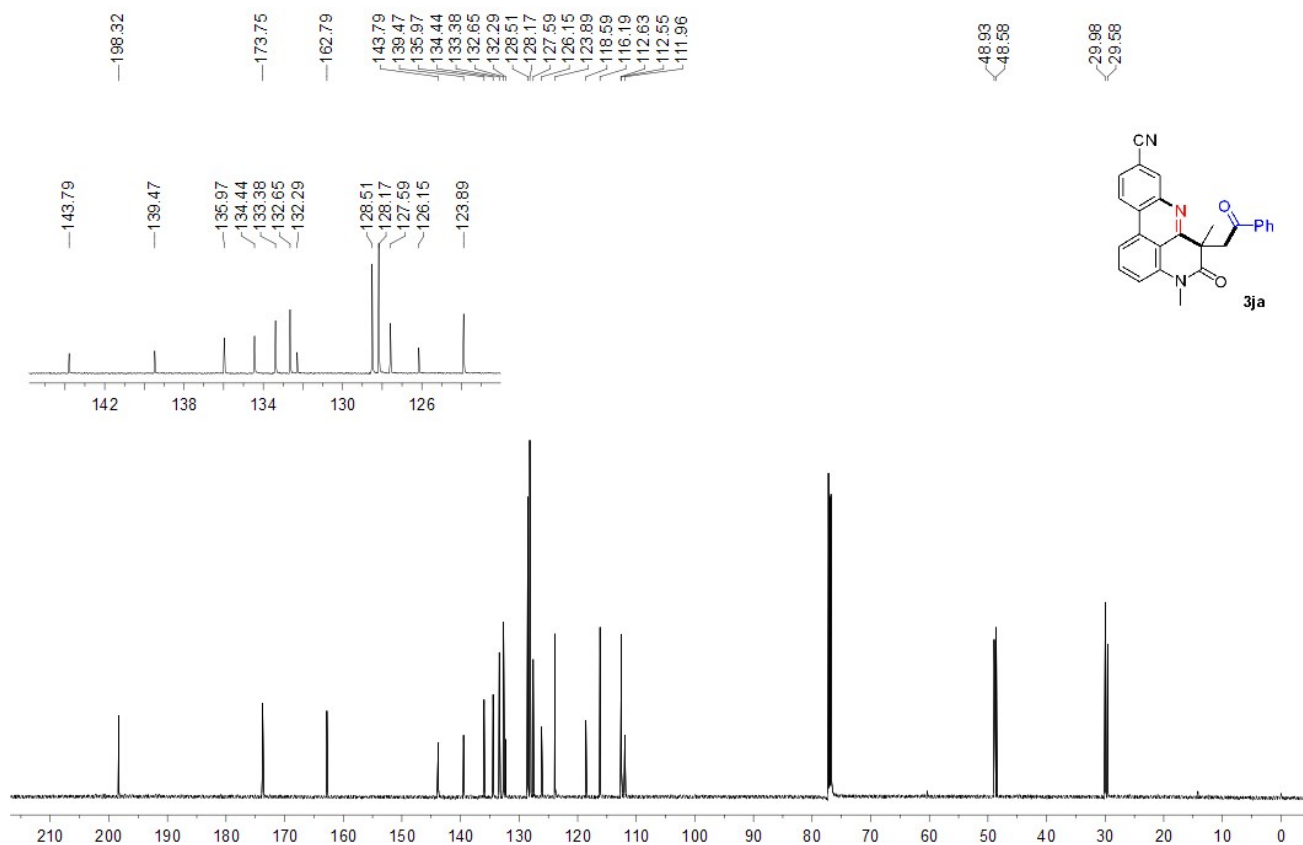

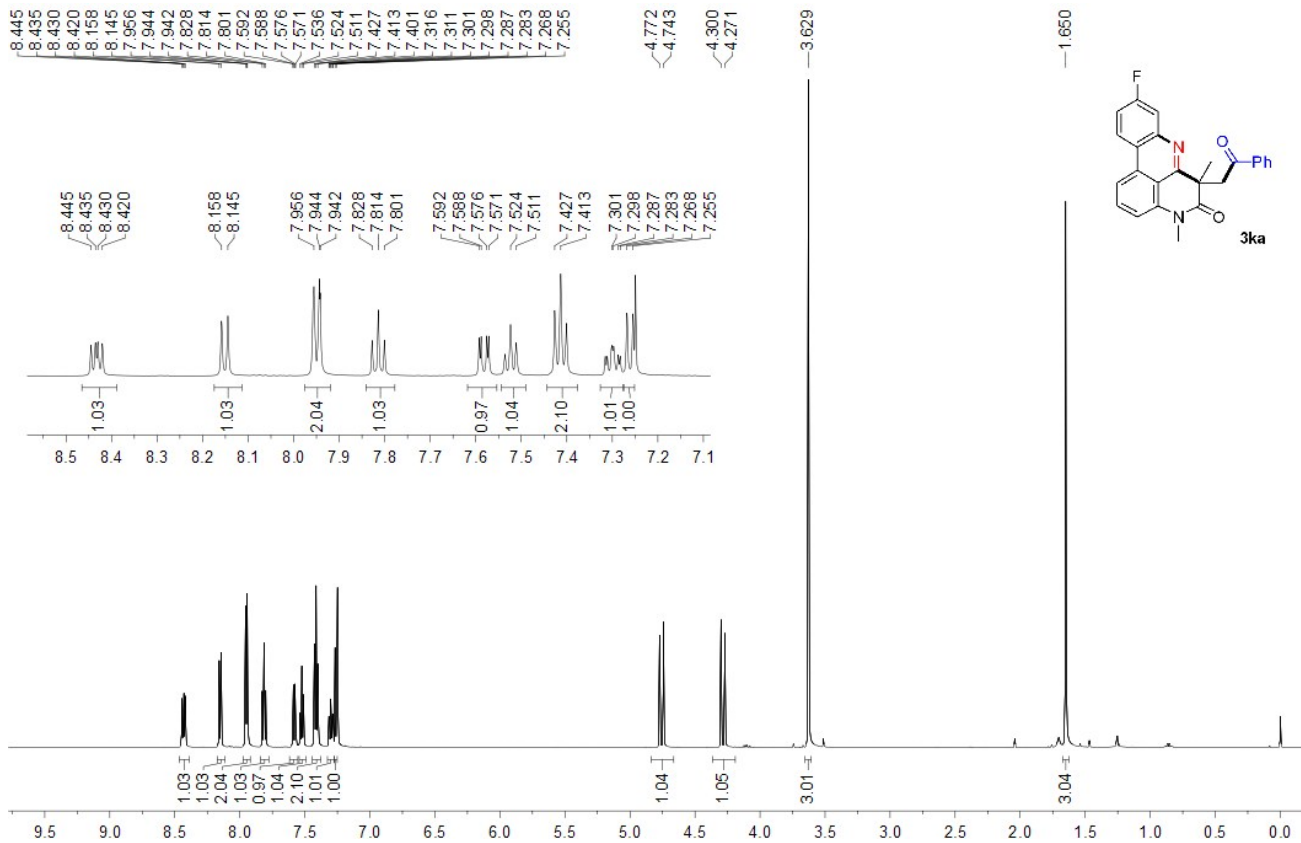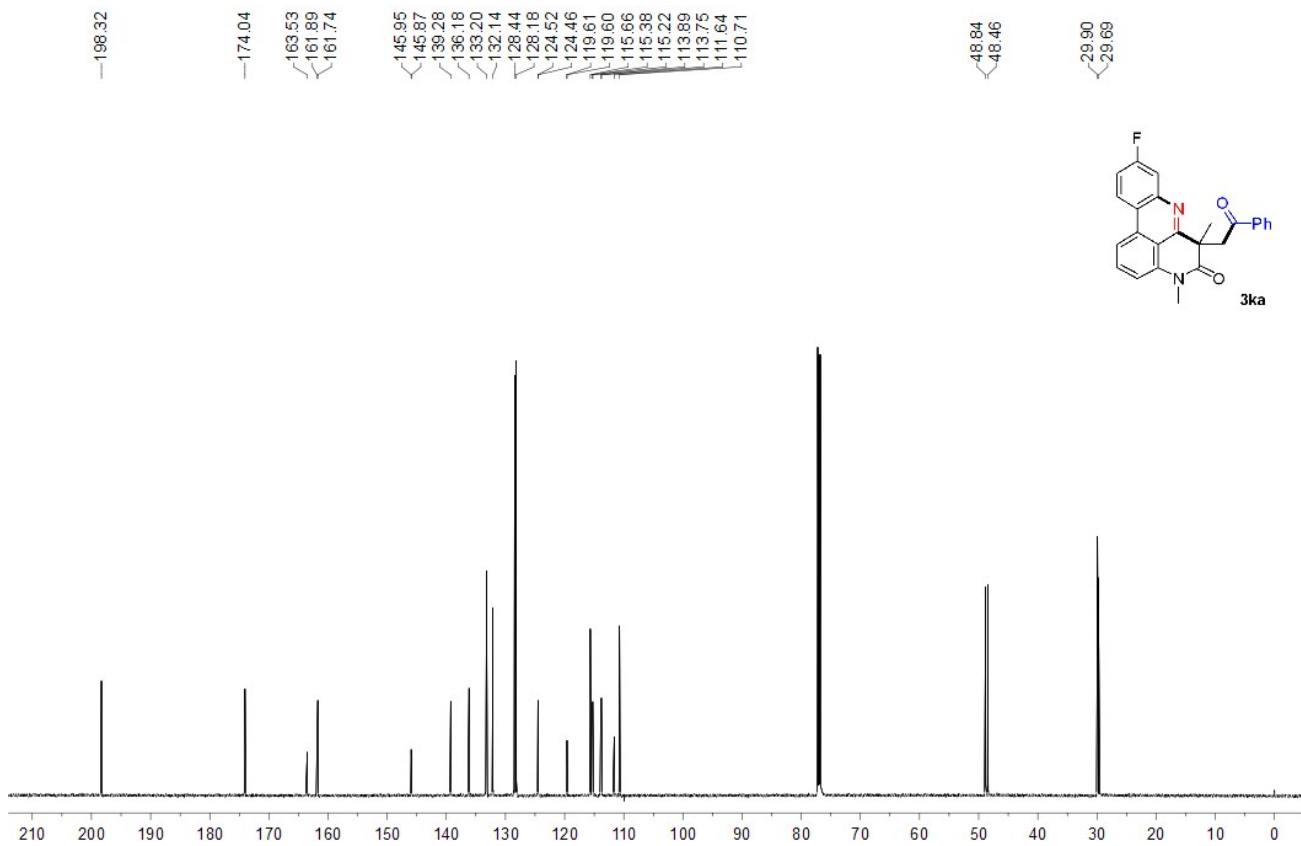

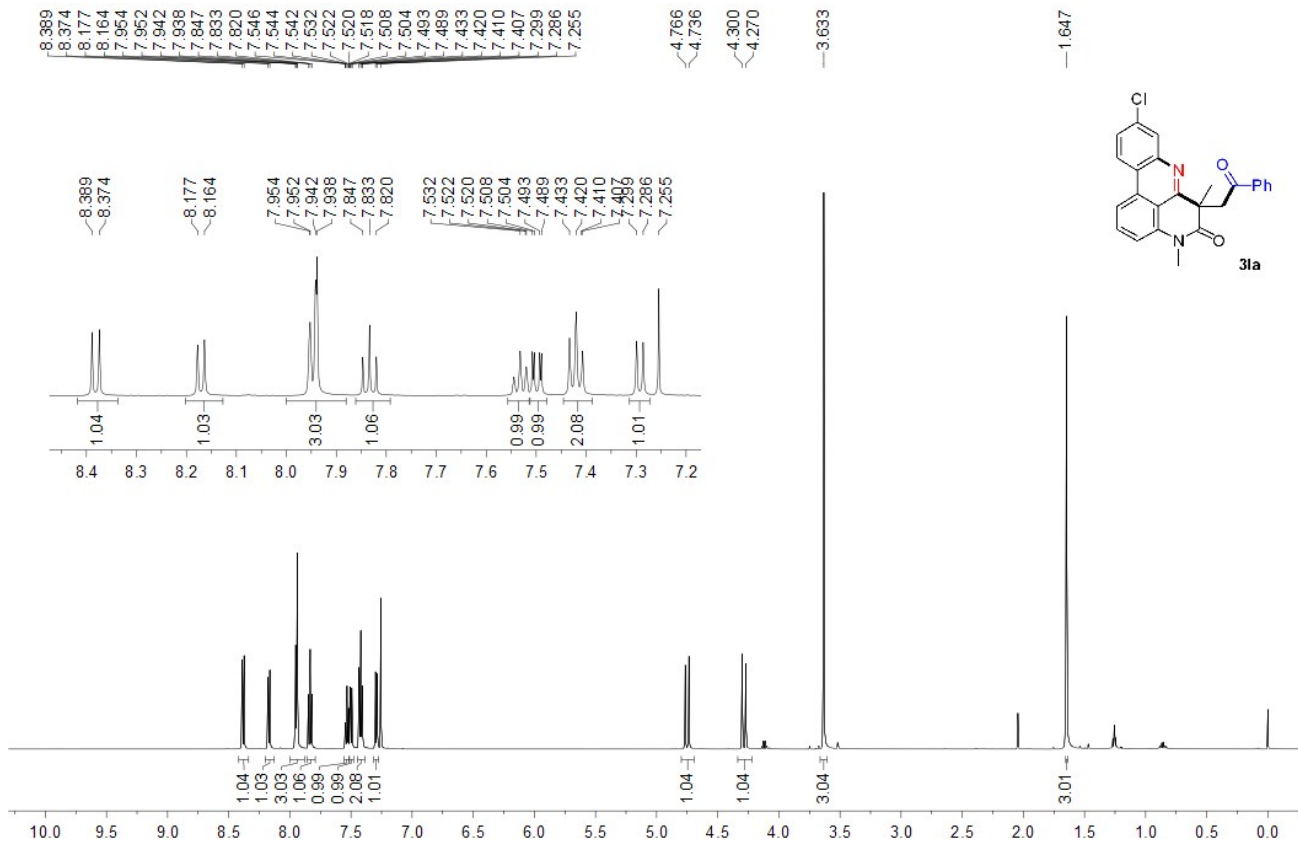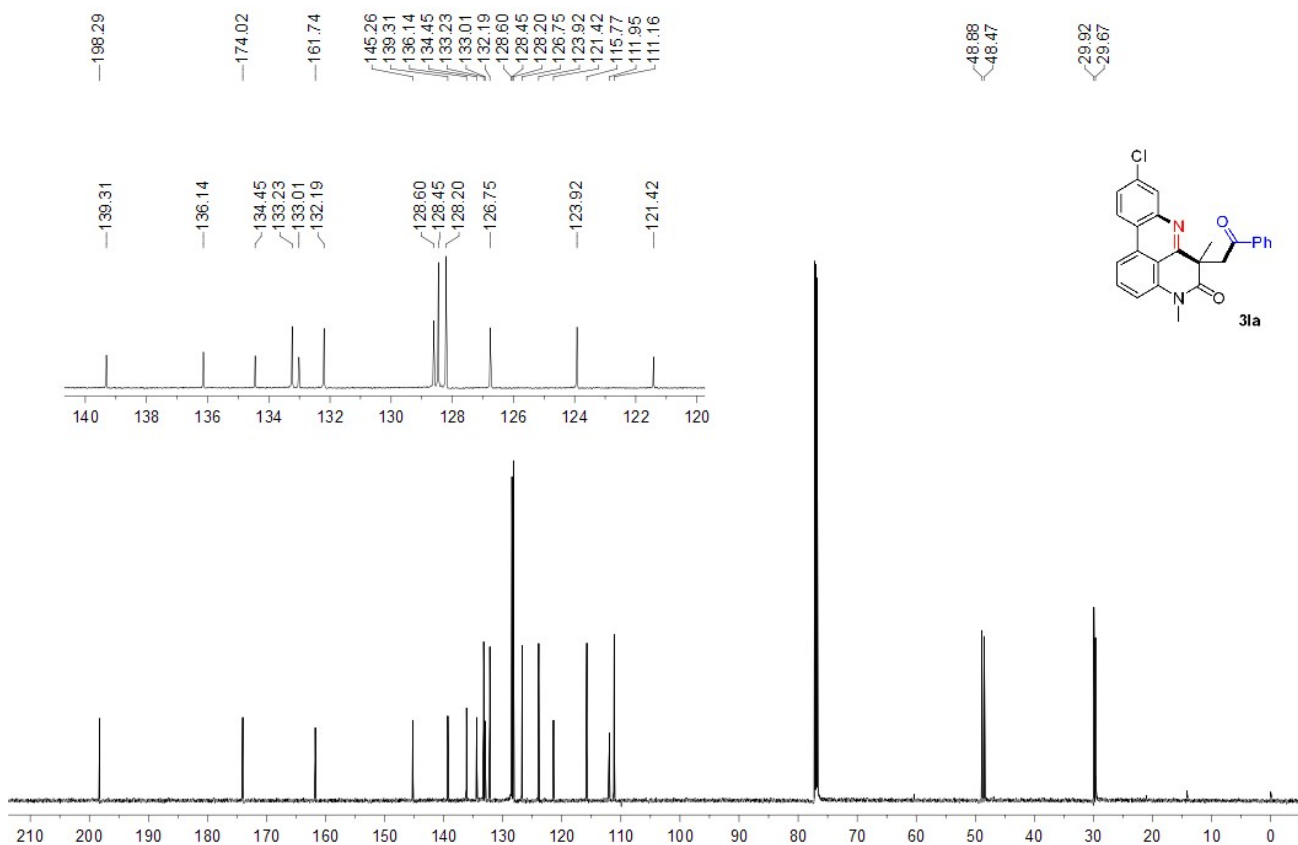



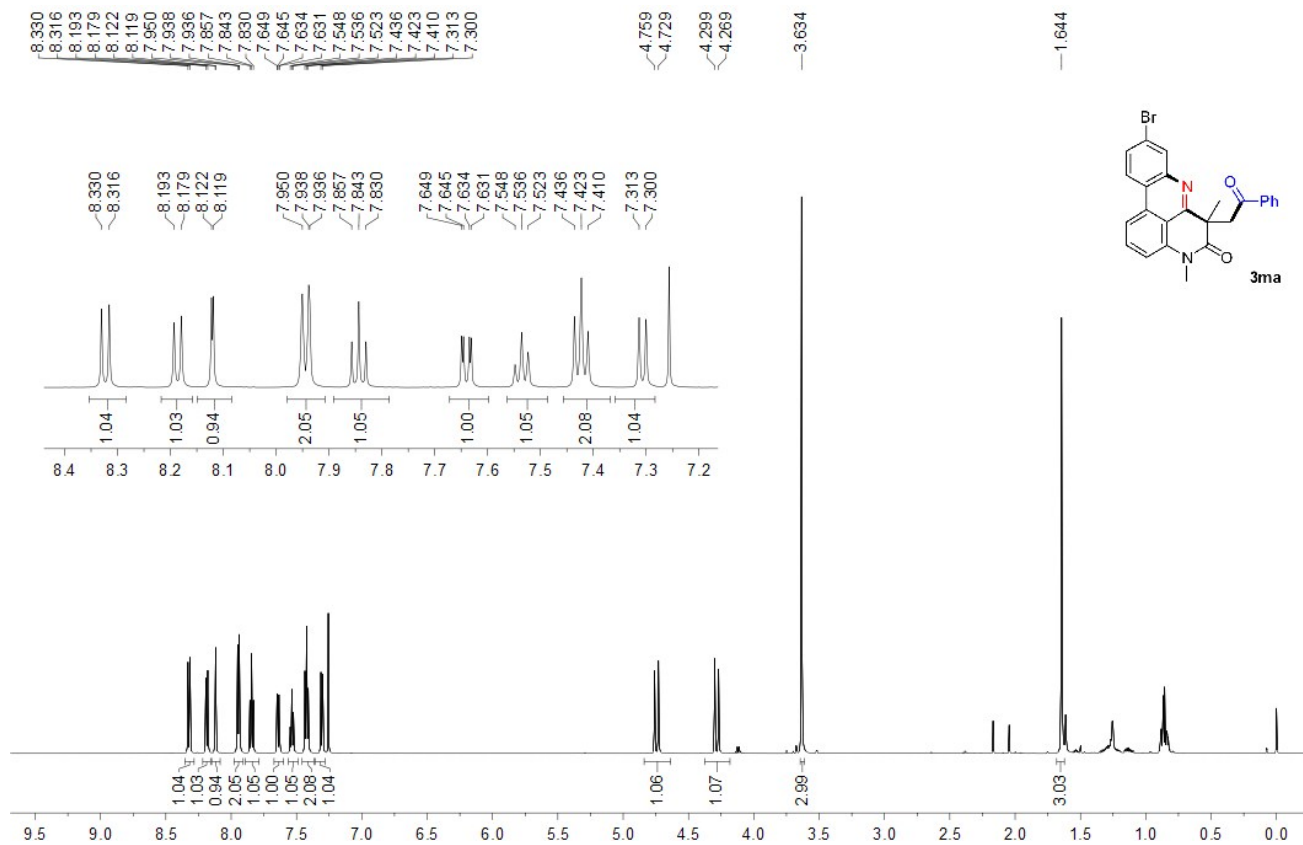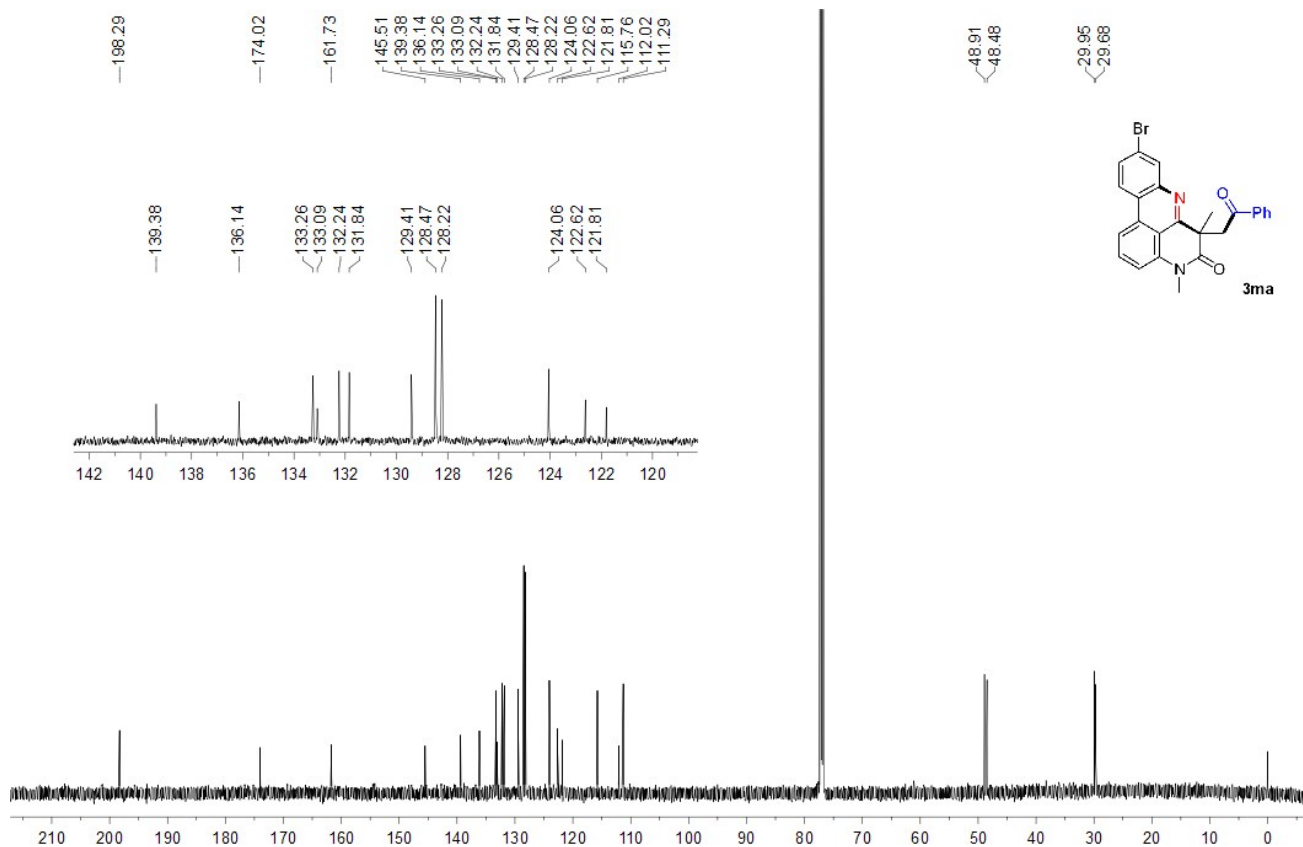

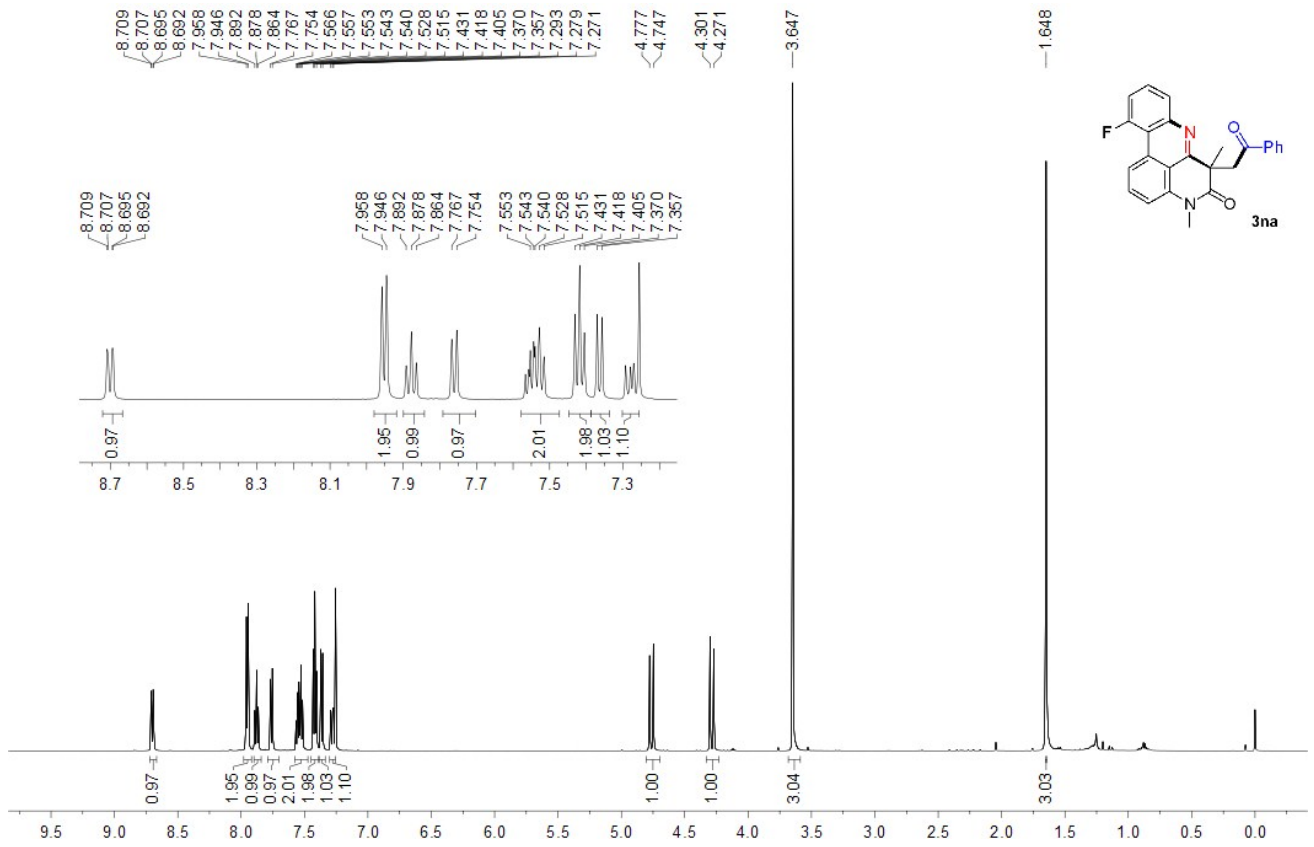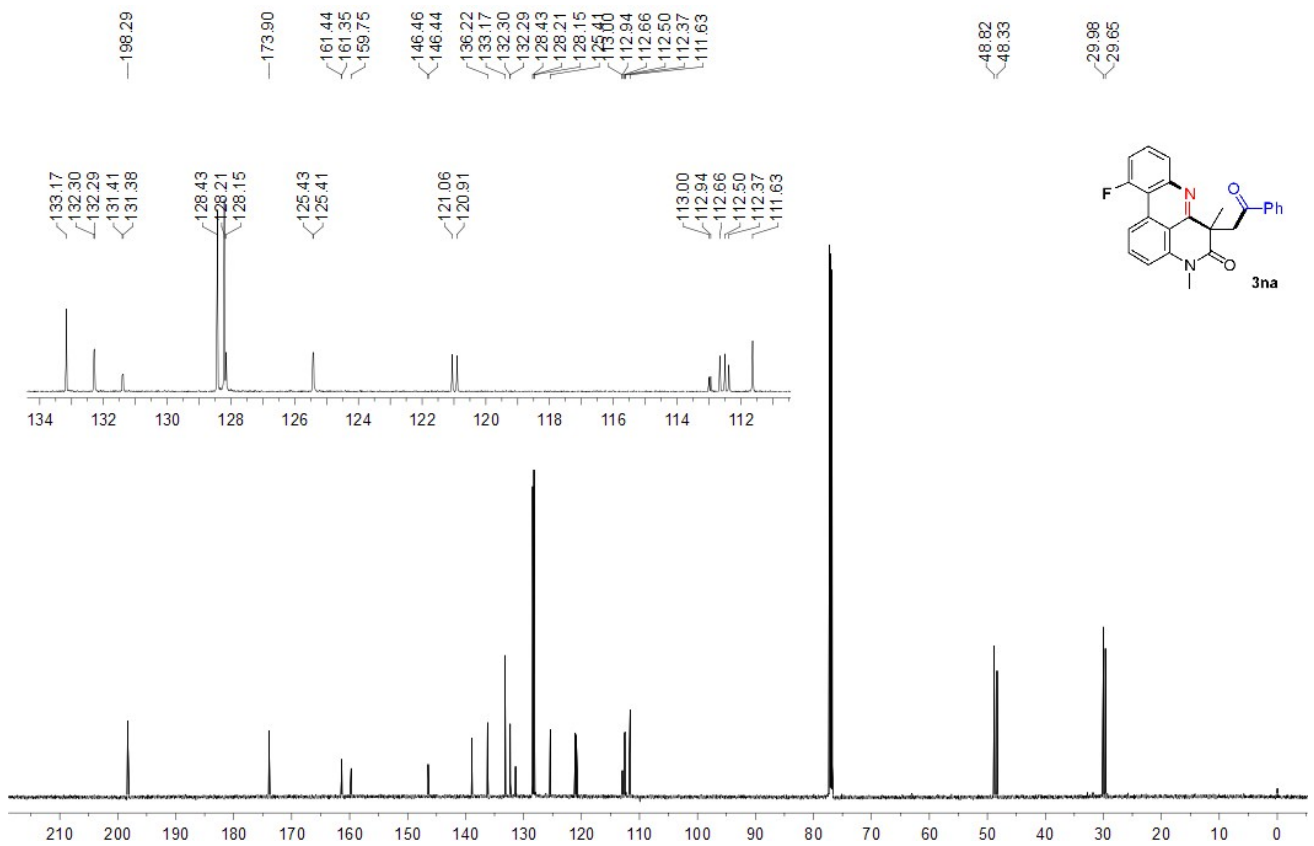



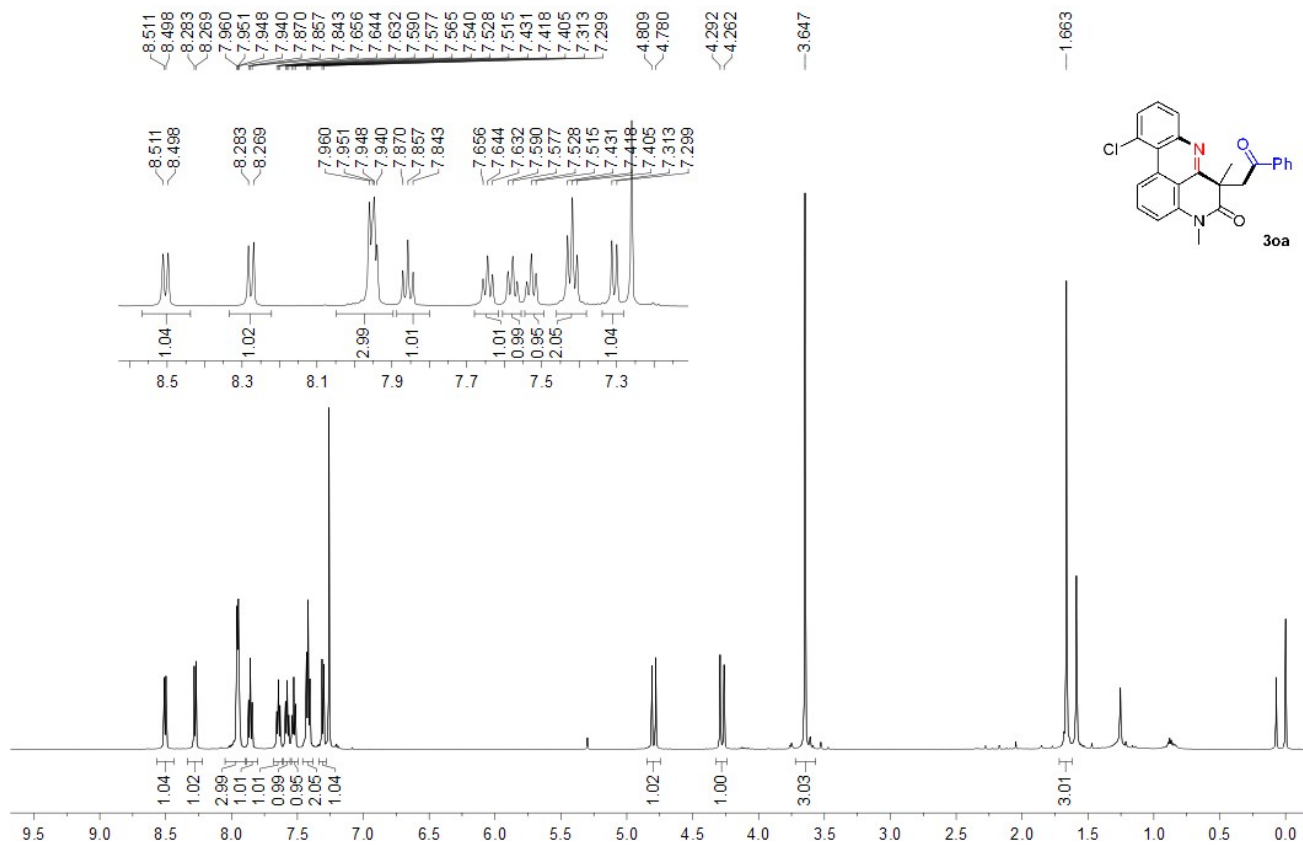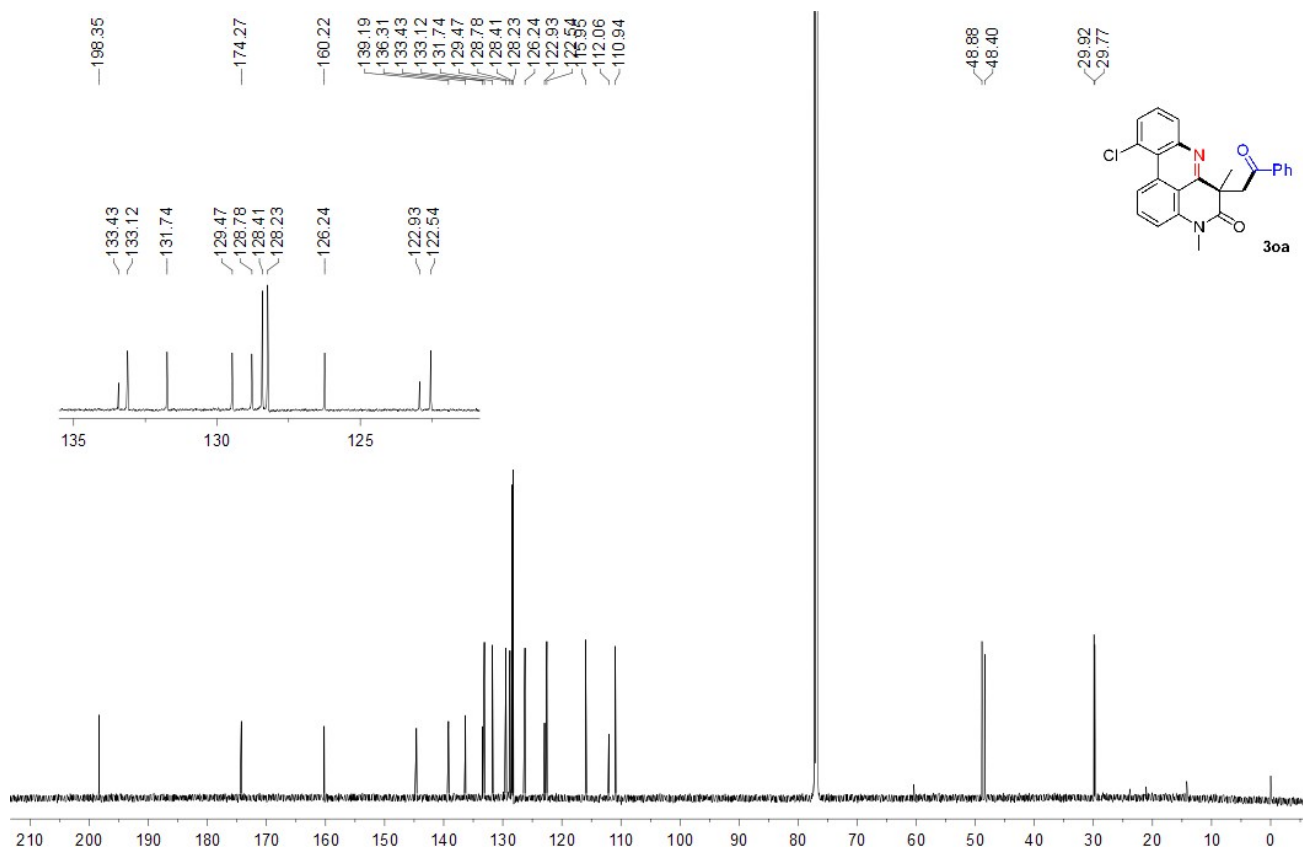

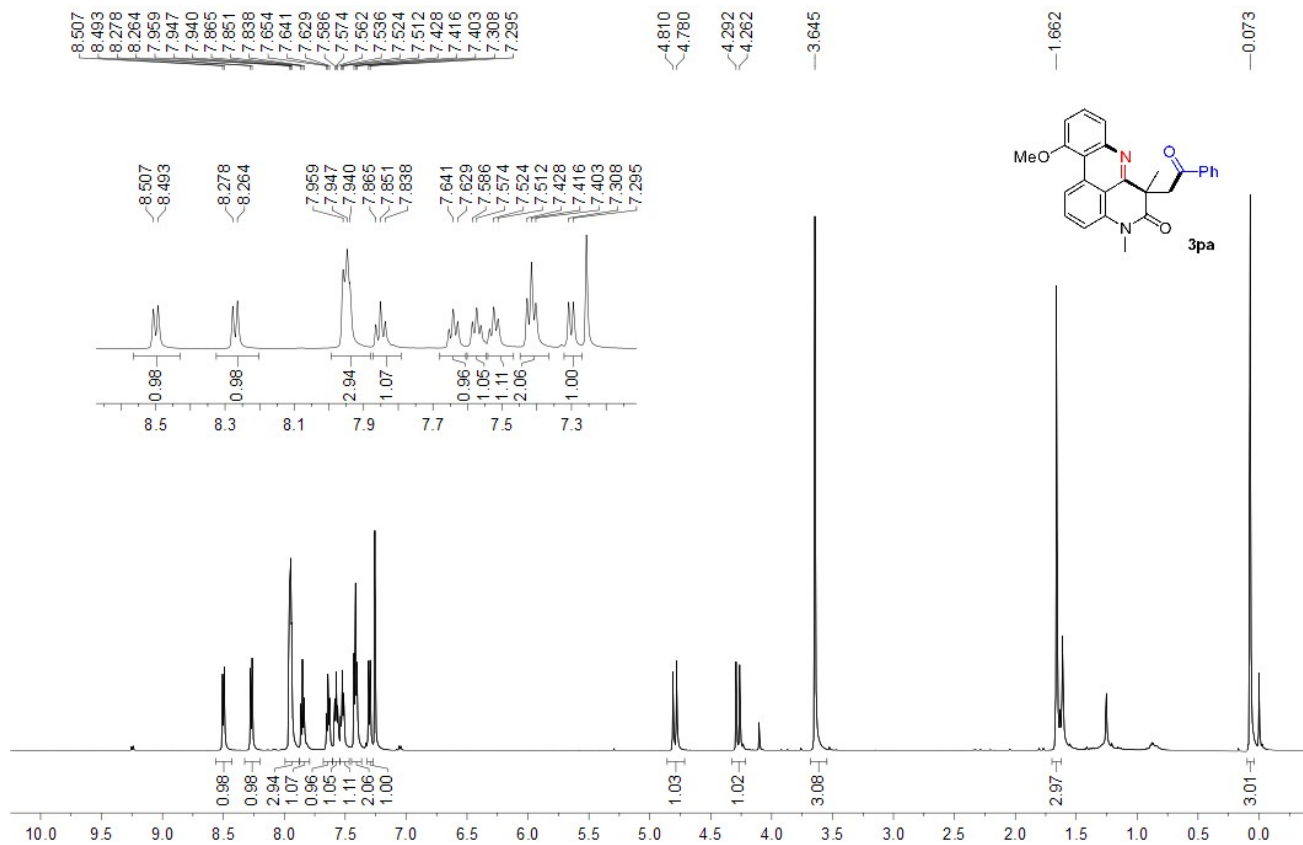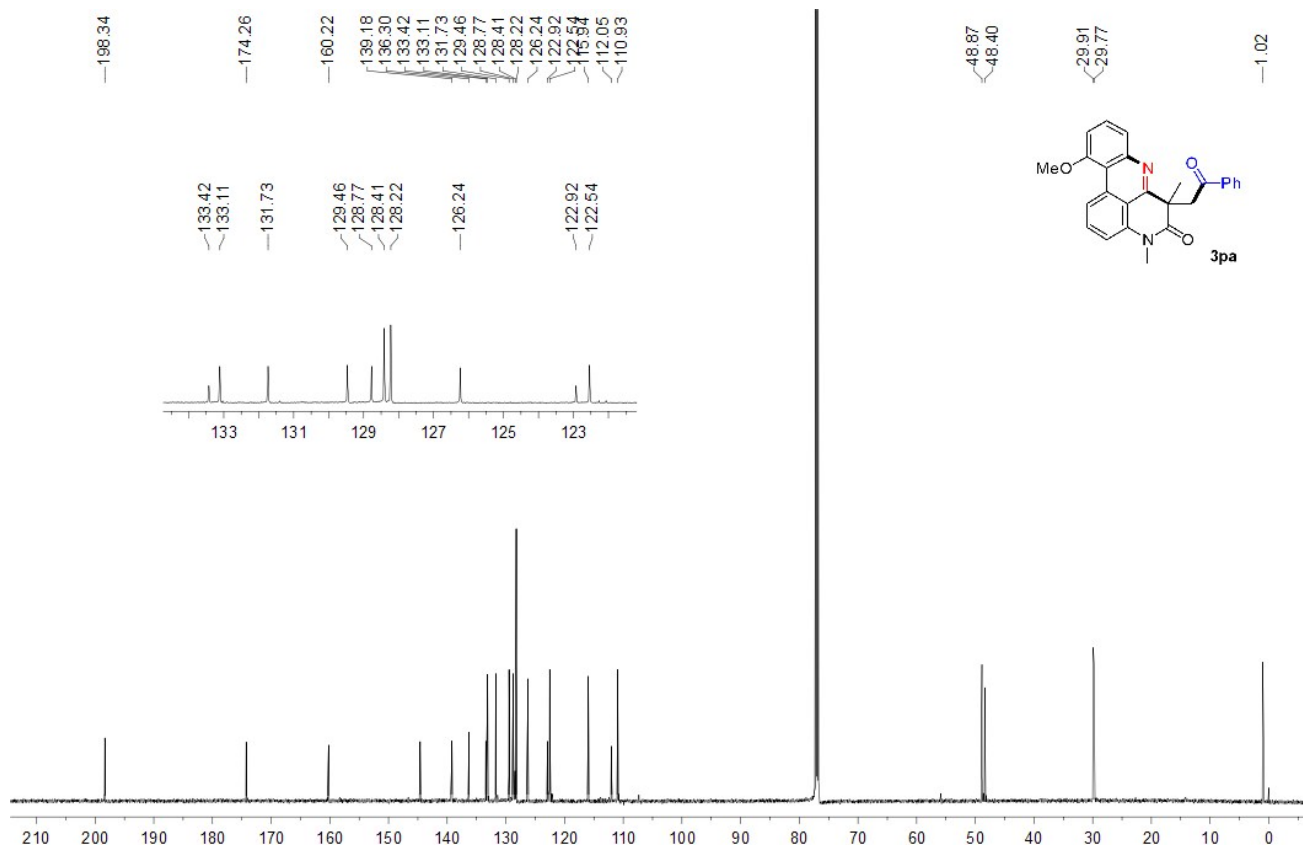

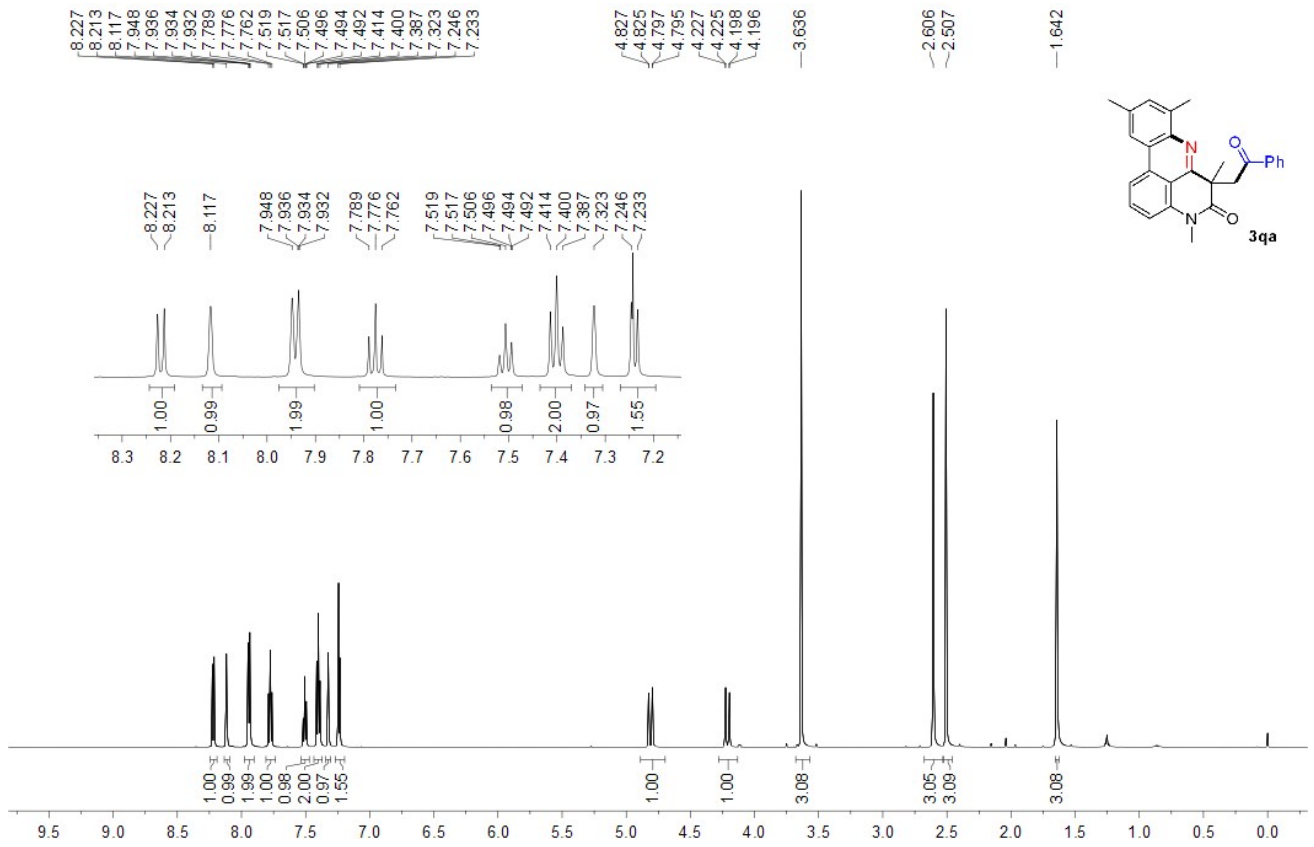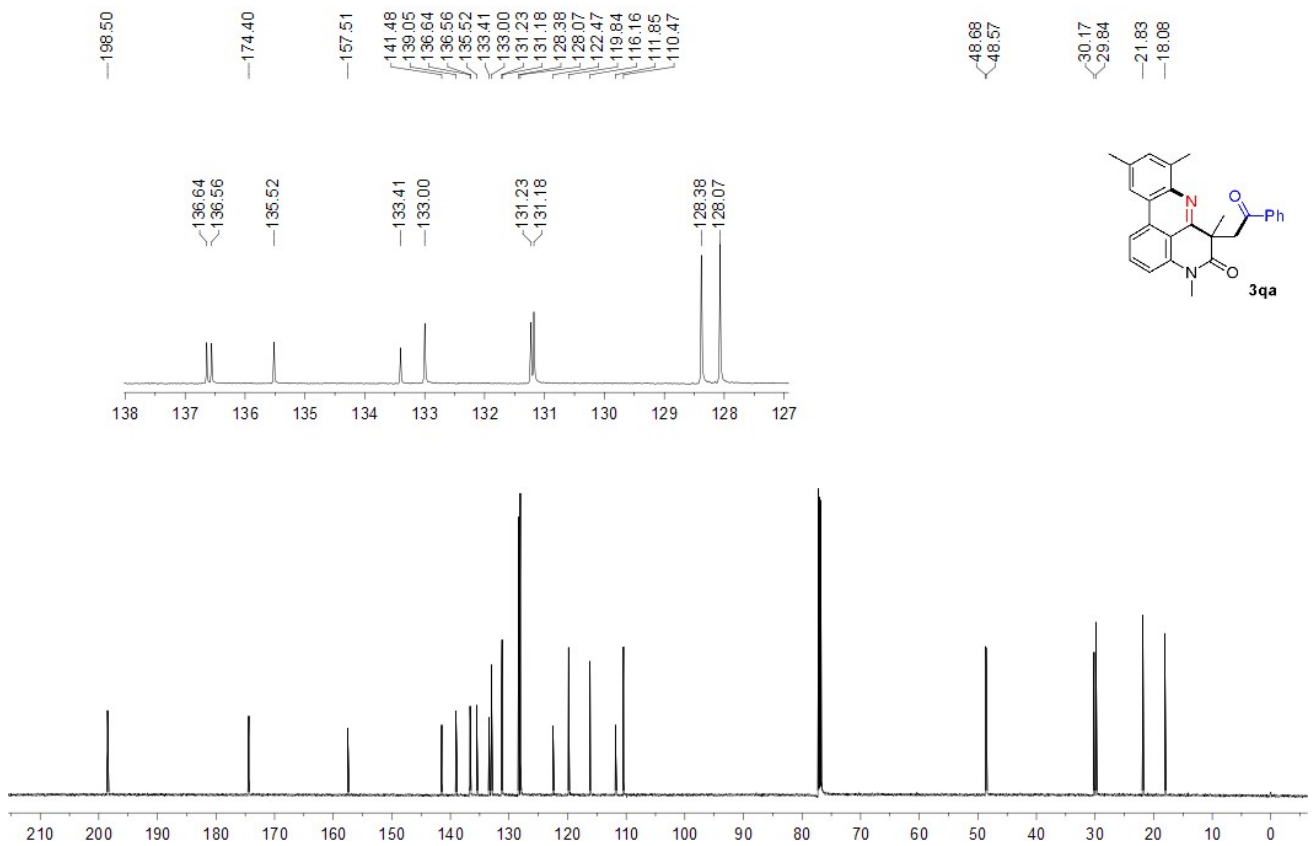

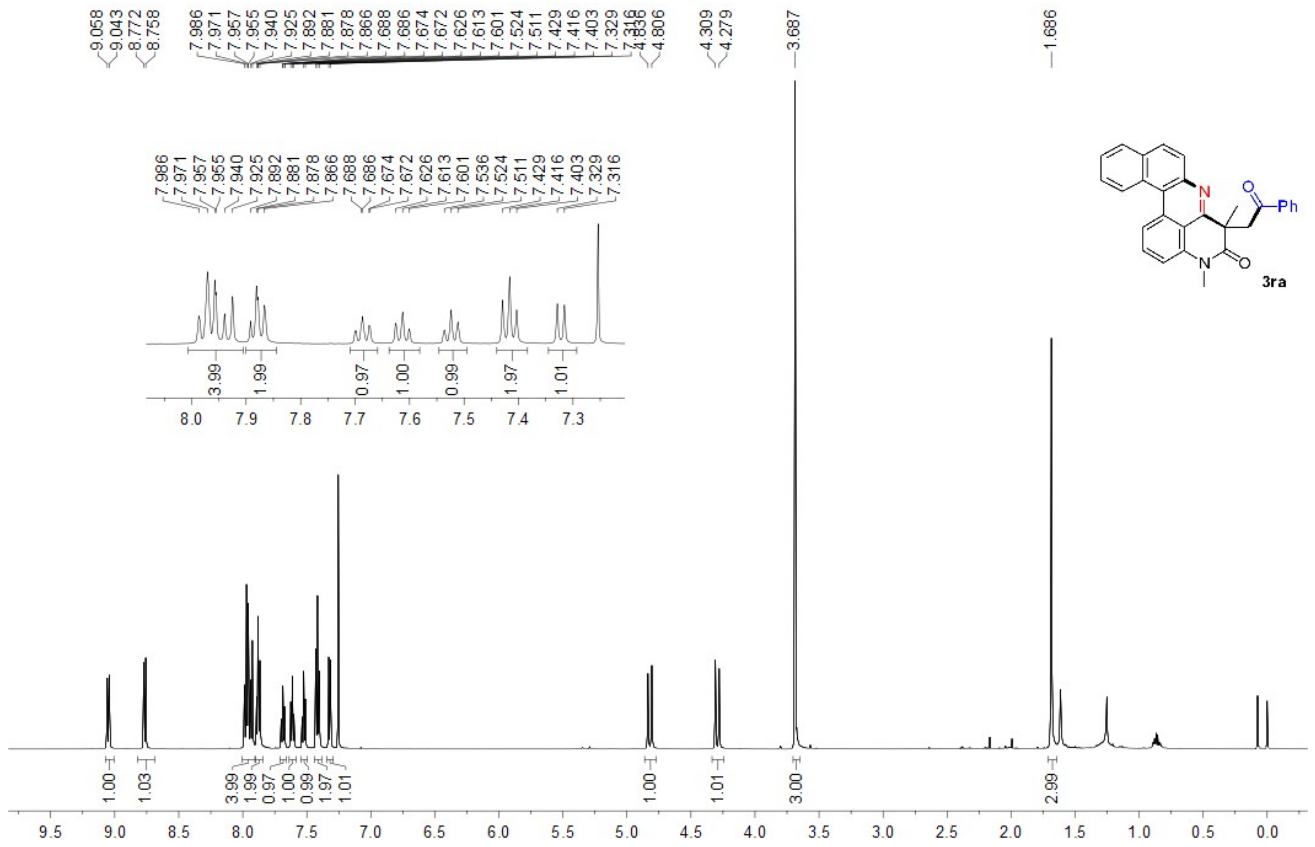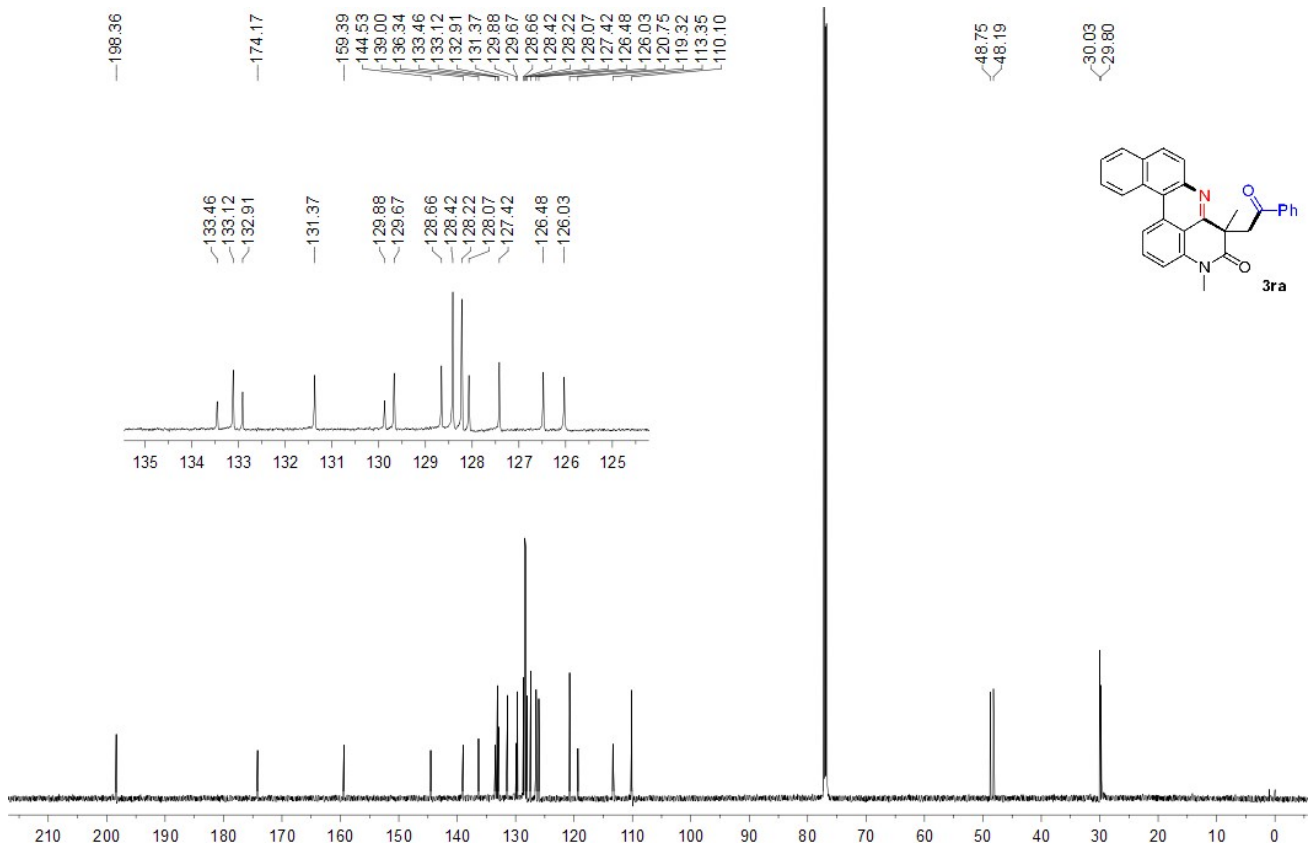

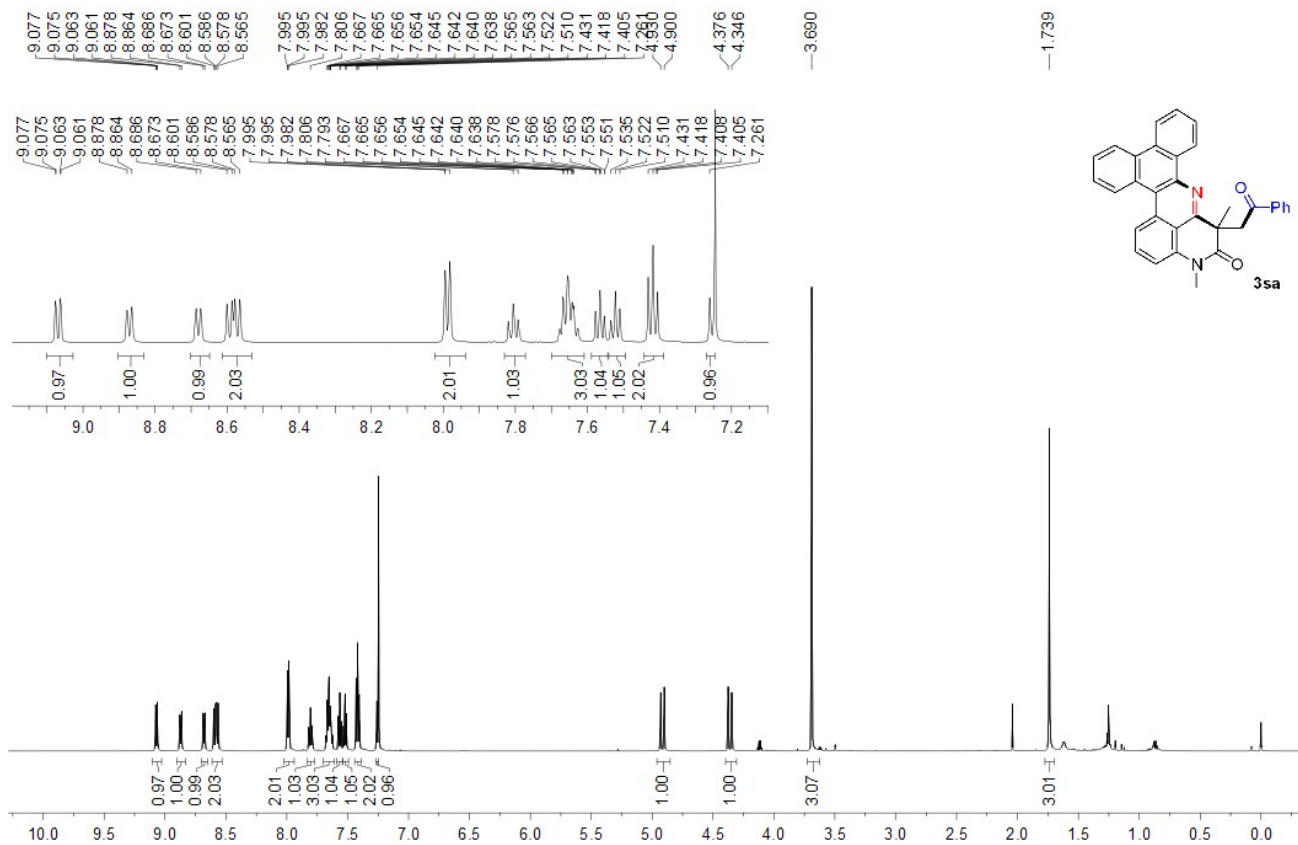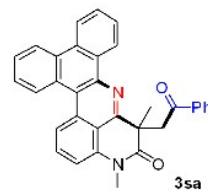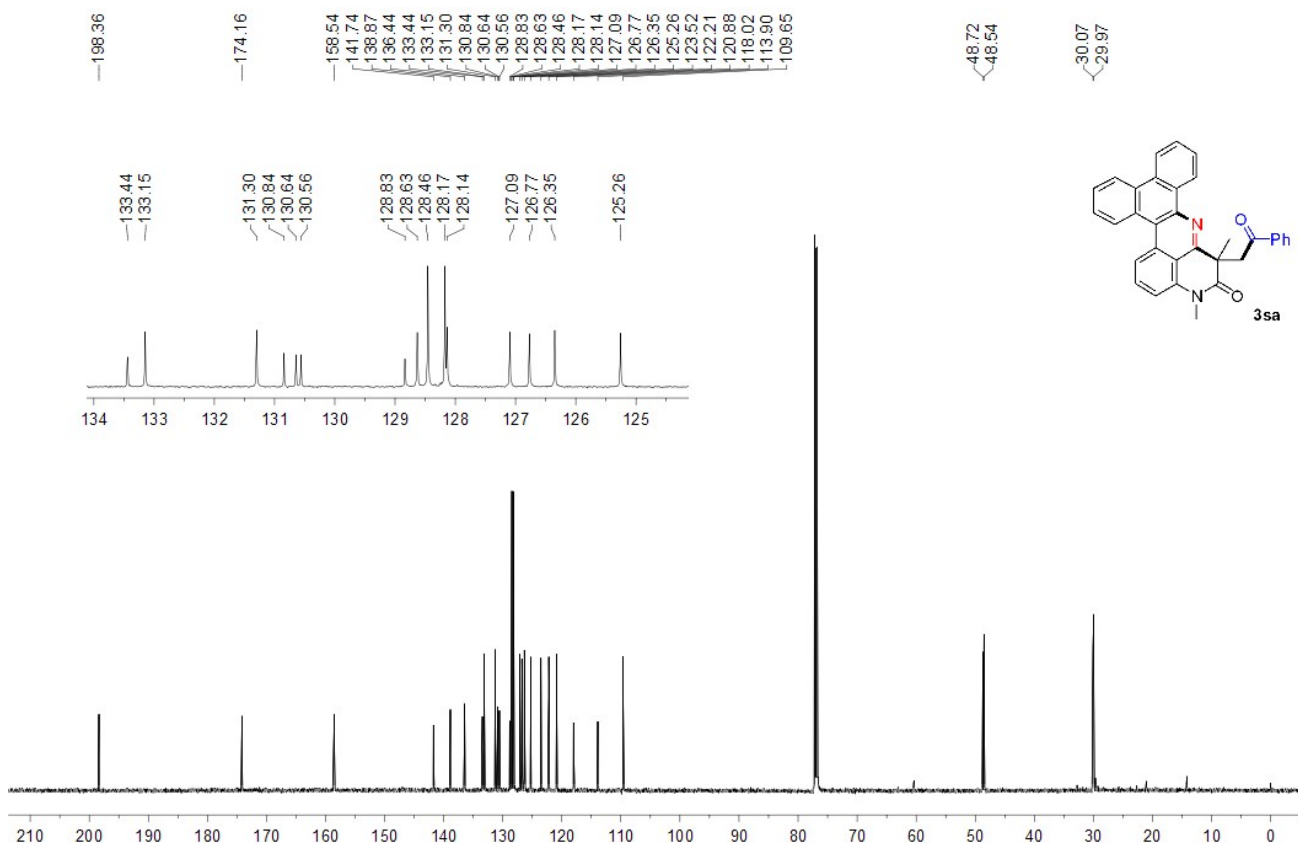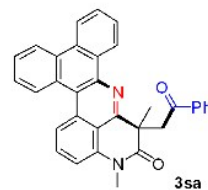

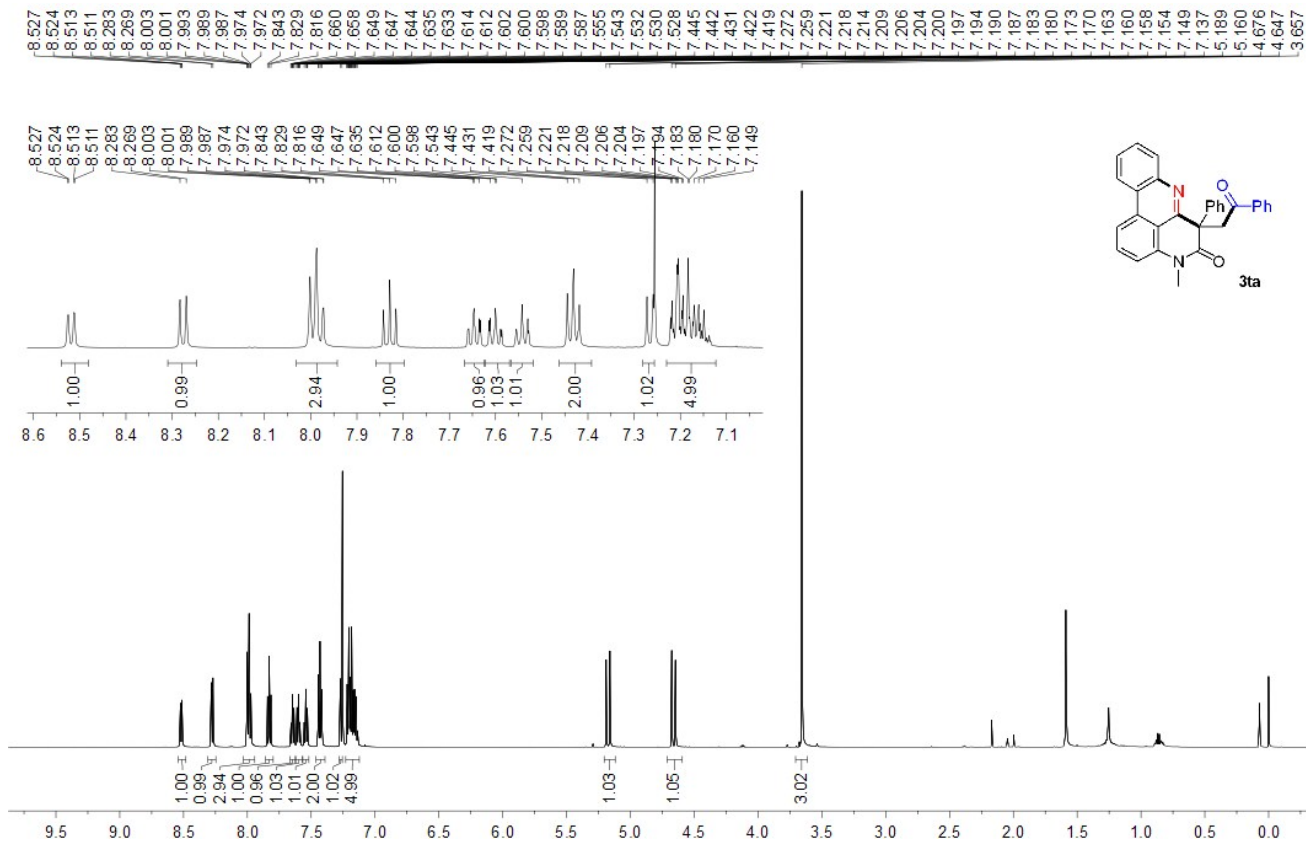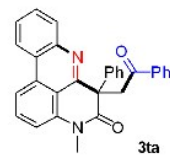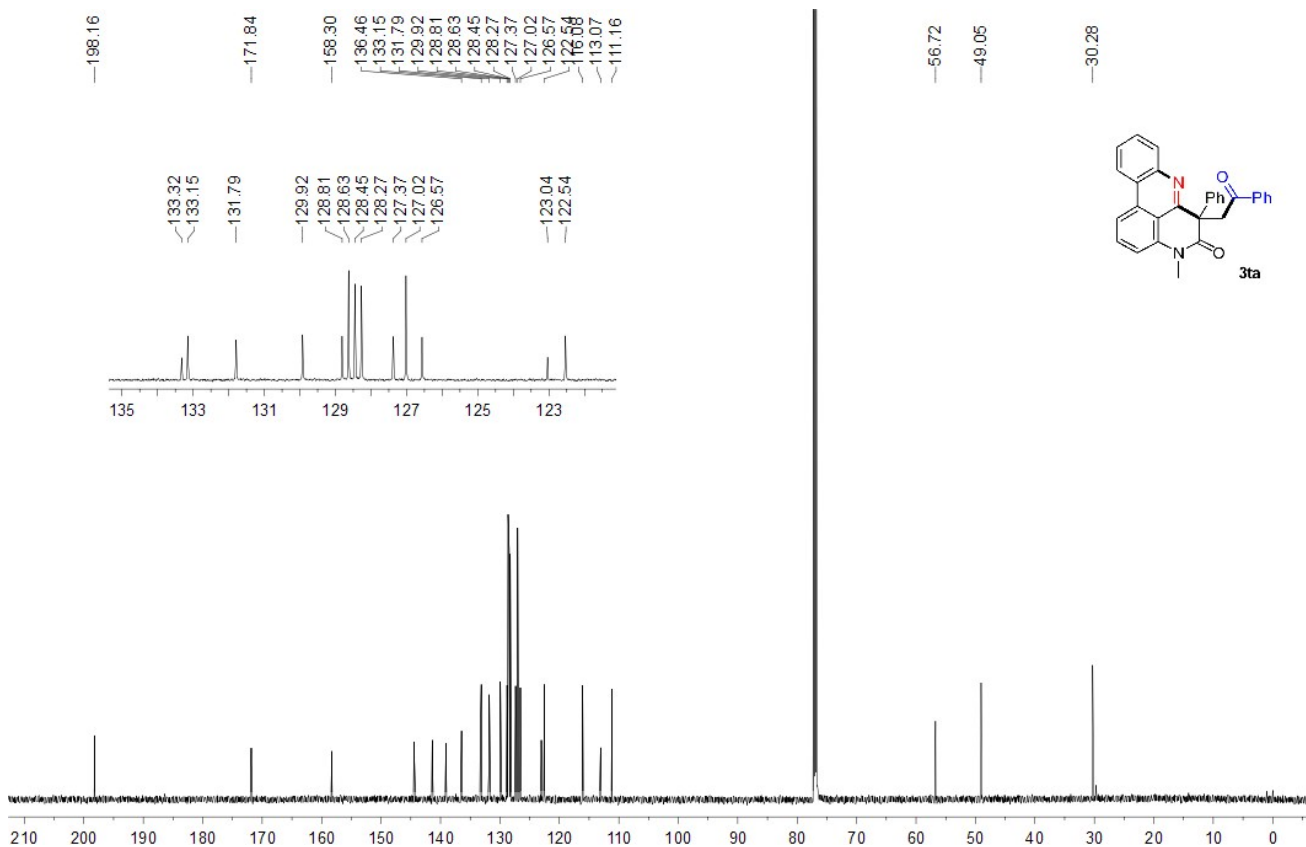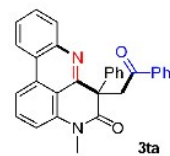



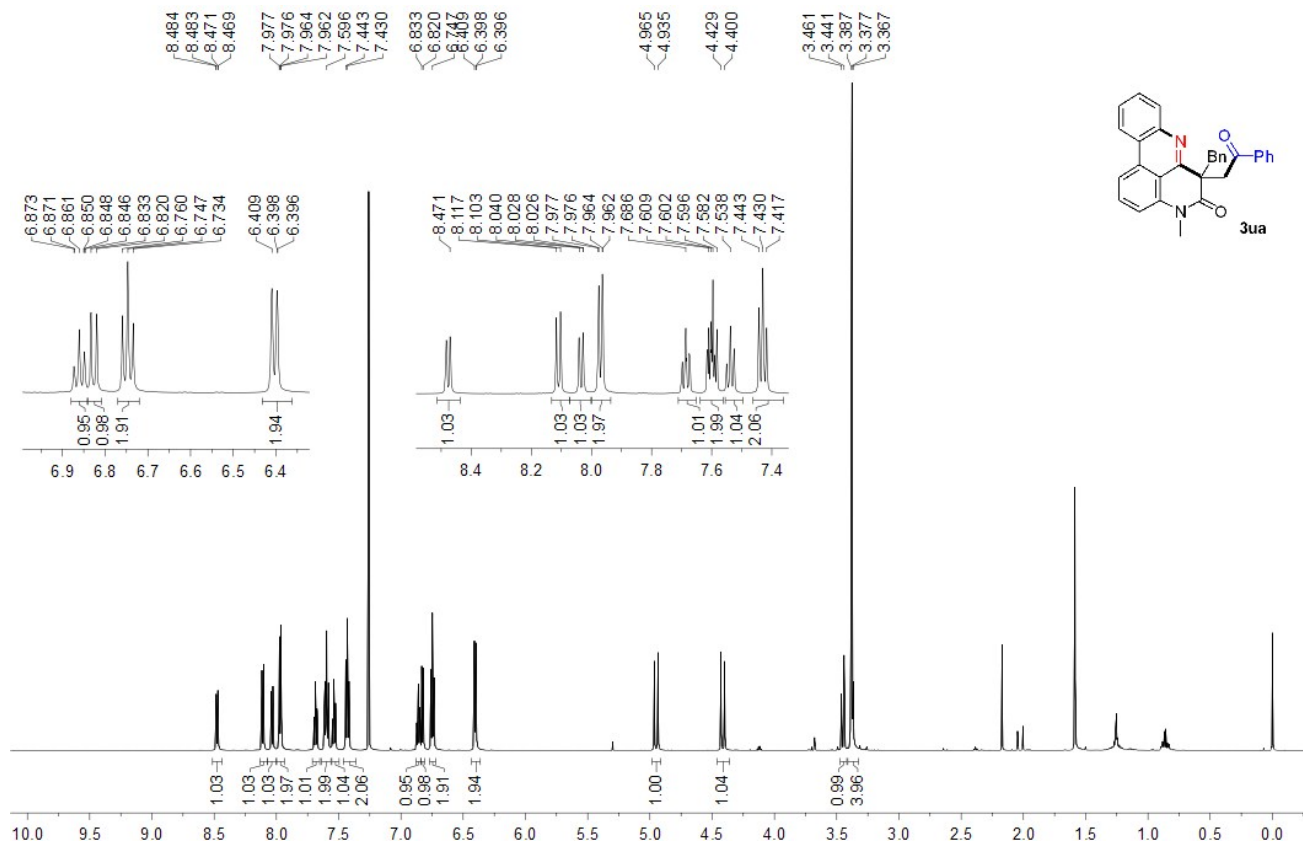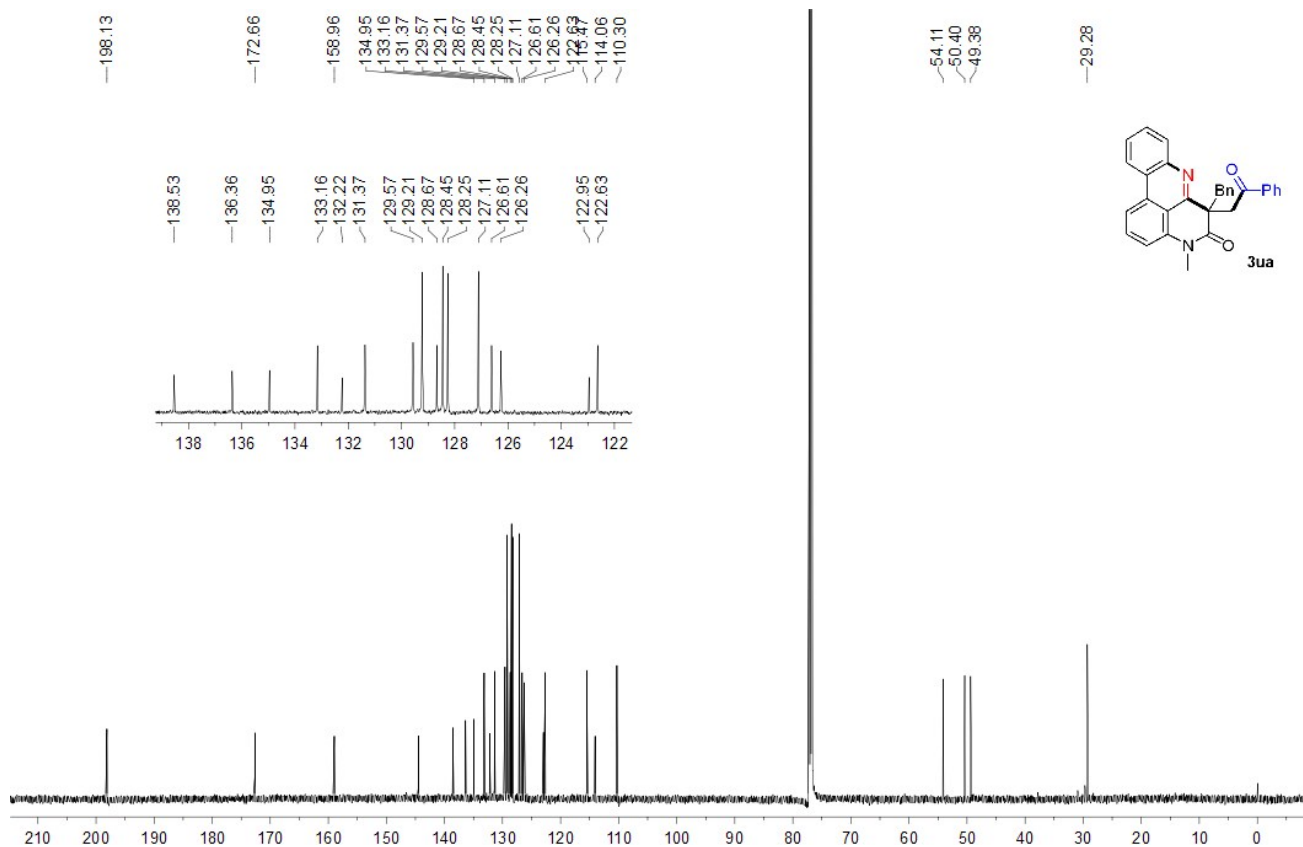

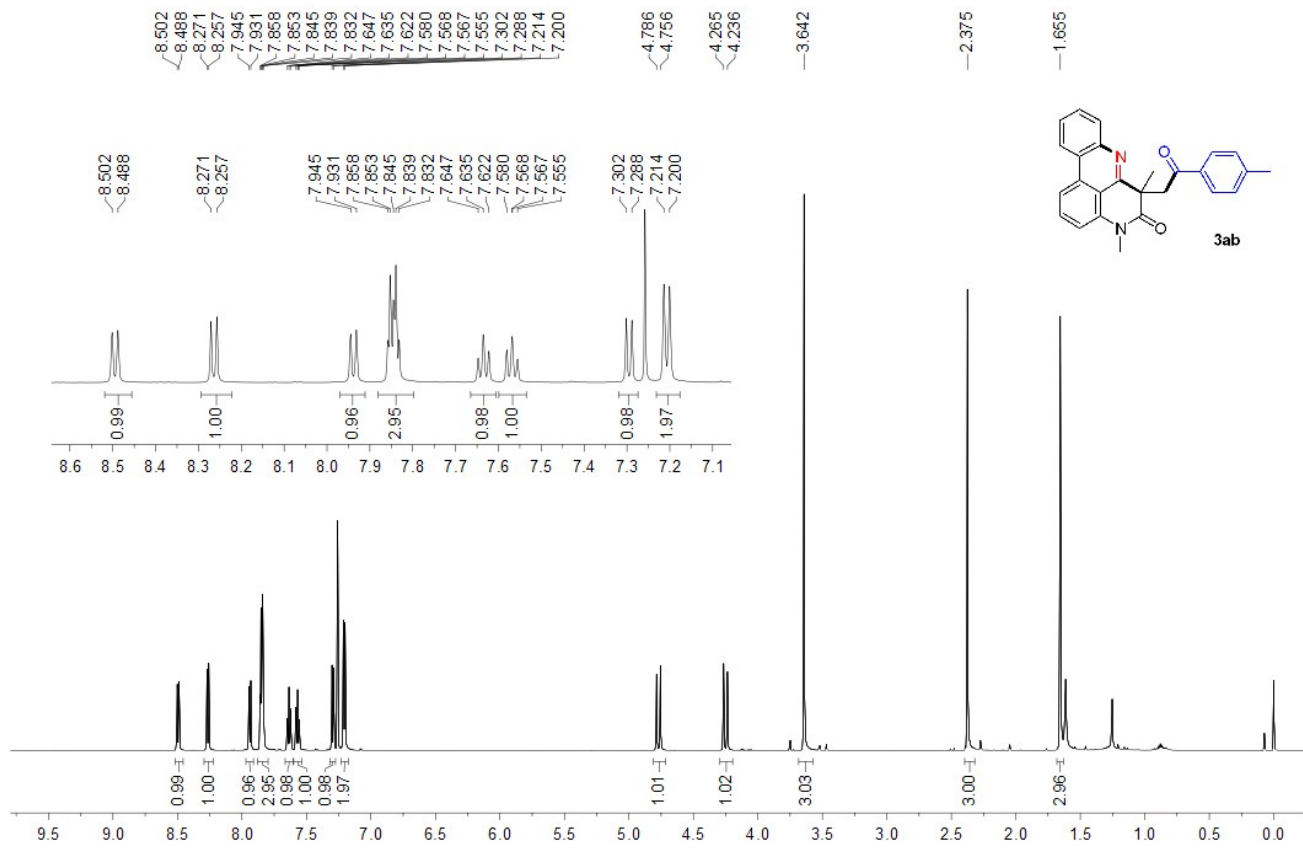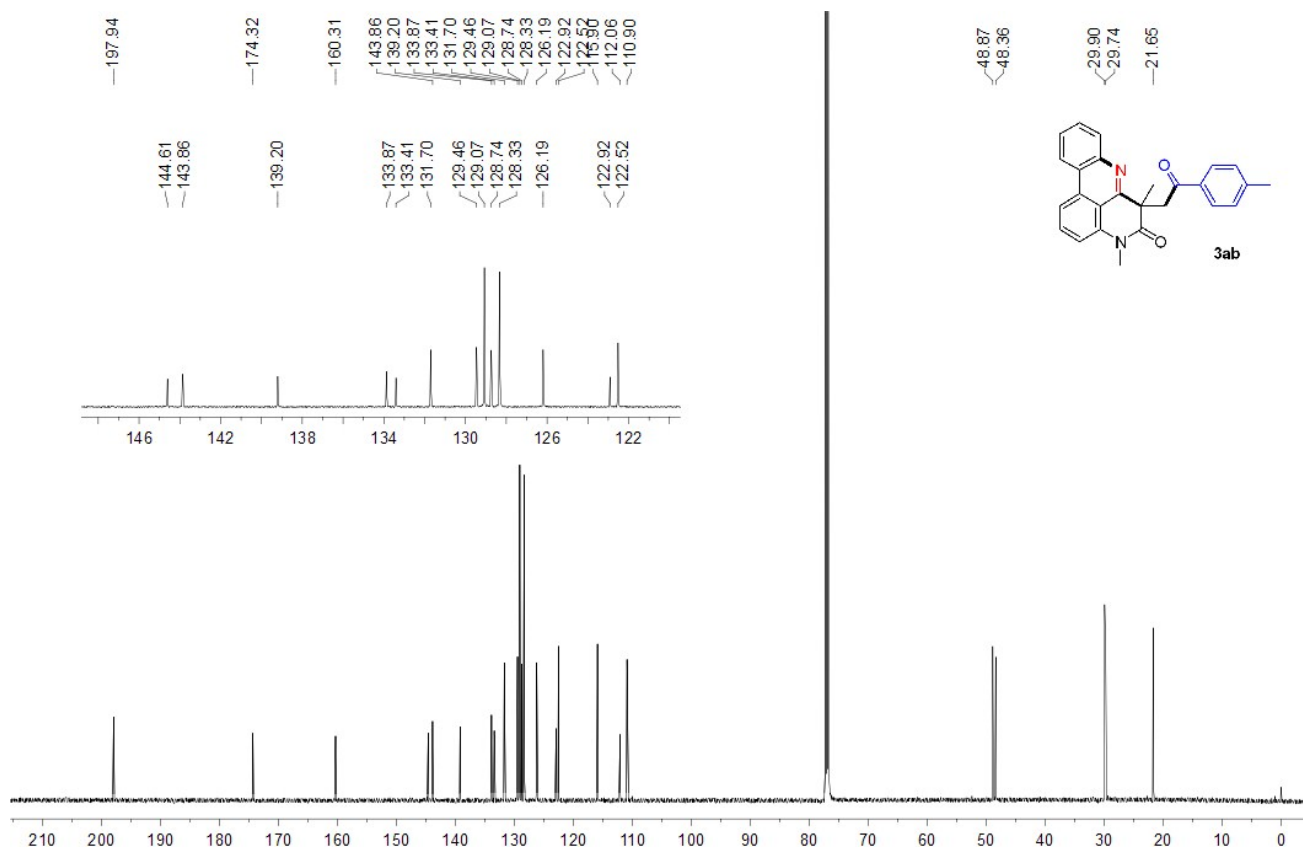



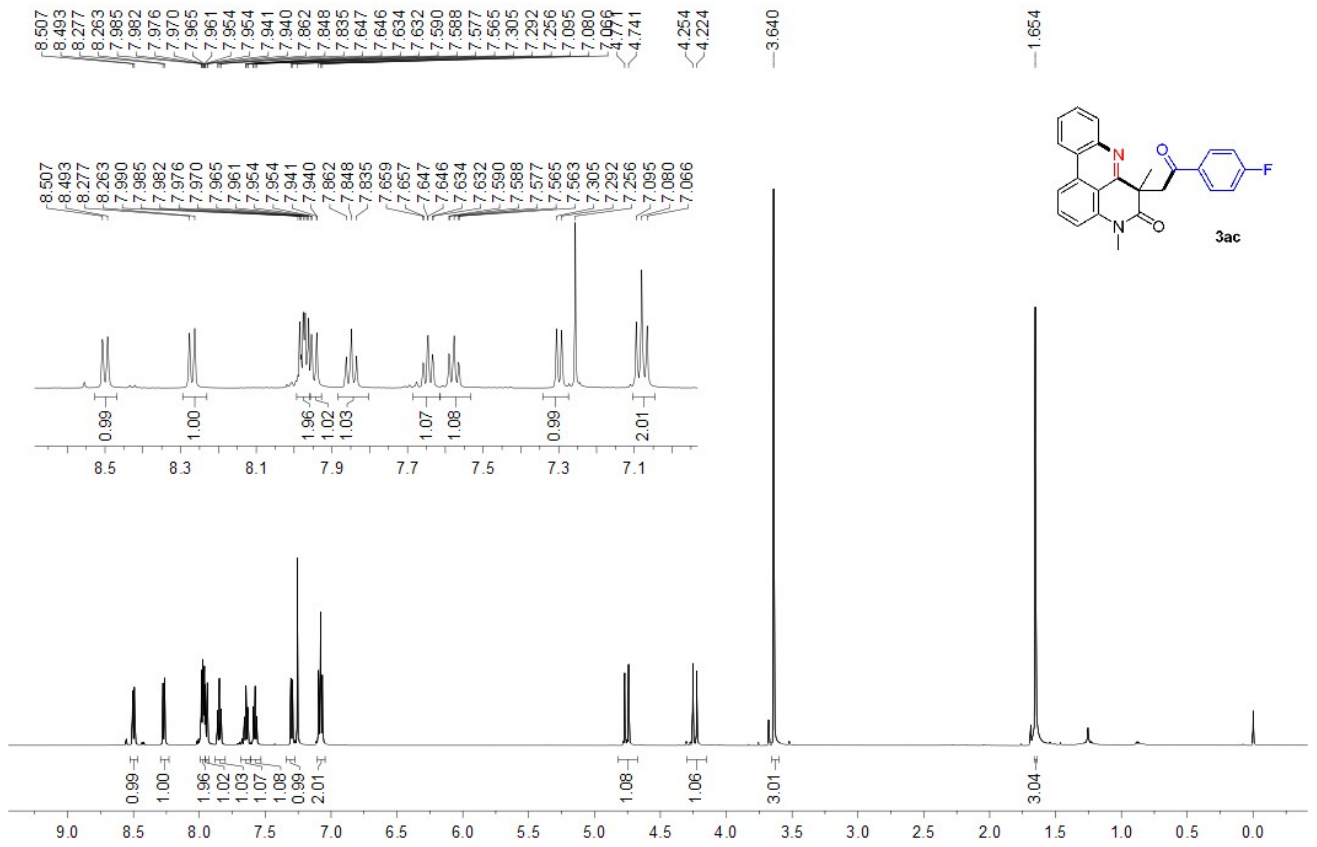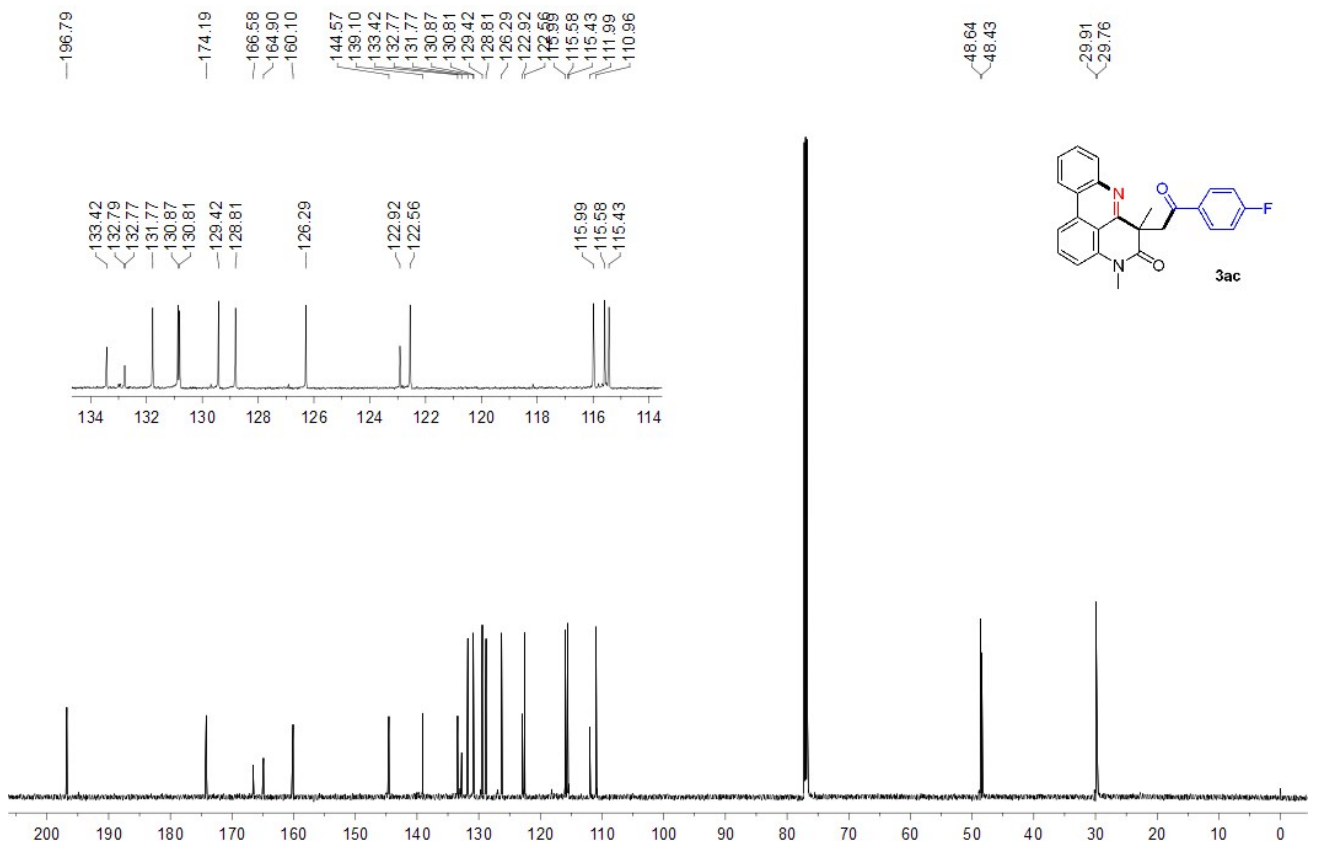

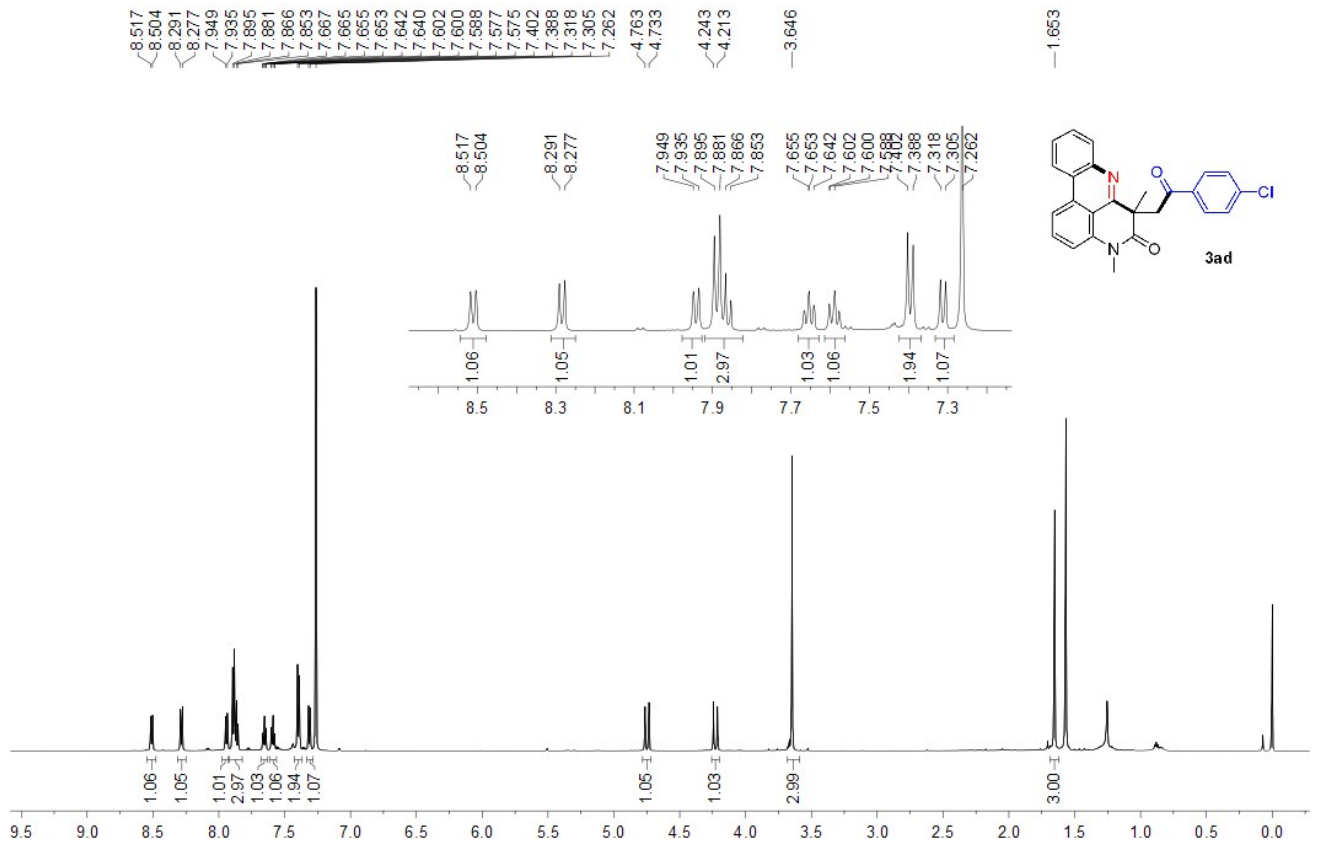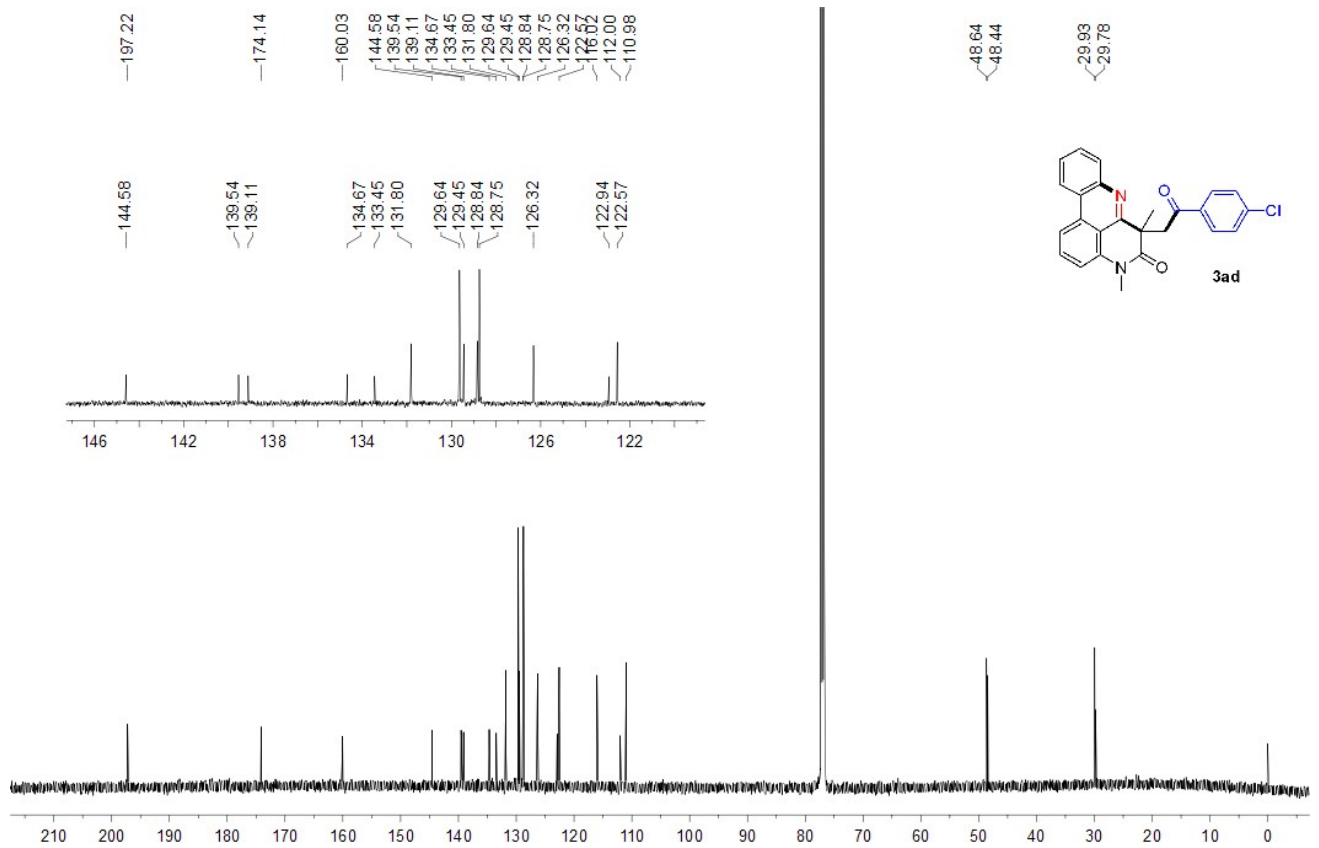

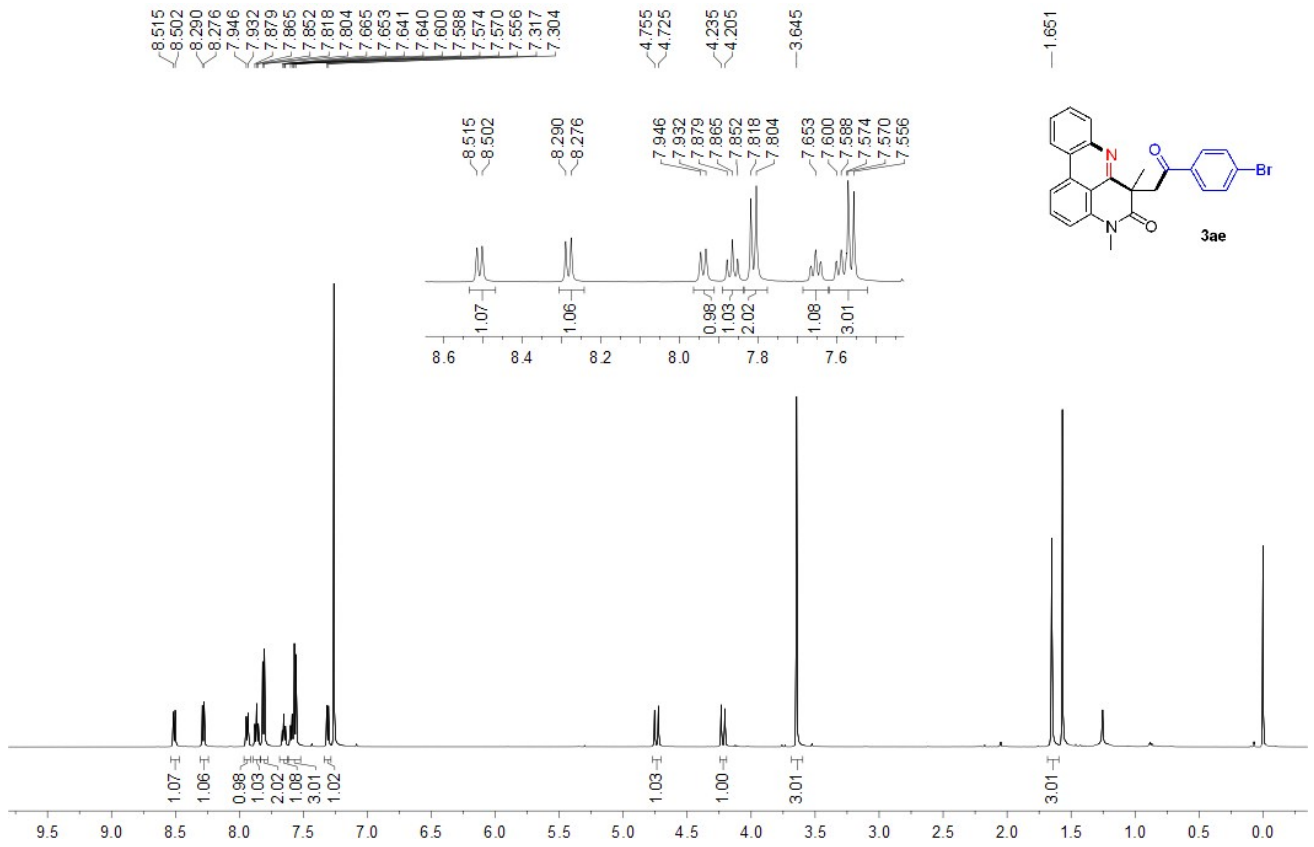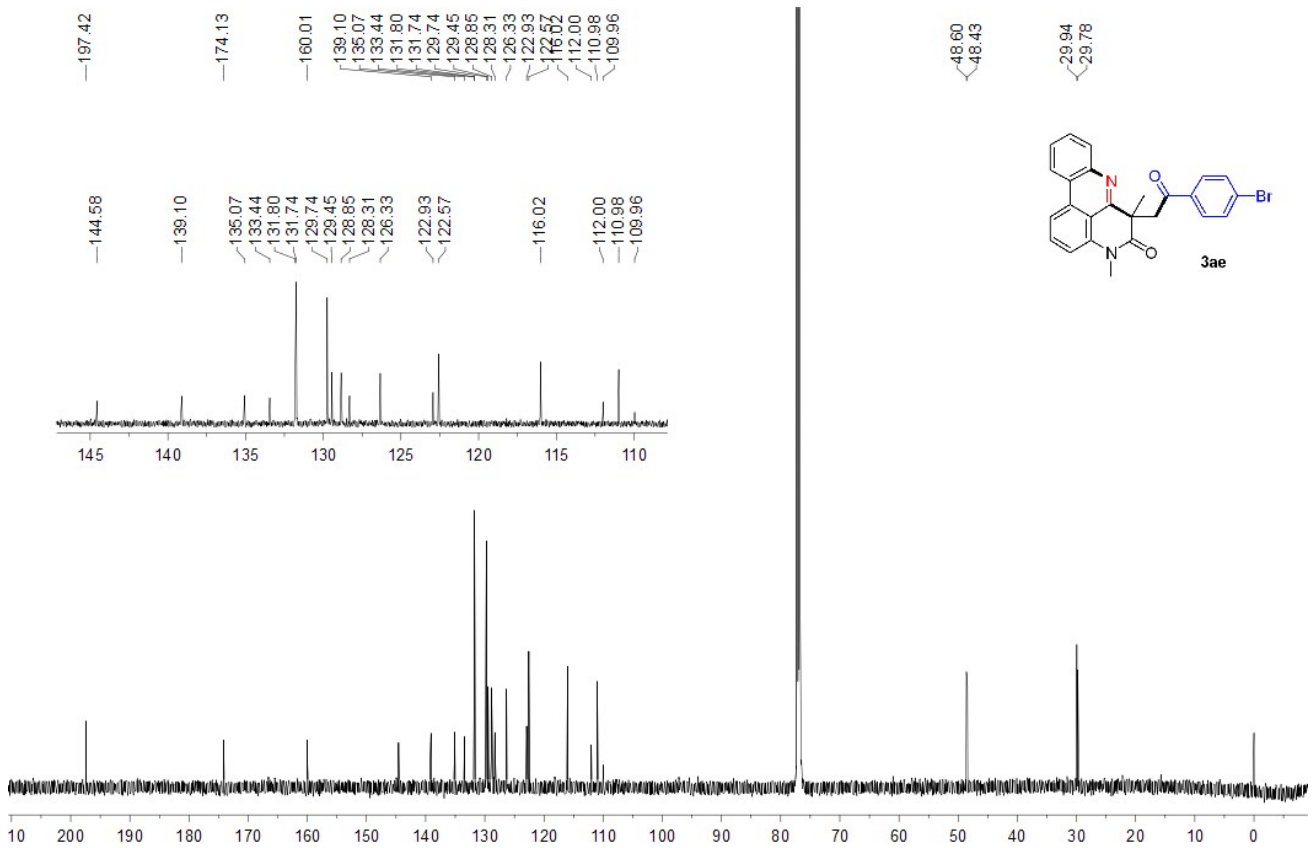

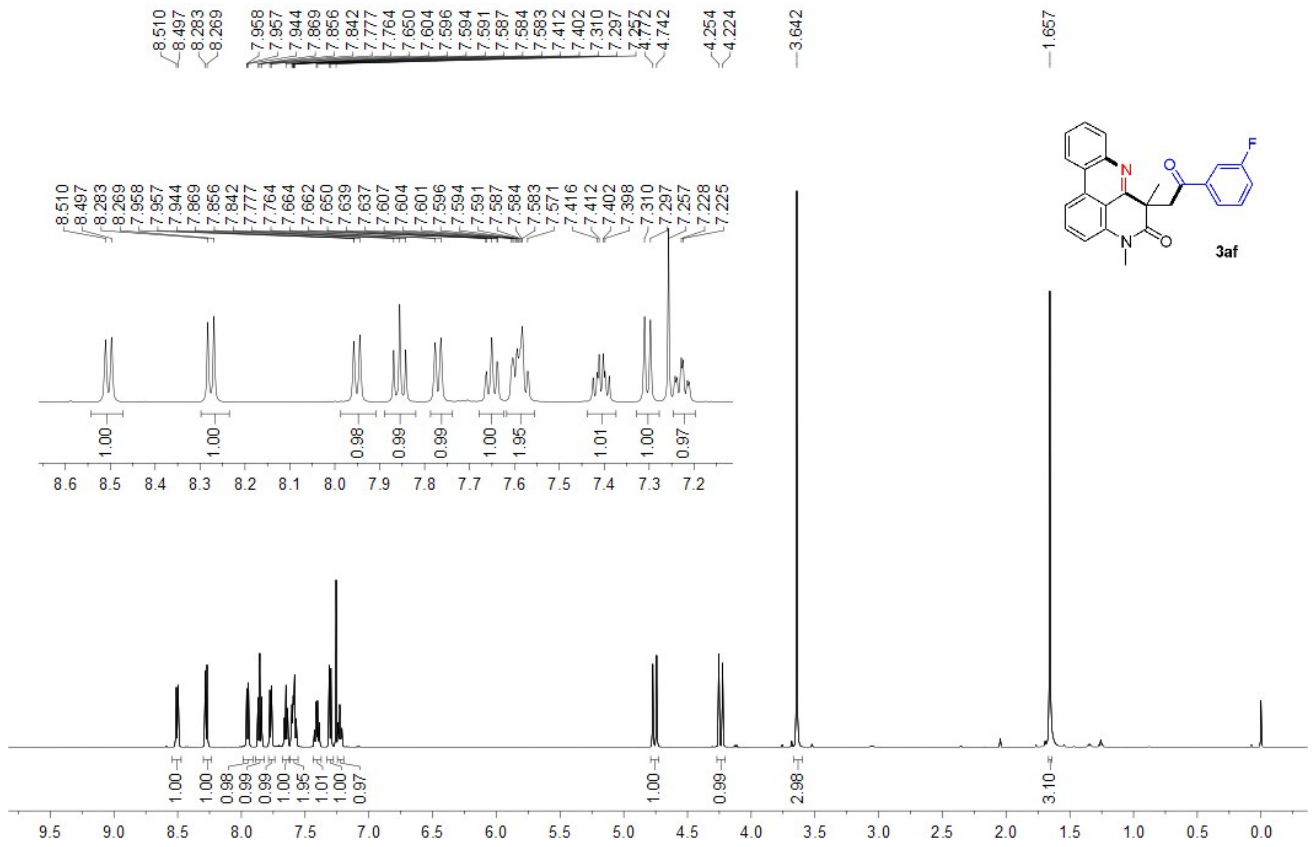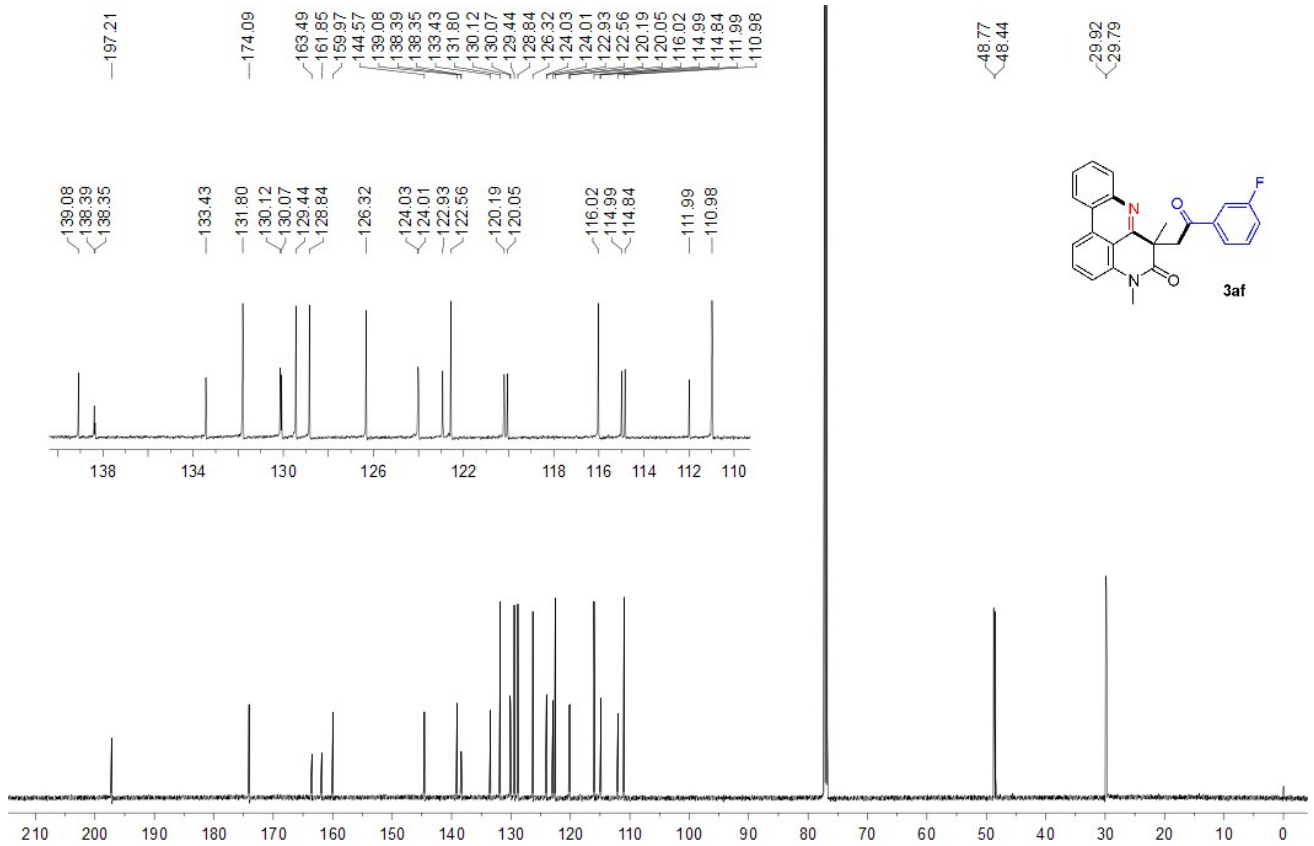

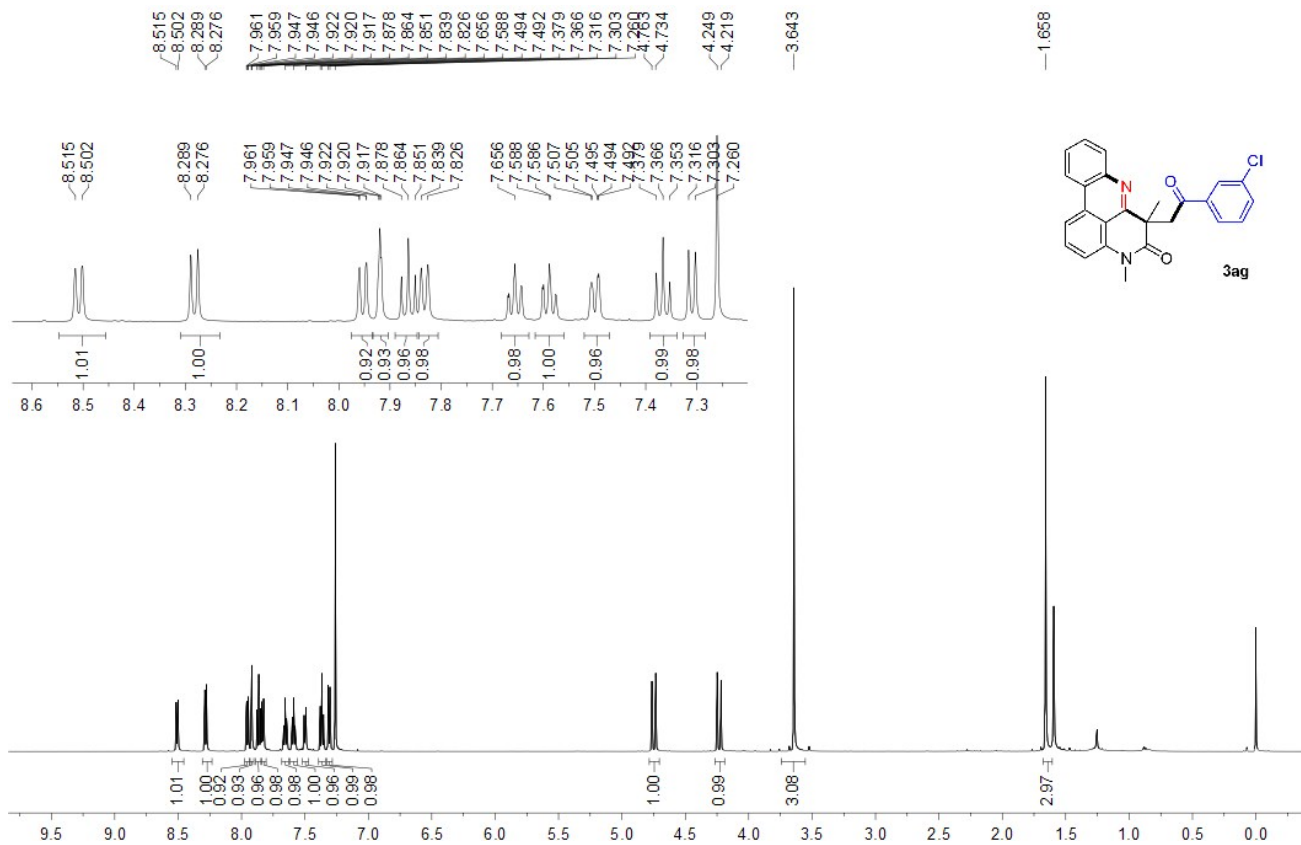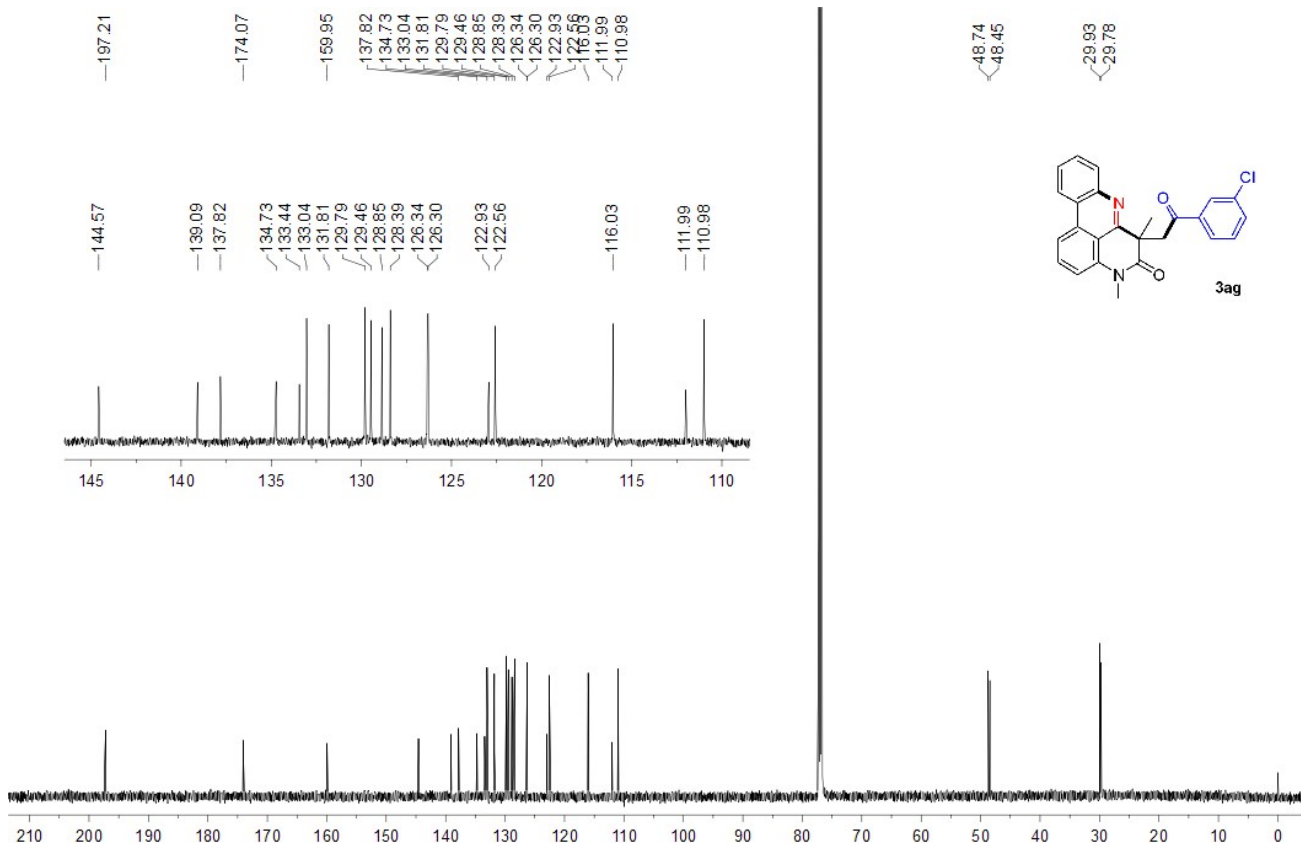

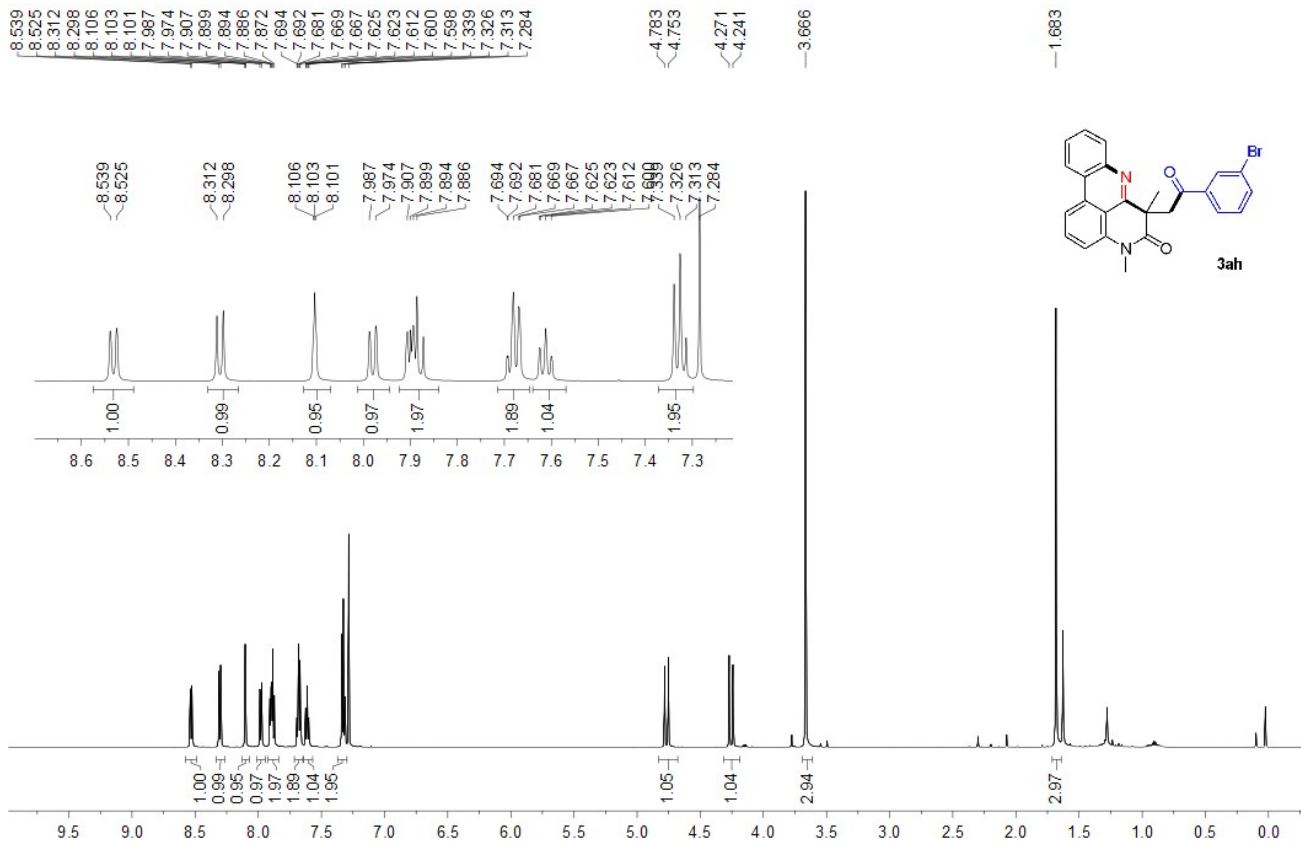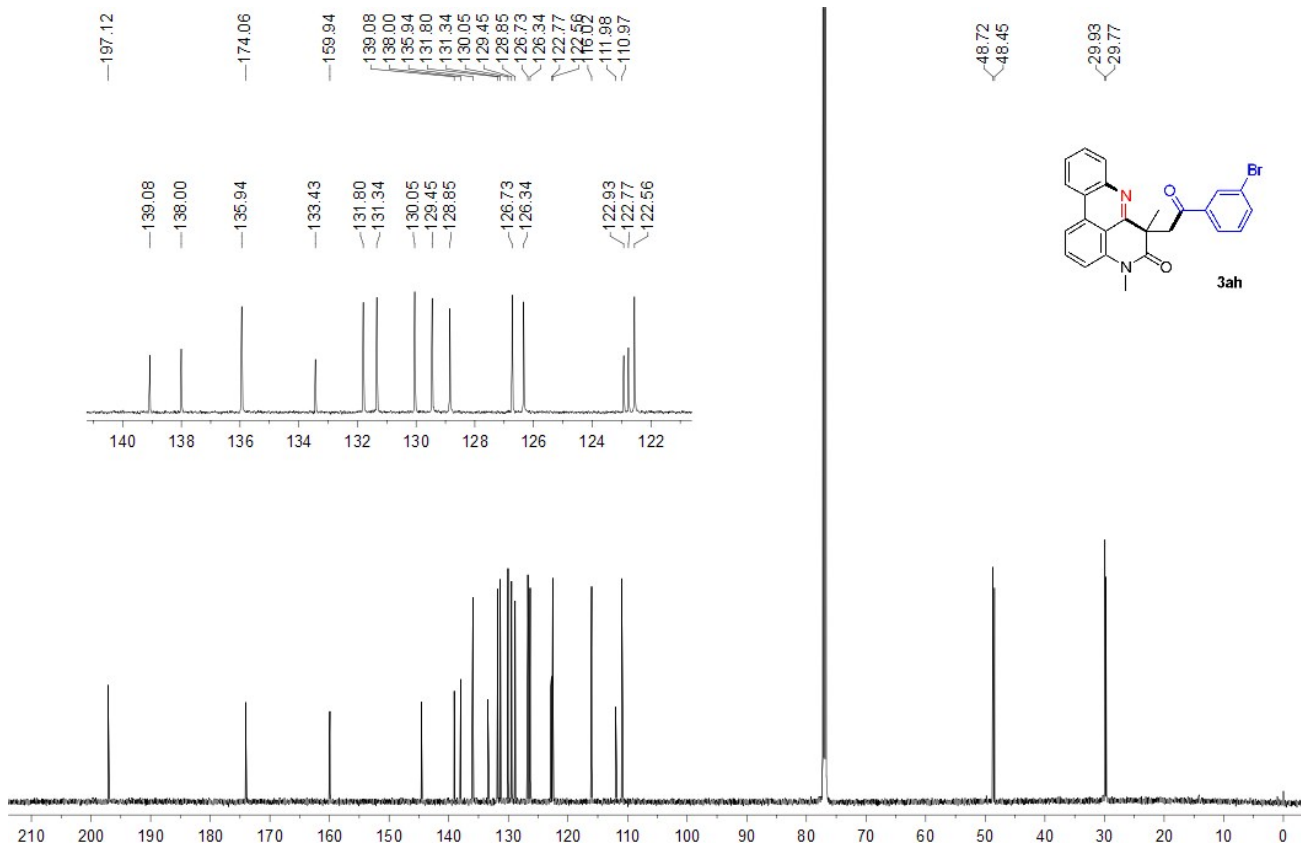



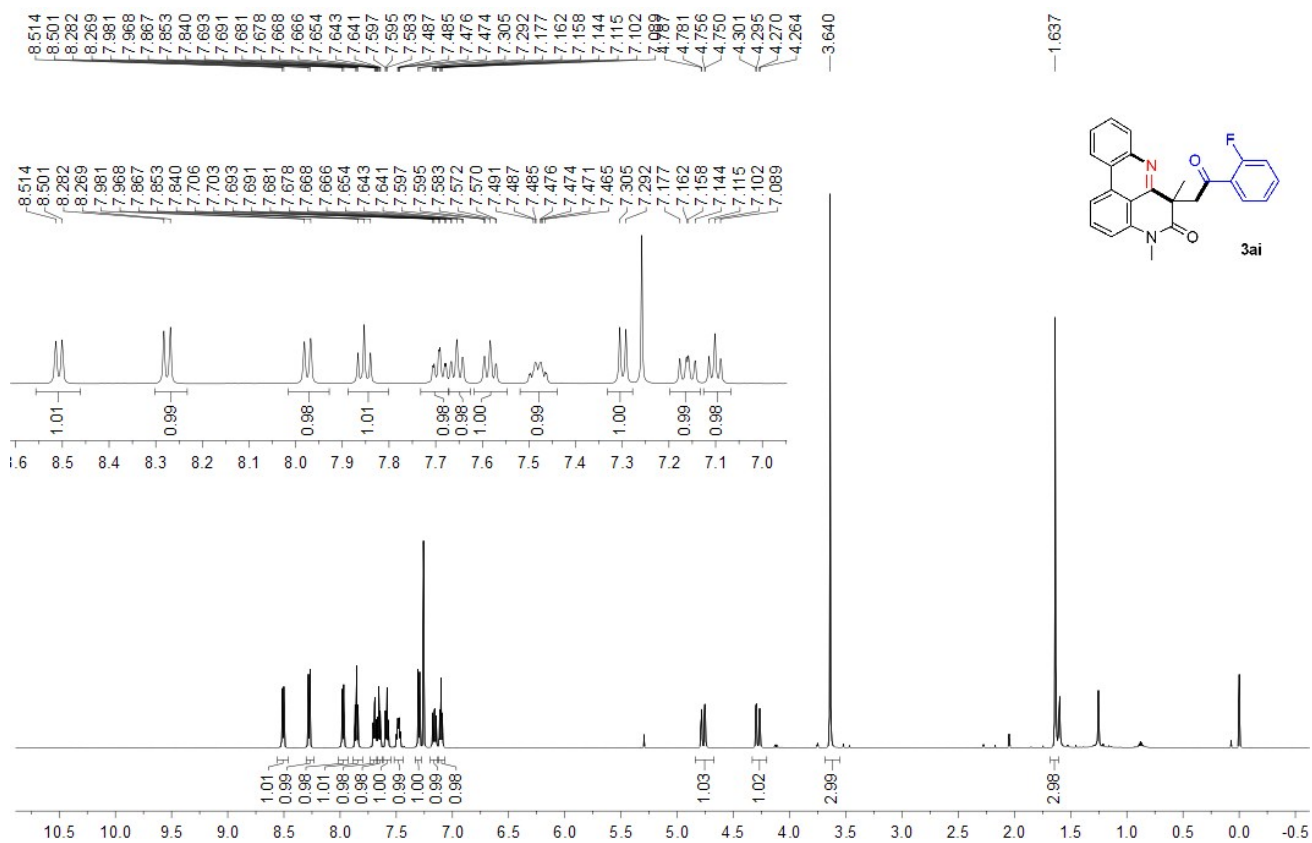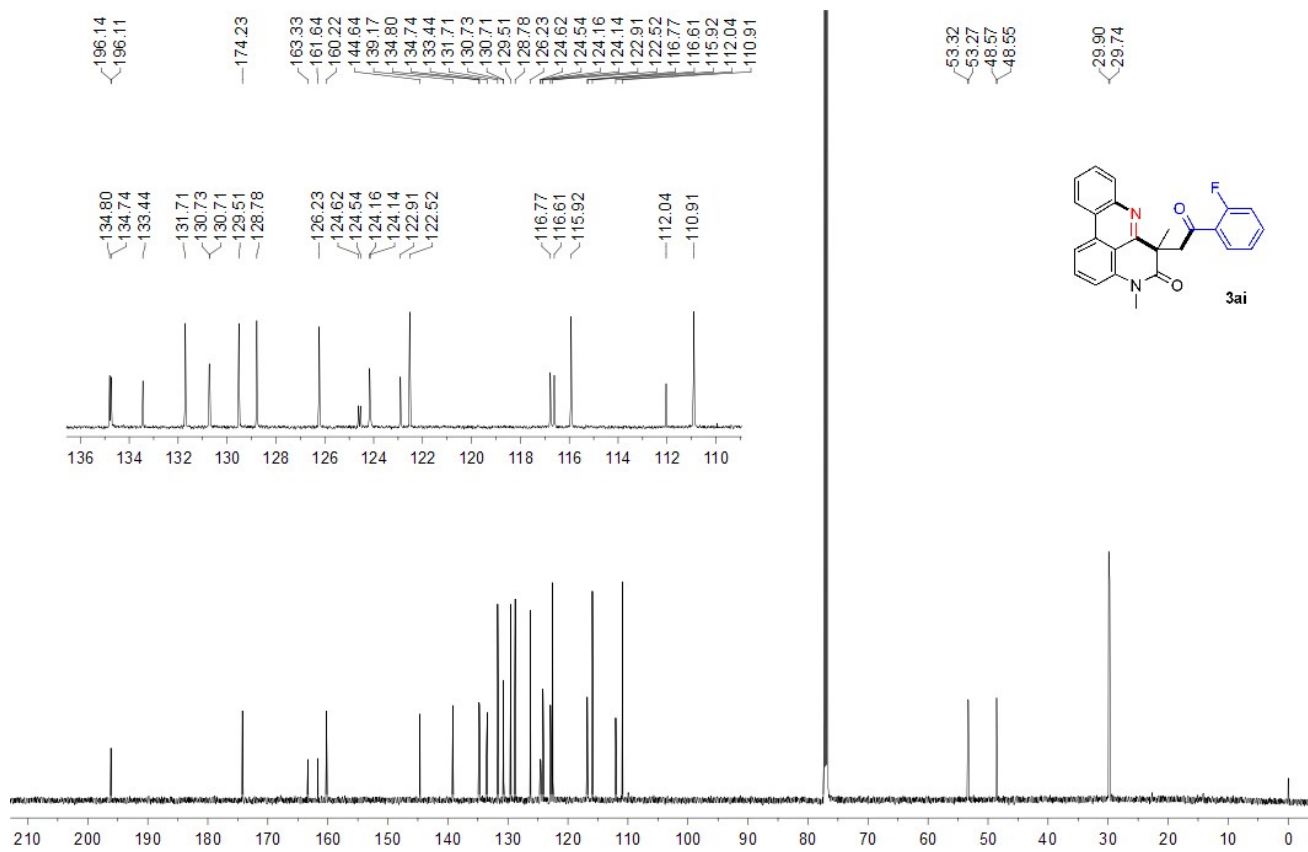

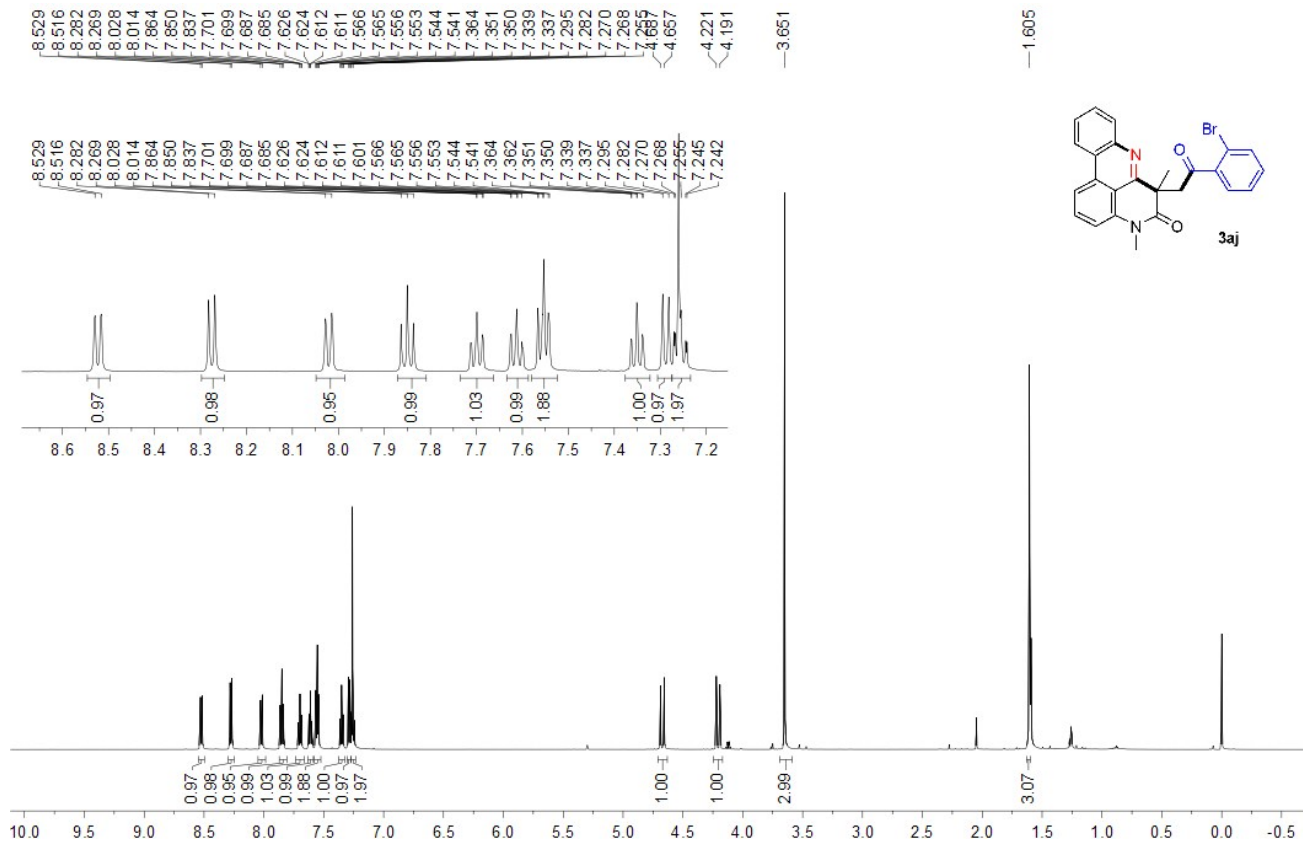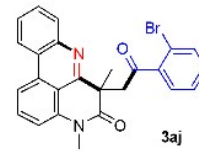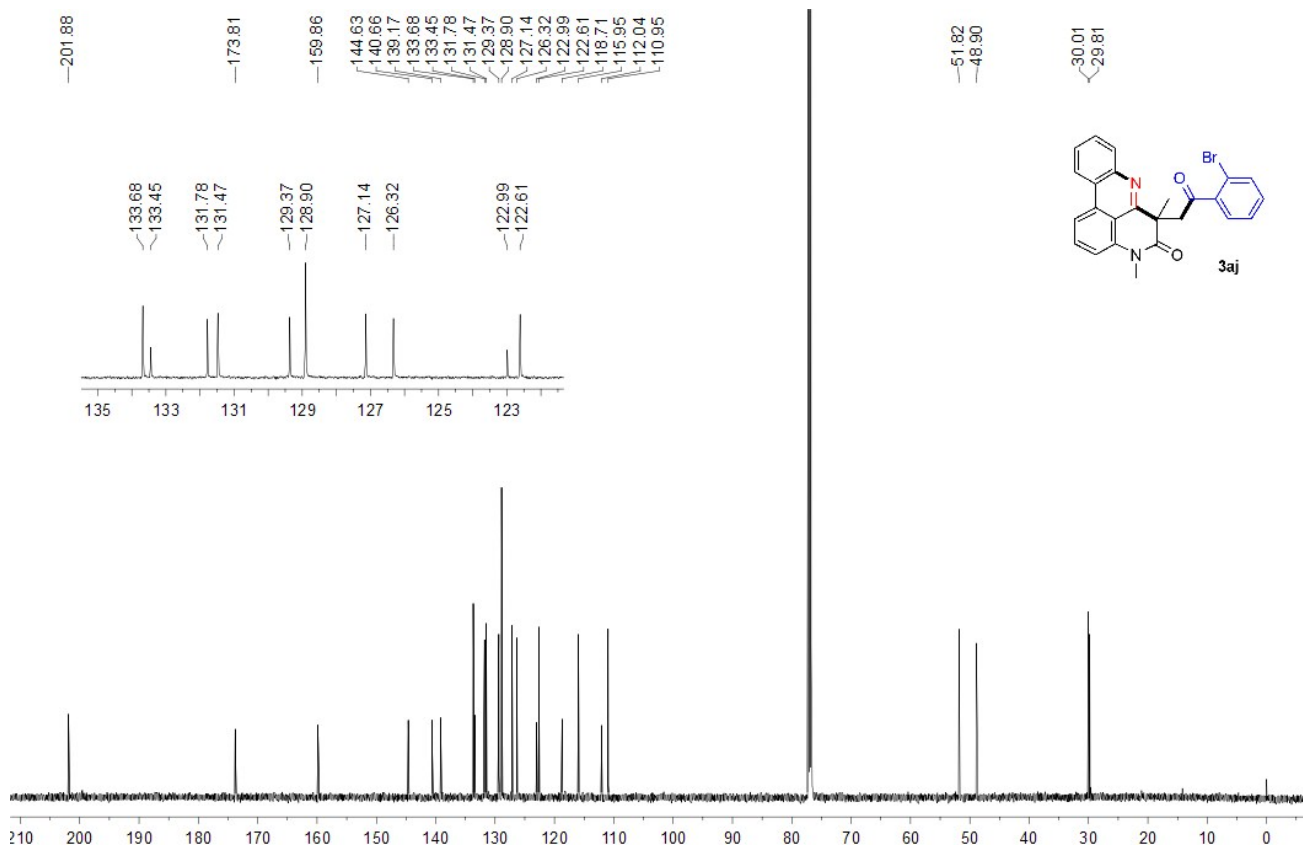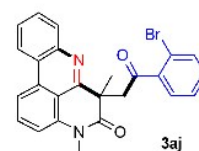



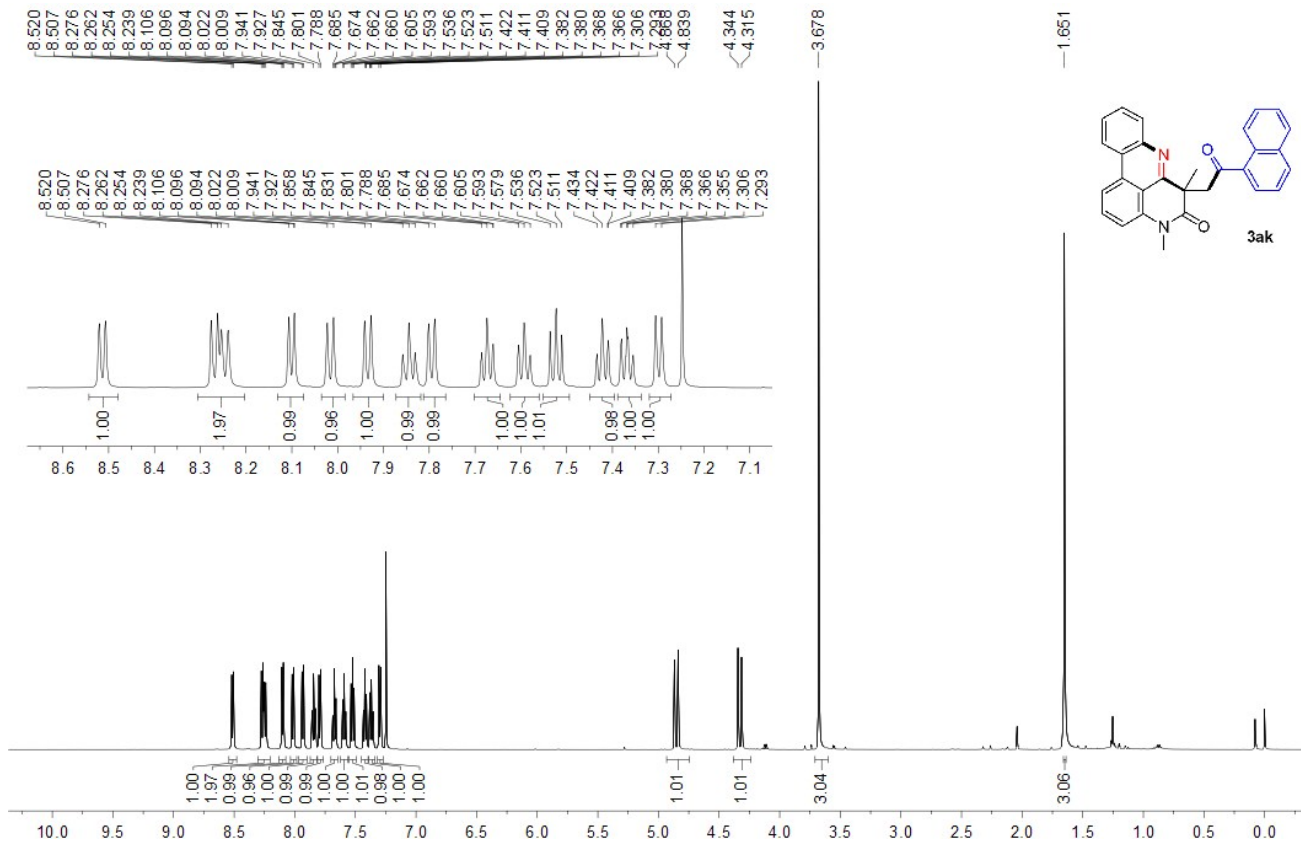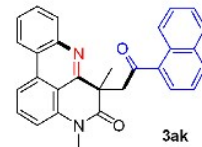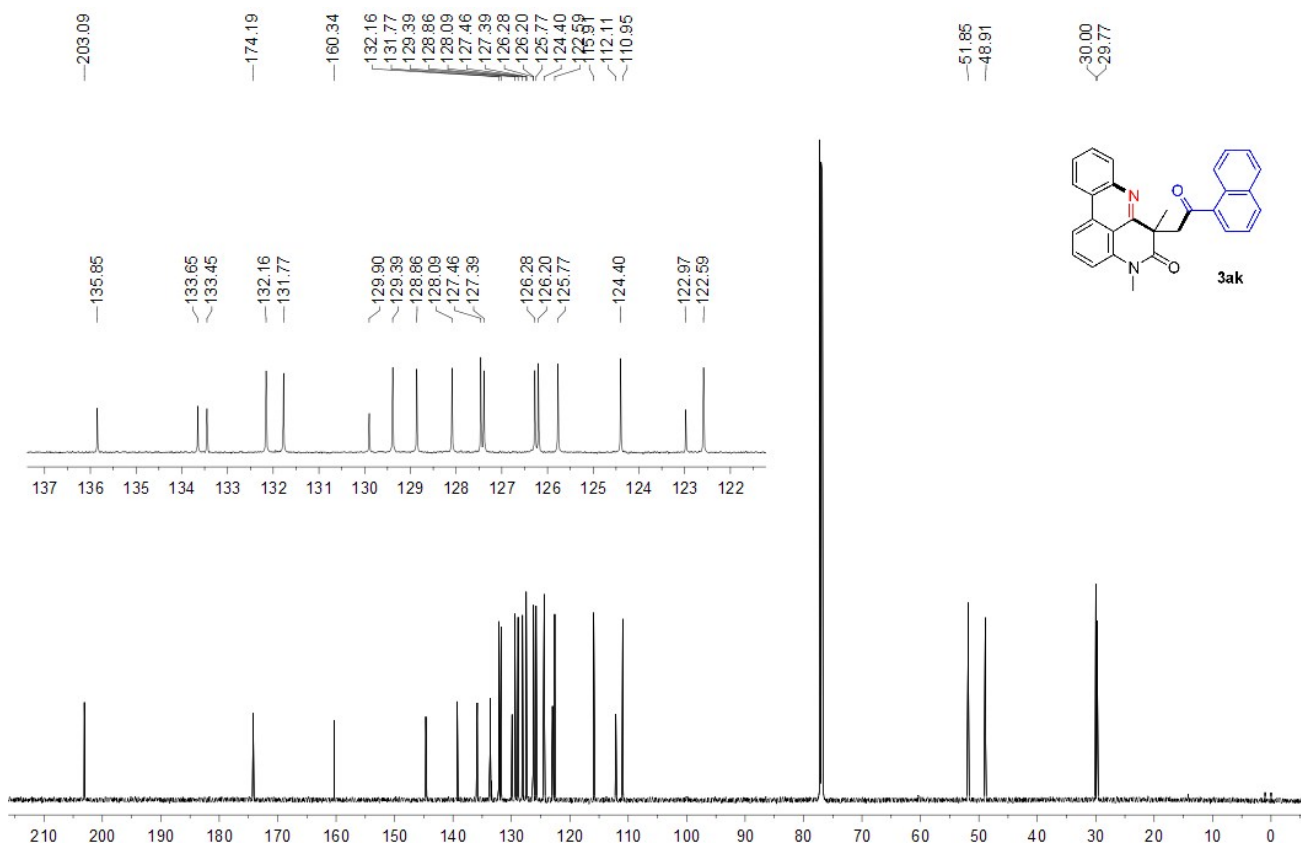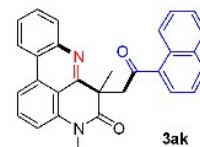

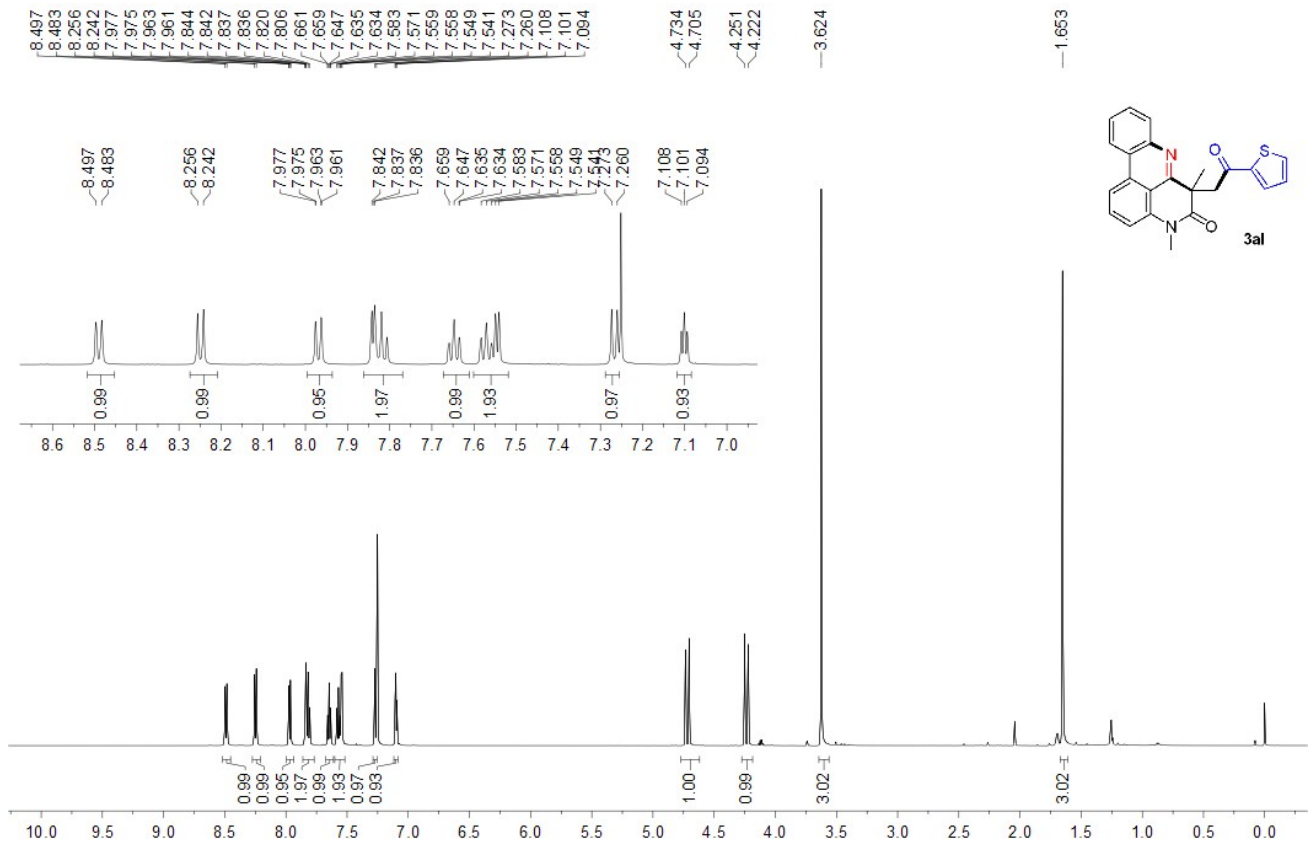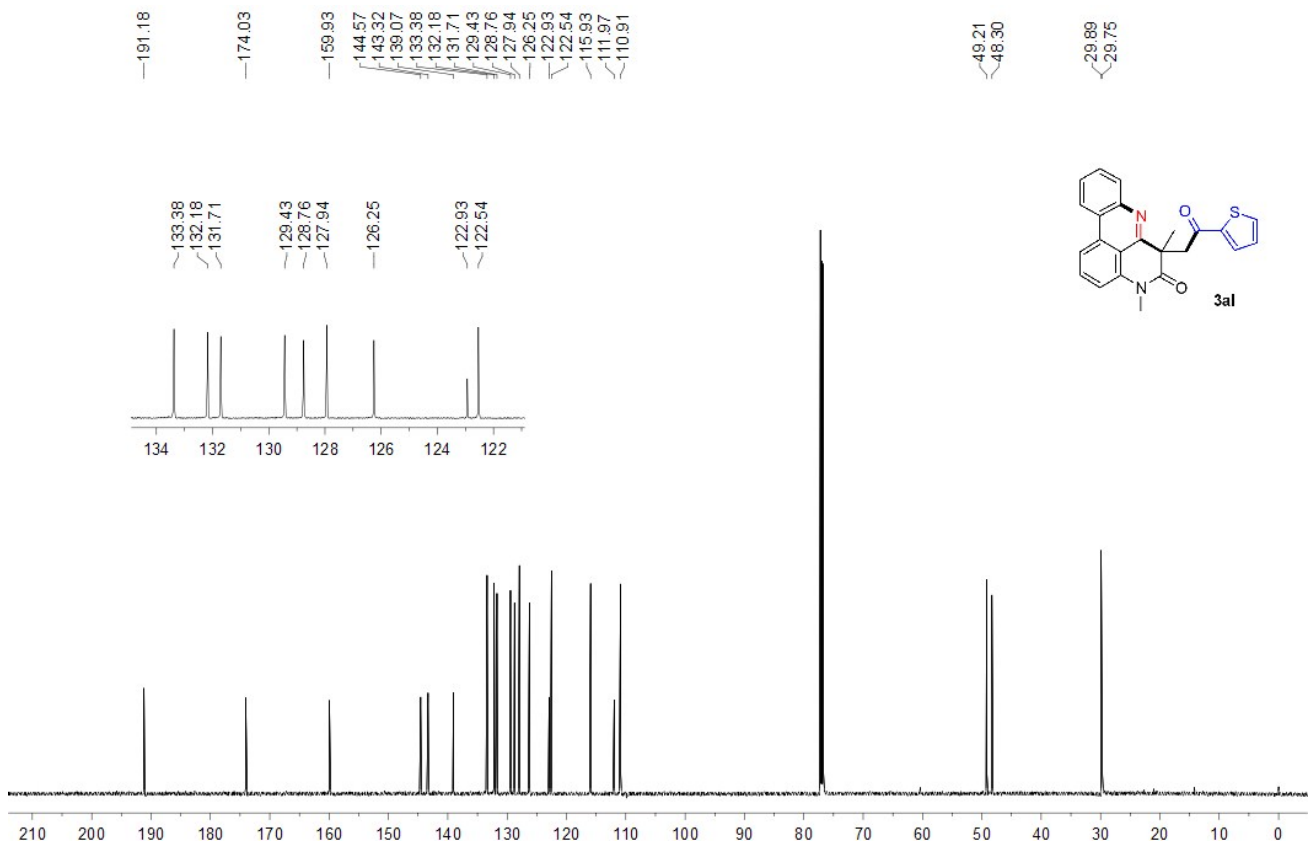

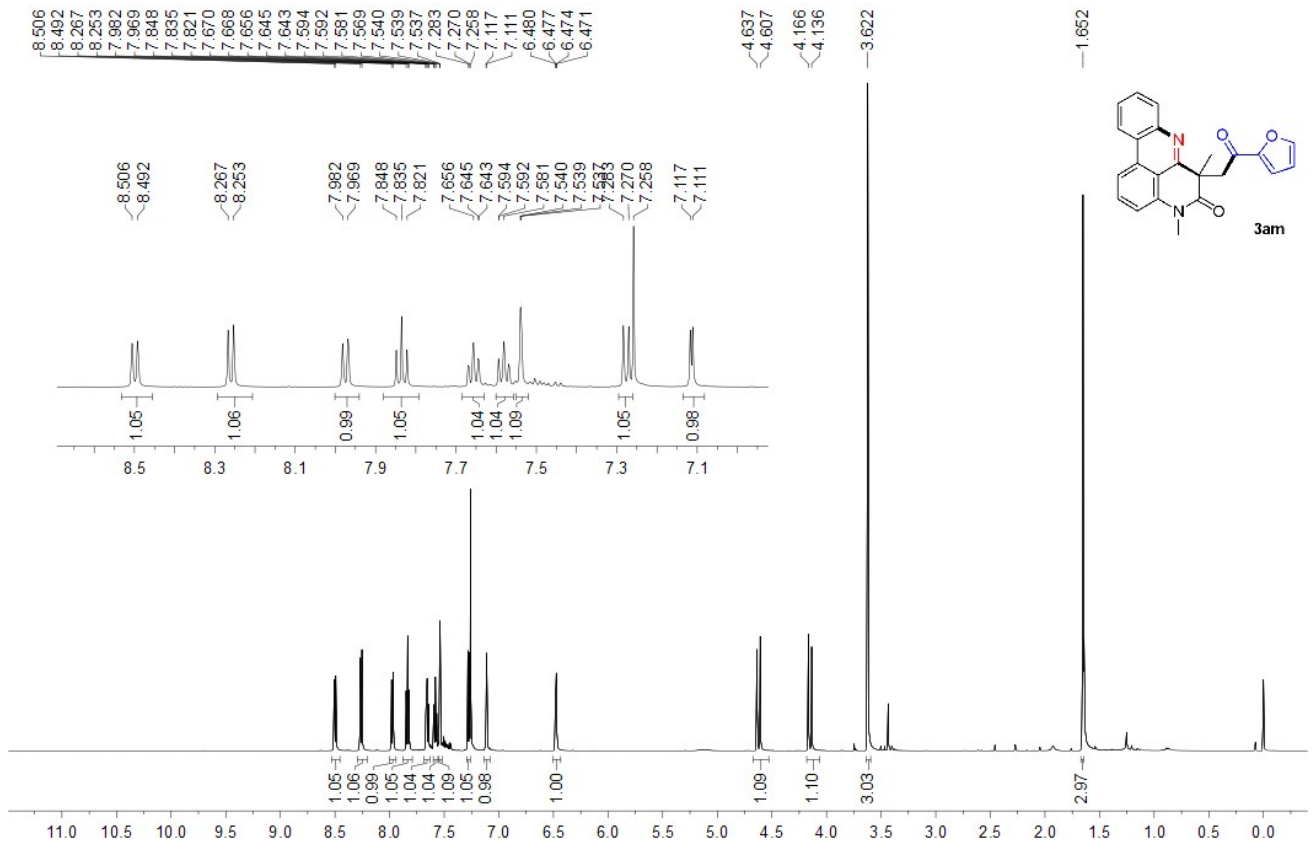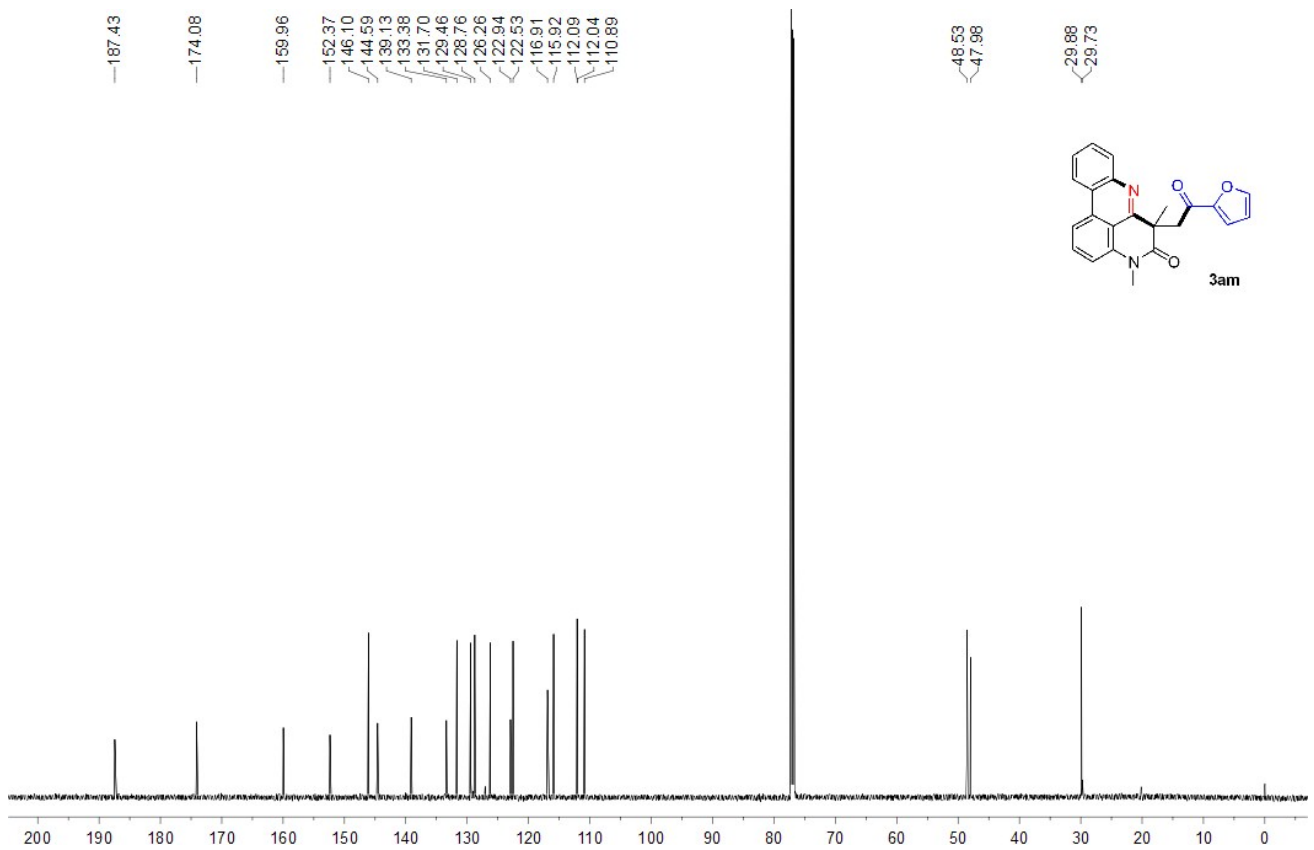

Supplement: c9ob02023c1.pdf [file c9ob02023c1.pdf]
